1 **Establishment of Proximity-dependent Biotinylation Approaches in Different Plant**  
2 **Model Systems**

3

4 **Deepanksha Arora<sup>1,2,\*</sup>, Nikolaj B. Abel<sup>3,\*</sup>, Chen Liu<sup>4,\*</sup>, Petra Van Damme<sup>1,2,5,\*</sup>, Lam Dai**  
5 **Vu<sup>1,2</sup>, Anna Tornkvist<sup>4</sup>, Francis Impens<sup>6,7,8</sup>, Dominique Eeckhout<sup>1,2</sup>, Alain Goossens<sup>1,2</sup>,**  
6 **Geert De Jaeger<sup>1,2,#</sup>, Thomas Ott<sup>3,9,#</sup>, Panagiotis Moschou<sup>4,10,11,#</sup>, Daniel Van Damme<sup>1,2,#</sup>**

7 <sup>1</sup> Ghent University, Department of Plant Biotechnology and Bioinformatics, Technologiepark  
8 71, 9052 Ghent University, Ghent, Belgium.

9 <sup>2</sup> VIB Center for Plant Systems Biology, Technologiepark 71, 9052 Ghent, Belgium.

10 <sup>3</sup> Faculty of Biology, Cell Biology, University of Freiburg, Germany.

11 <sup>4</sup> Department of Plant Biology, Uppsala BioCenter, Swedish University of Agricultural  
12 Sciences and Linnean Center for Plant Biology, Uppsala, Sweden.

13 <sup>5</sup> Department of Biochemistry and Microbiology, Ghent University, Ghent, Belgium

14 <sup>6</sup> Department of Biochemistry, Ghent University, Ghent, Belgium.

15 <sup>7</sup> VIB Center for Medical Biotechnology, Ghent, Belgium.

16 <sup>8</sup> VIB Proteomics Core, Ghent, Belgium.

17 <sup>9</sup> CIBSS – Centre for Integrative Biological Signalling Studies, University of Freiburg,  
18 Germany

19 <sup>10</sup> Department of Biology, University of Crete, Heraklion, Greece.

20 <sup>11</sup> Institute of Molecular Biology and Biotechnology, Foundation for Research and  
21 Technology - Hellas, Heraklion, Greece.

22

23 \* joint first authors

24 # joint senior and corresponding authors

25

26 **Running title:** Proximity-dependent biotinylation in plants

27 **Abstract**

28 The use of proximity-dependent biotin labelling (PDL) approaches coupled with mass  
29 spectrometry recently greatly advanced the identification of protein-protein interactions and  
30 study of protein complexation. PDL is based on the expression of a promiscuous biotin ligase  
31 (PBL), e.g. BirA\* or a peroxidase fused to a bait protein of interest. In the presence of biotin  
32 as substrate, PBL enables covalent biotin labelling of proteins in the vicinity of the PBL-fused  
33 bait *in vivo*, allowing the subsequent capture and identification of interacting and neighbouring  
34 proteins without the need for the protein complex to remain intact during purification. To date,  
35 PDL has not been extensively used in plants. Here we present the results of a systematic multi-  
36 lab study applying a variety of PDL approaches in several plant systems under various  
37 conditions and bait proteins. We show that TurboID is the most promiscuous variant for PDL  
38 in plants and establish protocols for its efficient application. We demonstrate the applicability  
39 of TurboID in capturing membrane protein interactomes using the *Lotus japonicus*  
40 symbiotically active receptor kinases RLKs NOD FACTOR RECEPTOR 5 (NFR5) and LRR-  
41 RLK SYMBIOTIC RECEPTOR-KINASE (SYMRK) as test-cases. Furthermore, we  
42 benchmark the efficiency of various PBLs using the octameric endocytic TPLATE complex  
43 and compare PDL with one-step AP-MS approaches. Our results indicate that different PDL  
44 approaches in plants may differ in signal-to-noise ratio and robustness. We present a  
45 straightforward strategy to identify both non-biotinylated as well as biotinylated proteins in  
46 plants in a single experimental setup. Finally, we provide initial evidence that this technique  
47 has potential to infer structural information of protein complexes. Our methods, tools and  
48 adjustable pipelines provide a useful resource for the plant research community.

49

## 50 INTRODUCTION

51 Protein-protein interaction (PPI) studies often fail to capture low affinity interactions as these  
52 are usually not maintained following cell lysis and protein extraction. This is in particular the  
53 case for PPI's with or among integral membrane proteins because of the harsh conditions  
54 during protein extraction and purification. Proximity-dependent biotin labelling (PDL) on the  
55 contrary, uses covalent biotinylation of proteins that are interactors or near-neighbours of a  
56 certain bait protein *in vivo* [1]. Hence, in order to identify interactions, they do not need to  
57 remain intact during purification. Biotin is an essential cofactor for a small number of  
58 omnipresent biotin-dependent enzymes involved mainly in the transfer of CO<sub>2</sub> during HCO<sub>3</sub><sup>-</sup>-  
59 dependent carboxylation reactions. Biotinylation is therefore a relatively rare *in vivo* protein  
60 modification. Moreover, biotinylated proteins can be selectively isolated with high avidity  
61 using streptavidin-biotin pairing. PDL therefore permits the identification of both high and low  
62 affinity interactions.

63 Analogues to DamID in which a prokaryotic *Dam* methylase is fused to a protein of  
64 interest to monitor DNA-protein interactions in eukaryotes [2], the principle of PDL allows the  
65 capture of protein-protein interactions. More specifically, PDL is based on the fact that native  
66 biotin ligases, e.g. the *Escherichia coli* BirA catalyzes a two-step reaction: first, the generation  
67 of reactive biotinyl-AMP (biotinoyl-5'-AMP or bioAMP) from biotin and ATP, and second,  
68 the attachment of that bioAMP to a specific lysine of the target protein. Engineered PBLs have  
69 a significantly reduced affinity for the reactive bioAMP intermediate [3, 4]. This intermediate  
70 is prematurely released and, due to its high reactivity, will interact with neighbouring primary  
71 amines (e.g., lysine). Therefore, these variants lead to promiscuous labelling despite their lower  
72 affinity for biotin compared to native biotin ligases.

73 There are several variations of PDL. The first-generation enzymes used for PDL are  
74 based on the *E. coli* biotin ligase BirA [5]. The mutant BirA, designated BirA\* (R118G) [6],  
75 referred hereafter as BioID, a monomeric protein of 35.3 kDa, was the first PBL variant used  
76 for PDL [3, 4, 7]. A second-generation PBL, called BioID2, was derived from the *Aquifex*  
77 *aeolicus* biotin ligase [3]. BioID2, which naturally lacks a DNA-binding domain, is  
78 approximately one-third smaller than BioID, potentially reducing sterical hindrance of the bait  
79 protein [8]. The third-generation PBLs, called TurboID and mini TurboID (mTurboID), are  
80 derived from directed evolution of BirA\* expressed in yeast. These two variants showed  
81 maximal activity at 30°C, while the previous variants show maximal activity at higher  
82 temperatures [9]. TurboID has the same size as the original BirA\* tag, albeit with 14 amino  
83 acid mutations that greatly increase its labelling efficiency. mTurbo has 12 out of 14 of those

84 mutations. The N-terminal DNA-binding domain was deleted to reduce its size (28 versus 35  
85 kDa), which also slightly impacted on its labelling efficiency by reducing it ~2-fold. The first  
86 and second-generation PBLs required approximately 18 to 24 h of labelling (and sometimes  
87 even much longer) to produce detectable levels of protein biotinylation, while the TurboID  
88 variants required a labelling time only in the range of 1 h or less in the various eukaryotic, non-  
89 plant systems tested so far [9].

90 PDL has its own intrinsic advantages and limitations. In the presence of biotin, the bait-  
91 PBL fusion protein labels proximal proteins without the activation by a conditional trigger,  
92 thereby keeping track of all interactions that occurred over a time-period. The ability for  
93 selective capture makes the method generally insensitive to protein solubility or protein  
94 complexation, with obvious applicability to membrane proteins and cytoskeletal constituents,  
95 a major advantage over alternative approaches. Nevertheless, the identity of a candidate  
96 interactor does not immediately imply a direct or indirect interaction with the bait but could  
97 merely reflect close proximity [estimated to be ~10 to 15 nm [10]]. Furthermore, true  
98 interactors (false negatives) are missed if they lack accessible primary amines.

99 So far PBLs have successfully been used in yeast [11], protozoa [12], amoebae [13],  
100 embryonic stem cells [14], and xenograft tumors [15] to map a wide range of interactomes in  
101 both small-scale (i.e. single bait protein) and large-scale network mapping approaches (i.e. the  
102 protein interaction landscape of the centrosome-cilium interface and the organization of  
103 mRNA-associated granules and bodies (mRNP complexes)) [16, 17].

104 In plants, PBLs have not been extensively used. So far, four papers describe the  
105 application of PDL in plants [18-21]. In these first trials, overexpression of a first-generation  
106 BirA\* was used combined with long labelling times, very high biotin levels and relatively poor  
107 labelling efficiencies. These results, combined with the so far non-extensive use of PDL in  
108 plants could suggest that BioID variants used so far show reduced activity in plant tissues due  
109 to suboptimal working temperatures with reference to their temperature-activity profiles.

110 Here, we report a systematic multi-lab study of different PDL approaches in various  
111 plant systems. We provide guidelines for the use of PDL in various frequently used plant  
112 models suggesting most relevant shortcomings and contingencies. Furthermore, we benchmark  
113 our PDL methods studying the TPLATE protein complex. We foresee that the methods, tools  
114 and produced materials will greatly benefit the research community.

115  
116  
117

118 **RESULTS**

119 ***Increased PBL-mediated biotin labelling efficiencies upon biotin administration in planta***

120 In non-plant systems, supplementation of biotin is important for efficient proximity biotin  
121 ligation with all the PBLs tested so far. In contrast, plants synthesize biotin endogenously and  
122 thus the intracellular pool of biotin might be high enough for the PBL. In fact, free biotin has  
123 been shown to accumulate in the cytosol of plant mesophyll cells to a high concentration of ca.  
124 11  $\mu\text{M}$  [22], while for example in yeast this is more than 10-fold lower [23]. Considering that

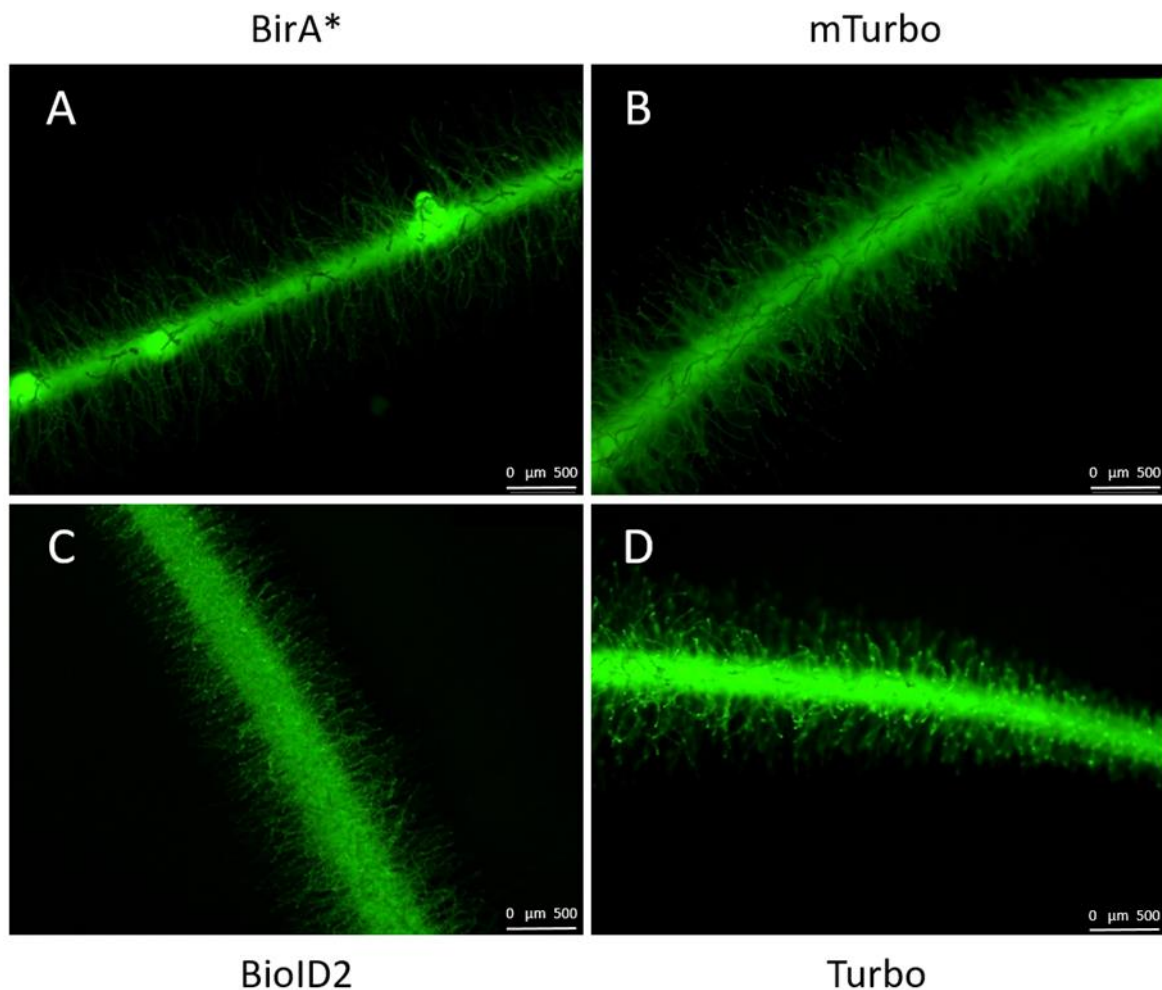

**Figure S1. GFP expression in tomato hairy root cultures produced with rhizogenic *Agrobacterium*.** Fluorescence micrograph images of eGFP expression were obtained from primary hairy roots (~14 days) transformed rhizogenic *Agrobacterium* with the following expression constructs; Pro35S::eGFP-BirA\*, Pro35S::eGFP-BioID2, Pro35S::eGFP-TurboID, and Pro35S::eGFP-miniTurboID. The scale bars are 500  $\mu\text{m}$ . Images are representative for the four to ten independent roots selected for subcultivation and showing expression of the marker per construct.

125 the  $K_m$  of BirA\* for biotin is 0.3  $\mu\text{M}$ , this could, in theory, lead to efficient PDL even in the  
126 absence of exogenous biotin supplementation.

127 We thus tested biotinylation efficiency in the presence or absence of biotin using  
128 different tagged PBLs as fusion proteins, either codon-optimized for plants or non-codon  
129 optimized (**Supplemental Table 1 and Supplemental File 1**). More specifically, we  
130 comparatively screened the potential applicability of enzyme-catalyzed proximity labelling  
131 when using the PBL BirA\* [5, 8], BioID2 [8], TurboID or mTurboID [9]. We first tested these

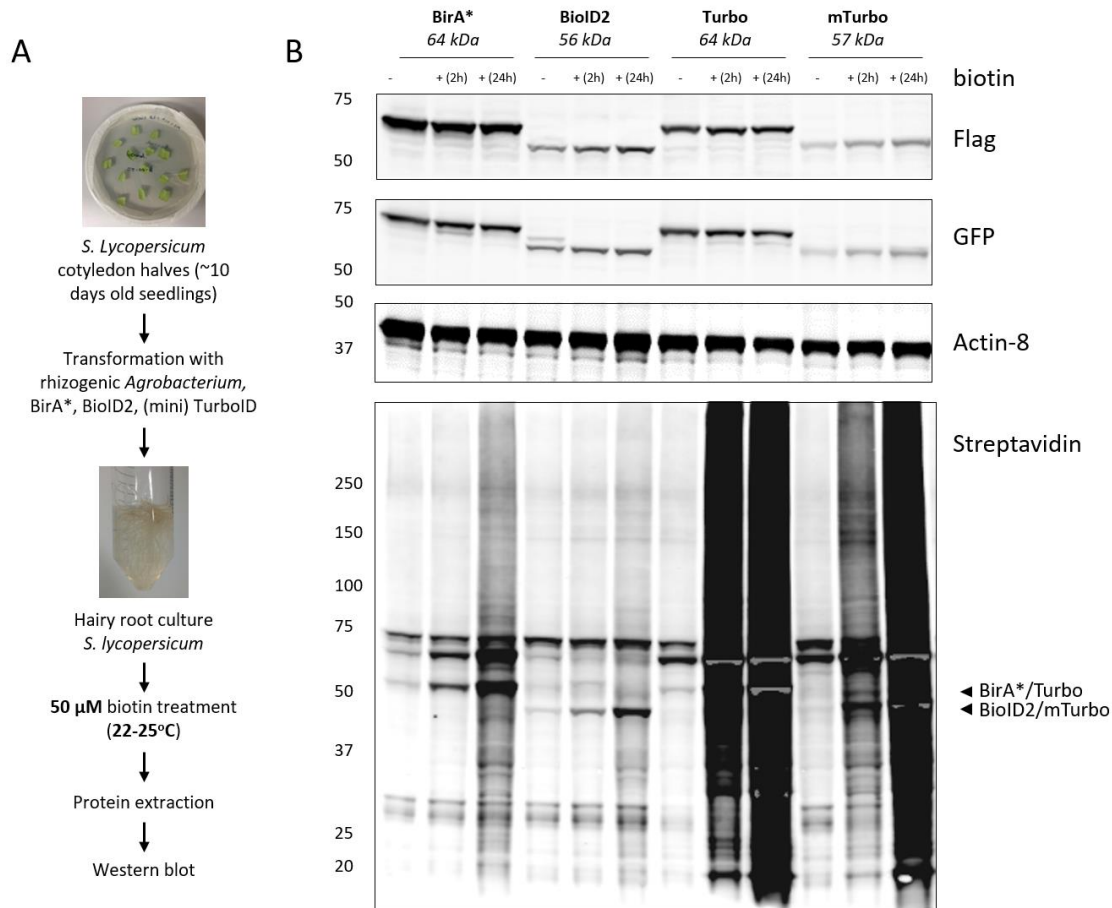

**Figure 1. Characterization of enzyme-catalysed proximity labelling in hairy root cultures.** (A) Experimental setup. (B) Comparison of biotinylation activity in four PBL-expressing hairy root cultures. Addition of 50  $\mu$ M exogenous biotin to two-weeks old hairy root cultures for 2 or 24 h was used for labelling. Arrowheads indicate the expected size of the cis-biotinylation signal. (B) Comparison of biotinylation activity in four PBL hairy root cultures from wild-type tomato expressing eGFP.BirA\* (~66 kDa), eGFP.BioID2 (~56 kDa), eGFP.Turbo (~64 kDa) and eGFP.miniTurbo (~57 kDa). Gray regions in intense black areas represent saturation of the streptavidin-s680 signal and is most prominent in case of self-biotinylation activity. This is a representative experiment repeated twice and two independent root cultures were analyzed per combination.

132 PBLs in stable hairy root lines of *Solanum lycopersicum* (see **Materials and Methods**). For  
133 protein visualisation, we fused the engineered PBL to FLAG and enhanced green fluorescent  
134 protein (eGFP) under control of the constitutive cauliflower mosaic virus (CaMV) 35S  
135 promoter (**Supplemental Figure 1**).

136 As a control for non-bait specific biotinylation, PBL-fused eGFP was used.  
137 Biotinylation, was evident as smears in streptavidin-HRP Western blot. This smear depicts  
138 biotinylation of other proteins than PBLs, and will be referred to as “trans-biotinylation”. As a  
139 proxy of PBL activity, we used the cis-biotinylation efficiency (i.e. auto- or self-biotinylation  
140 level of PBL fusions) as readout (**Figure 1**). Manifold faster kinetics for TurboID and  
141 mTurboID over BioID and BioID2 could be observed (**Figure 1**). This is in line with the  
142 previously reported lower catalytic activities of the latter PBLs, especially at the growth  
143 conditions used (i.e. cultivation of hairy roots was performed at 22-25°C) [9]. Noteworthy,  
144 only residual trans-biotinylation was observed when no exogenous biotin was added.  
145 Therefore, the addition of surplus of (free) biotin seems to function as an inducing agent of  
146 PDL in this system. This observation indicates that PDL in plants to some extent might also  
147 have the capacity to identify the spatiotemporal dynamics of interactome composition.  
148

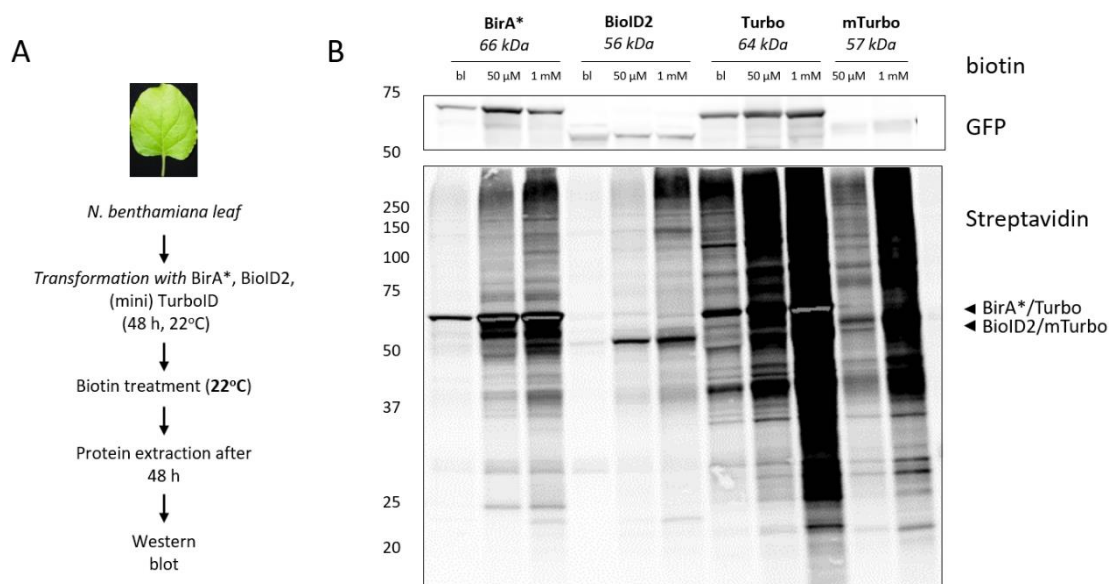

149

**Figure S2 Characterization of PBL-catalysed proximity labelling in *N. benthamiana*.** (A) Experimental setup. (B) Comparison of biotinylation activity in *N. benthamiana* expressing eGPF.-BirA\* (~66 kDa), eGPF-BioID2 (~56 kDa), eGPF-Turbo (~64 kDa) and eGPF-miniTurbo (~57 kDa). Overlapping signal as indicated with a black arrow denote enzyme-catalysed cis-biotinylation. Gray bands in intense black areas represent saturation of the streptavidin-s680 signal and is most prominent in case of auto-biotinylation activity. Two infiltrated tobacco leaf segments/leaves were analyzed per setup and the experiment was repeated twice with similar results.

150

### 151 *PDL-efficiency depends on growth temperatures and PBL can facilitate trans-biotinylation* 152 *in Nicotiana benthamiana*

153 We used transient transformation of *Nicotiana benthamiana* leaf mesophyll cells to test the  
154 applicability of PBL in an alternative system commonly used for protein expression *in planta*

155 under various conditions. In this case, biotin was infiltrated directly into leaf tissue 24 h after  
 156 transfection and harvested 24 h post-biotin infiltration (**Supplemental Figure 2A**). We  
 157 confirmed that also in this system, the highest cis-biotinylation level was observed in the case  
 158 of TurboID, and supplementation of biotin was important for the efficient detection of cis-  
 159 biotinylation (**Supplemental Figure 2B**). Furthermore, the overall biotinylation output in  
 160 tobacco leaves increased when biotin concentration increased from 50  $\mu$ M to 1 mM  
 161 (**Supplemental Figure 2B**).

162 We confirmed that the R118G mutation is responsible for promiscuous labelling in  
 163 plants, as the wild-type BirA showed no trans-biotinylation (in the presence of 50  $\mu$ M  
 164 exogenous biotin; **Supplemental Figure 3A**). Furthermore, a temperature shift from 22°C to  
 165 28°C increased cis- and *trans*-biotinylation for both BioID and TurboID, suggesting that  
 166 temperature control, at least to some extent, could also be used to modulate PDL in plants  
 167 (**Supplemental Figure 3A**, see also below).

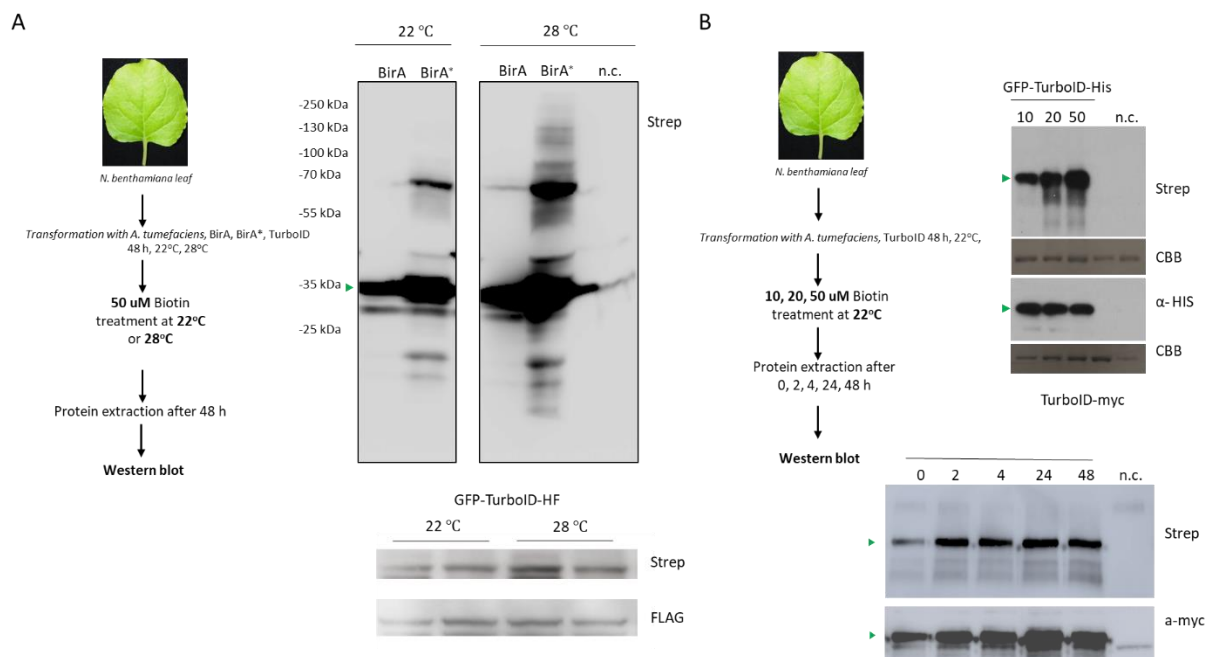

**Figure S3. Biotinylation of BirA\* increases at elevated growth temperature and biotin concentration in *Nicotiana benthamiana*.** (A) Upper blot: The wild-type version of BirA shows residual cis-biotinylation activity at both 22°C and 28°C. BirA\* (BioID) shows promiscuous biotinylation which increases with temperature. Bottom blot: GFP-TurboID-HF activity was ~2 fold increased at higher temperature (i.e. when going from 22°C to 28°C). Two biological replicates are depicted. (B) Increasing biotin levels elevated biotinylation efficiency and efficient cis-biotinylation was observed already 2 h after biotin administration. Green arrowheads show the corresponding BL. N.c. negative control.

168  
 169 Noteworthy, the effect of temperature on TurboID activity was less apparent compared to that  
 170 of BioID, consistent with the temperature-dependency of the two enzymes [9]. Interestingly,  
 171 similar to GFP-TurboID expressed in the hairy root cultures, biotinylation reaches its highest  
 172 cis-biotinylation level already 2 h after biotin administration in *N.benthamiana* (**Supplemental**



173 **Figure 3B**). TurboID and mTurboID were the only PBLs in plants with biotinylation efficiency  
174 occurring in the range of few hours, as other PBLs did not show any visible sign of trans-  
175 biotinylation in that time (**Figure 1 and Supplemental Figure 2**).

176

177 *TurboID can be used for the efficient capture of plasma membrane interactomes in*  
178 *Nicotiana benthamiana*

179 Next, we tested whether we could achieve biotinylation of protein interactors using PDL under  
180 the conditions established for *N. benthamiana*. We observed that the prey proteins used in  
181 plants for BioID so far were relatively small proteins (i.e. HopG, 25 kDa [20], OsFD2 18 kDa  
182 [18], AvrPto 16 kDa [19]). Interestingly, all these proteins have a smaller predicted radius  
183 (assuming a globular shape) than all four PBLs used in the PDL approaches so far.

184 We tested our conditions for PDL using as test-cases plasma membrane-localized  
185 protein complexes with radii within a range of a few nm. First, we used a known membrane  
186 receptor complex from *Lotus japonicus* comprised of two symbiotically active receptor  
187 kinases: The LysM-type RLKs NOD FACTOR RECEPTOR 5 (NFR5) and the LRR-RLK  
188 SYMBIOTIC RECEPTOR-KINASE (SYMRK). These proteins assemble within the same  
189 complex in *L. japonicus* roots [24] as well as in *N. benthamiana* upon heterologous expression  
190 [25]. In contrast, the brassinosteroid receptor BRASSINOSTEROID INSENSITIVE 1 (BRI1)  
191 was shown not to be involved in this interaction as co-IP results failed to identify BRI1 in these  
192 experiments [25]. To further extend the set of control proteins, we additionally cloned the *A.*  
193 *thaliana* innate immune pattern recognition receptors FLAGELLIN SENSING 2 (FLS2) and  
194 the EF-TU RECEPTOR (EFR), both belonging to the LRR-family, as well as the LOW  
195 TEMPERATURE INDUCED PROTEIN LTI6b that is commonly used as a bona fide plasma  
196 membrane marker in plant cell biology [26].

197 We first co-expressed the symbiotic receptors NFR5 and SYMRK as C-terminal GFP  
 198 fusion proteins with a cytosolic TurboID-GFP in *N. benthamiana*. Immunoprecipitation and  
 199 Western Blot analysis revealed the successful expression and pull-down of all three proteins  
 200 (**Figure 2A**). When probing for biotinylation levels, we exclusively detected self-biotinylation  
 201 in case of cytosolic TurboID-GFP (**Figure 2A**). However, prolonged exposure of the blot  
 202 resulted in weak detectable bands in case of NFR5-GFP and SYMRK-GFP indicating the  
 203 presence of some background *trans*-biotinylation. To test whether *trans*-biotinylation of known  
 204 interacting proteins can be observed, we generated an NFR5-TurboID and co-expressed it with  
 205 SYMRK-GFP. Here, we not only detected a clear *cis*-biotinylation of NFR5-TurboID but also  
 206 *trans*-biotinylation of SYMRK (**Figure 2B**). These data show that specific *trans*-biotinylation  
 207 occurs within a known receptor complex.

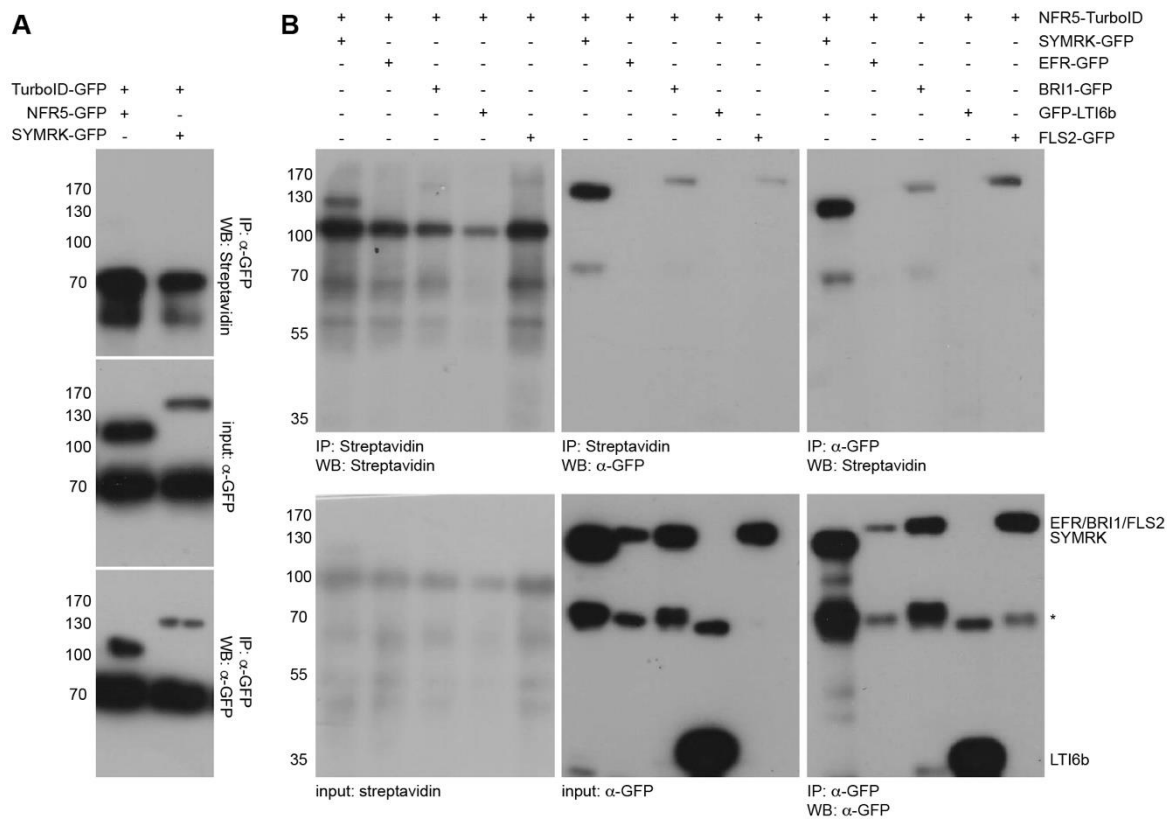

**Figure 2. Trans-biotinylation within membrane-resident receptor complexes.** (A) TurboID-GFP was co-expressed with symbiotic RLKs to test for unspecific *trans*-biotinylation. While all proteins were detected before (middle panel) and after immunoprecipitation (lower panel), no *trans*-biotinylation of the receptors was observed under these conditions (upper panel). The activity of TurboID is indicated by self-biotinylation of TurboID-GFP (70 kDa). (B) Fusing TurboID to NFR5 (120 kDa) resulted in strong *trans*-biotinylation of the known interaction partner SYMRK (150 kDa), weak signals were detected in case of the PM-resident receptors BRI1 and FLS2, while no *trans*-biotinylation of EFR and the PM-marker LTI6b were detected. IP= immunoprecipitation; WB= Western Blot. \*= unclassified band.

208 To test for specificity in the assay, we co-expressed NFR5-TurboID additionally with  
209 the functionally unrelated transmembrane RLK BRI1, which was previously shown to not  
210 interact with the NFR5/SYMRK complex using co-IP [25]. While we detected strong BRI1  
211 expression, this protein was only weakly *trans*-biotinylated by NFR5-TurboID indicating some  
212 unspecific labelling or that the protein is in proximity to the complex (**Figure 2B**). To broaden  
213 this, we also co-expressed the transmembrane proteins FLS2, EFR and LTI6b with NFR5-  
214 TurboID. While no bands were detected for EFR and LTI6b, we observed some weak signal  
215 for FLS2 indicating that this receptor may locate in close proximity to NFR5 (**Figure 2B**).  
216 Prolonged exposure of the blots yielded some weak signal for all membrane proteins as also  
217 observed for GFP-TurboID (**data not shown**). However, these signals were orders of  
218 magnitude lower than those detected for NFR5/SYMRK. This assay was further optimized by  
219 temporally limiting the reaction. We could show that *trans*-biotinylation efficiently occurs  
220 within 15 min after applying exogenous biotin, demonstrating that specificity is maintained by  
221 minimizing the availability of the substrate (**Supplemental Figure 4**).

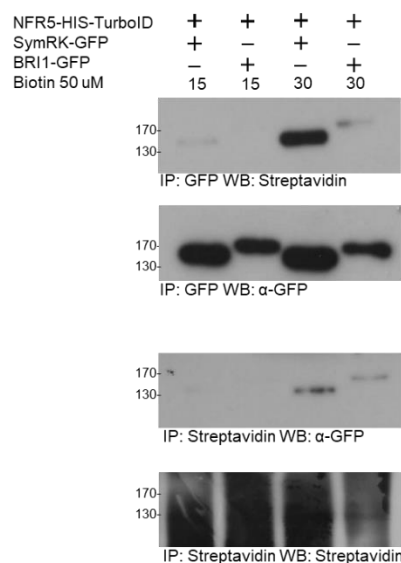

**Figure S4. Temporally limiting the reaction results in weak but specifically detectable bands in case of NFR5-TurboID and SYMRK-GFP.** Biotin was applied for 15 or 30 min. IP= immunoprecipitation; WB= Western Blot.

222 It should also be considered that in addition to ectopic expression of the constructs, the weak  
223 dimerization potential of GFP here or other protein tags with similar properties may result in  
224 potentially unspecific *trans*-biotinylation.

225 Taken together these data clearly show that TurboID-mediated PDL can be efficiently  
226 used for membrane proteins. It can be advantageous over other methods such as co-  
227 immunoprecipitation as it does not require any optimization of the solubilization conditions  
228 and it provides the possibility to detected transiently protein complex constituents.

229 **Application of PDL in *Arabidopsis thaliana* cell cultures using the TPLATE complex as a**  
230 **case study**

231 Next, we surveyed the efficiency of *trans*-biotinylation for a stable multi-subunit plant protein  
232 complex. As a test case, we took the plasma membrane-associated octameric TPLATE  
233 complex (TPC) [27] and used stably transformed *A. thaliana* culture cells as a third model  
234 system.

235 Given the higher biotinylation level observed in *N. benthamiana* at 28°C  
236 (**Supplemental Figure 3**) we tested different labelling conditions using *A. thaliana* suspension  
237 cell cultures. We grew the cells expressing TPLATE-BioID and GFP-BioID, i.e. proteins fused  
238 to the initial version of BirA\*, at various temperatures in the presence of 50 µM biotin for 24  
239 h. We subsequently isolated the complex using streptavidin affinity purification (see **Materials**  
240 **and Methods**), performed tryptic on-bead digest and analyzed the released non-biotinylated  
241 peptides using LC-MS/MS.

242

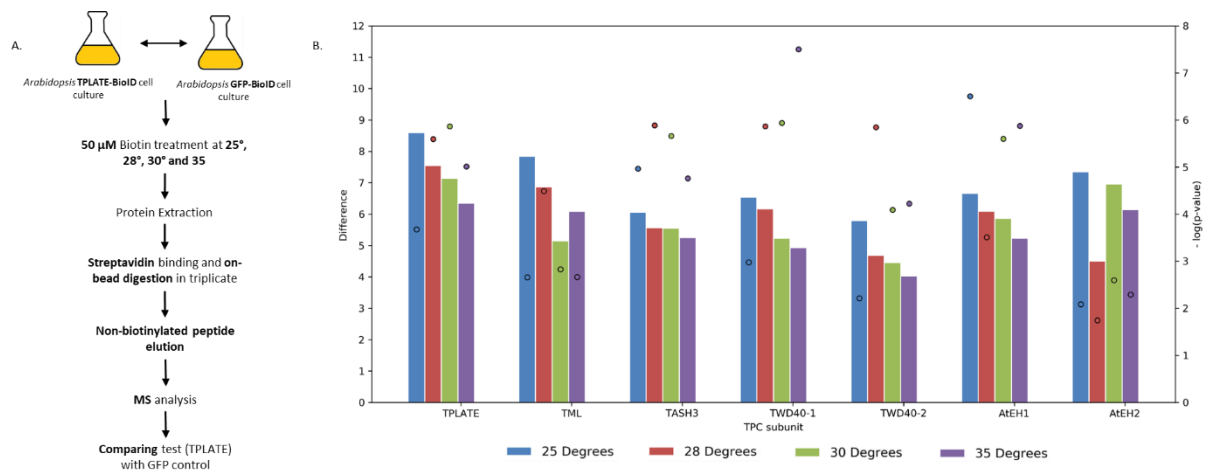

243

**Figure 3. Detection of TPC subunits with TPLATE-BioID is optimal at 28° C.** (A) Experimental setup to look for enriched TPC subunits in biotin treated transformed *Arabidopsis* cell cultures. (B) Fold change abundance of the TPC subunits and statistical significance (-log(p-value)) compared to control. Fold change and p-values were calculated from the average LFQ intensities for 3 technical replicates of TPLATE-BioID w.r.t. versus GFP-BioID at similar temperature. Cell cultures were incubated with 50µM biotin at 25°-35°C for 24 h before harvesting. The TPC subunits are detected at all 4 temperatures without major differences. At 28°C and 30°C, the overall detection of several of the other subunits shows increased robustness (p-value) compared to both the lower (25°C) and higher (35°C) temperatures.

244

245 In order to compare the effect of temperature on the biotinylation efficiency to  
246 identification of proteins from isolated protein complexes, we focused on the other seven  
247 TPLATE complex members and compared their abundance and fold changes after streptavidin-  
248 purification as deduced from label-free protein quantification (LFQ; [28]) to the control setup  
249 (35S::GFP-BioID) (**Figure 3A**). The fold change difference with respect to the control for the

250 other TPC subunits was subunit dependent and not dramatically different between the different  
 251 temperatures. The highest overall fold change difference for the different subunits, combined  
 252 with the optimal robustness of the identification (p-value) was detected at 28°C (**Figure 3B,**  
 253 **Supplemental Data Set 1**), indicating that this temperature presents the optimal trade-off  
 254 between biotinylation efficiency of BioID and perturbation of physiological processes due to  
 255 elevated temperatures.

256

257 ***Various PBLs affect biotinylation of TPC subunits differently***

258 The introduction of a flexible linker has been successfully used to extend the labelling radius  
 259 of PBLs [8], which is estimated to be about 10 to 15 nm [10]. This increased labelling radius  
 260 may be desirable when the protein of interest is significantly larger than the labelling radius of  
 261 the PBL alone, and/or when the goal is to map the constituency of a larger protein complex or  
 262 discrete subcellular region. We thus compared the efficiencies of various PBLs and assessed  
 263 their biotinylation radius by inserting a long flexible linker. For this, *Arabidopsis* cultures  
 264 expressing C-terminal fusions of TPLATE with BioID or BioID2 were assessed, with and  
 265 without a 65 aa linker similar to the one that was reported before [5]. As controls, we generated  
 266 GFP fused to BioID or BioID2 without additional linker (**Supplemental Figure 5**).

267

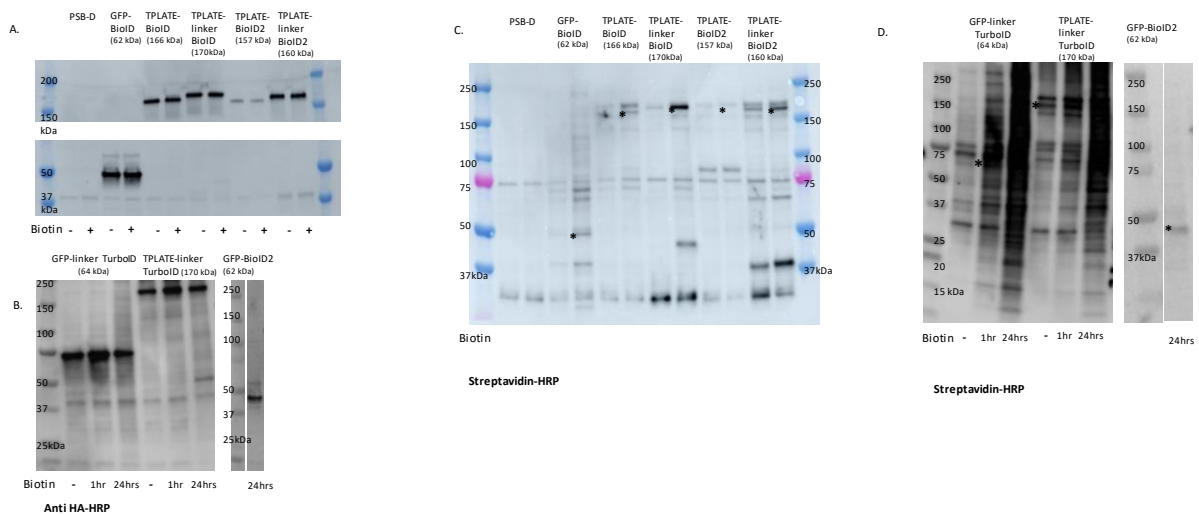

268

**Figure S5. Different PBL cause different self- and trans- biotinylation.** Cell cultures expressing different TPLATE-PBL were incubated with 50µM biotin at 28°C for 1 h and 24 h before harvesting. (A and B) Anti-HA HRP western blotting was performed to visualize expression levels of the different cultures. (C and D) Streptavidin-HRP western blotting of different TPLATE-PBLs, GFP-BioID and control cell cultures (PSB-D). Self-biotinylation of the bait and *trans*-biotinylation can clearly be observed. \* indicates self-biotinylation of the bait.

269

270           Next, we tested the activity of different PBLs in this system. We grew the cultures for  
271 24h at 28°C, with and without exogenous biotin, and assessed expression and biotinylation via  
272 Western blotting (**Supplemental Figure 5**). Protein abundance of the BioID and BioID2  
273 constructs was comparable to their respective controls in our cell cultures and not affected by  
274 the addition of biotin. Only the levels of TPLATE-BioID2 were somewhat lower. At the level  
275 of cis- and *trans*-biotinylation, we observed different patterns for each of the enzymes used.  
276 As several of the detected bands which increased significantly in the presence of biotin, did not  
277 correspond to bands in the control (PSB-D) or GFP-BioID culture, they likely represent  
278 different *trans*-biotinylated interactors and suggest that the outcome of a BioID-based  
279 interaction assay might (partially) depend on the PBL used. TPLATE-linker PBL showed the  
280 most diverse biotinylation pattern when comparing to the other setups expressing BioID and  
281 BioID2 fusions (**Supplemental Figure 5**) suggesting that adding a linker may be used to to  
282 optimize proximity labelling. Consistent with the results described for tobacco, linkerTurboID  
283 constructs showed some biotinylation without the addition of exogenous biotin, increased  
284 biotinylation after 1 h incubation with biotin and extensive biotinylation after 24 h incubation  
285 with biotin in both control and bait cultures suggesting it is highly promiscuous.

286

287           As observed in *N. benthamiana* (**Supplemental Figure 2**), BioID outperformed BioID2  
288 using TPLATE as bait in this system, although this might be skewed due to lower expression  
289 levels of the latter. Adding a flexible linker increased self-biotinylation levels of the bait  
290 compared to the constructs without linker (**Supplemental Figure 5A and C**). Our results are  
291 consistent with previous observations in non-plant systems suggesting that linkers increase the  
292 biotinylation output [8].

293           Following the positive effect of exogenous biotin supplementation (**Supplemental**  
294 **Figures 2 and 3**), we tested the effect of increasing biotin concentrations on cis-biotinylation  
295 efficiency. Cell cultures expressing TPLATE-linkerBioID were grown at 28°C in the presence  
296 of increasing concentrations of biotin (50 µM to 4 mM) and processed for Western blotting.  
297 Supplementing the culture with concentrations of biotin in the range of 50 uM to 1 mM  
298 increased cis-biotinylation output up to a maximum of ~2-fold (Supplemental Figure 6).  
299 Increasing biotin concentration >2mM did not further increase the cis-biotinylation efficiency.

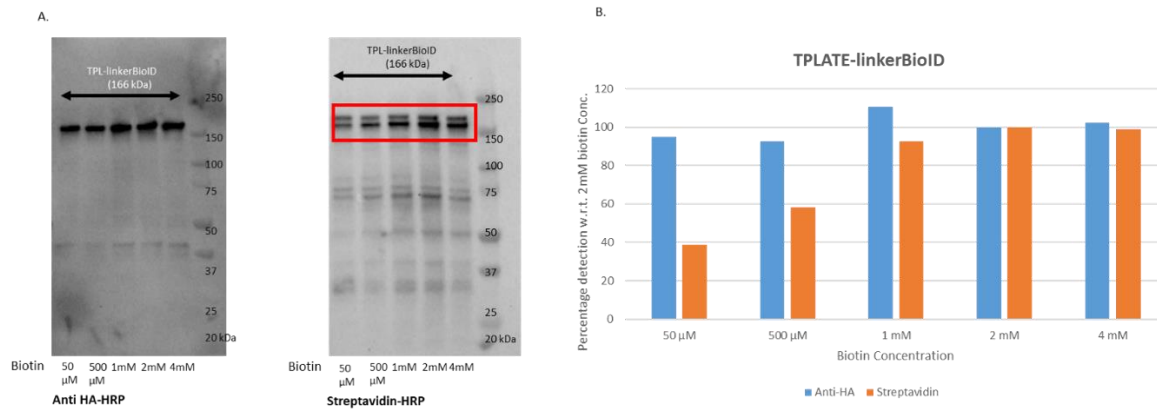

**Figure S6. Cis-biotinylation of TPLATE-linkerBioID increases at higher concentration of exogenous biotin.** Cell cultures expressing TPLATE-linkerBioID were incubated with biotin (50 $\mu$ M to 4mM) at 28 $^{\circ}$ C for 24 h. (A) Anti-HA HRP western immunostaining was performed to check protein expression while streptavidin-HRP western immunostaining was used to assess the biotinylation levels of TPLATE-BioID. (B) Quantification of the percentage of biotinylation (orange) as well as the expression (blue) for each biotin concentration compared to the maximum biotinylation efficiency (2mM) using ImageJ.

300

301 We took advantage of the increased biotinylation observed by including a long linker  
302 sequence and generated *Arabidopsis* cultures expressing GFP-linkerTurboID and TPLATE-  
303 linkerTurboID. Similar to other systems, 24 h post-biotin addition, TurboID efficiency strongly  
304 outperformed all other PBLs tested as evident from the high biotinylation levels observed with  
305 and without the addition of exogenous biotin and for both the control (GFP) as well as the  
306 TPLATE expressing cultures (**Supplemental Figure 5B and D**).

307 In order to compare the different PBL modules, we processed the cell cultures for LC-  
308 MS/MS and focused on the relative levels of the various TPC subunits compared to the control  
309 setup. Our first mass spec results following streptavidin pull down and on-bead digestion  
310 identified all known subunits of the TPC. Given that this is a robust multi-subunit complex [27]  
311 and that we identify only non-biotinylated peptides with our on-bead digestion protocol, we  
312 assumed that the subunits we detect are a combination of direct biotinylation as well as co-  
313 immunoprecipitation of the complex as a whole. To test this, we adapted our protocol (**Figure**  
314 **4A**) and included protein extraction and stringent washing steps with a buffer containing 8M  
315 urea and 2% SDS to unfold proteins captured by the beads and to be able to remove unspecific  
316 protein binders. We also included the TPLATE-linkerBioID setup treated with 2 mM biotin for  
317 24 h to assess if increased biotin concentration improves TPC subunit detection.

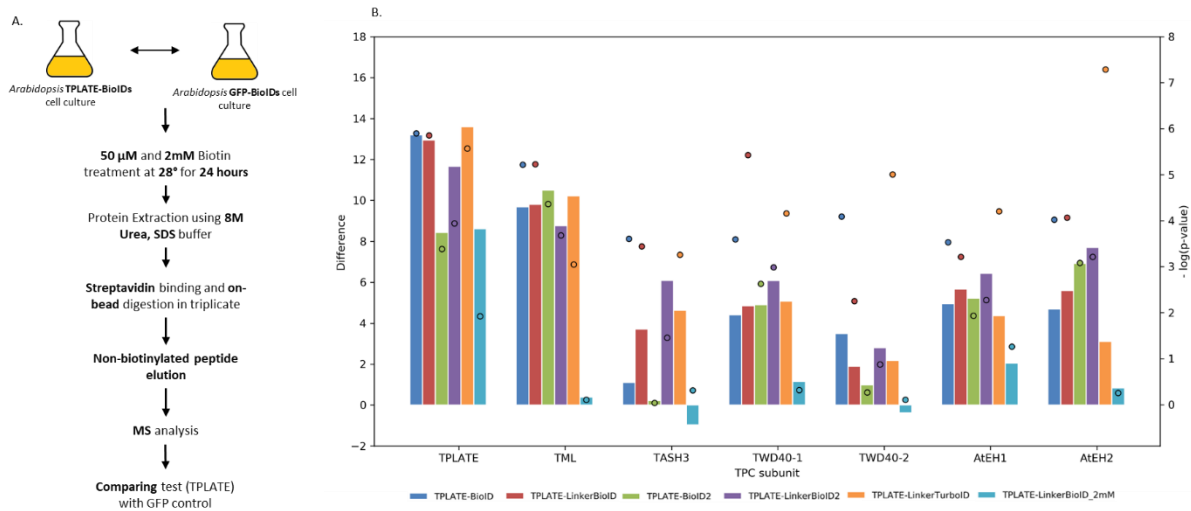

318

**Figure 4. Different TPLATE-PBLs affect biotinylation of TPC subunits differently.** (A) Experimental setup. (B) Comparison of the relative fold change and statistical significance ( $-\log(p\text{-value})$ ) compared to control samples for the various PBLs and conditions. Relative fold change and p-values were calculated from the average LFQ intensities of 3 technical replicates of the test compared to the control. GFP-BioID served as a control for TPLATE-BioID and TPLATE-linkerBioID while GFP-BioID2 is a control for TPLATE-BioID2 and TPLATE-linkerBioID2 and GFP-linkerTurboID is the control for TPLATE-linkerTurboID.

319 In agreement with the higher stringency of the isolation procedure, the smallest TPC subunit,  
320 LOLITA, which could be robustly detected using AP-MS [27] and could be detected without  
321 being denatured prior to binding to streptavidin beads, was no longer detected (**Figure 4,**  
322 **Supplemental Data Set 2**). LFQ revealed that the remaining seven TPC subunits, including  
323 the bait TPLATE, could be detected using BioID, linkerBioID, linkerBioID2 and  
324 linkerTurboID. The TASH3 and TWD40-2 subunits could however hardly be detected using  
325 BioID2, which might be caused by the reduced expression level of the bait observed in these  
326 cultures (**Supplemental Figure 5**). Increasing the concentration of biotin to 2mM had an  
327 adverse effect on the detection of the TPC subunits as only the bait itself could be identified. It  
328 is likely that increasing biotin concentrations causes residual free biotin to accumulate in the  
329 protein extract, even after protein desalting to deplete free biotin, thereby occupying the  
330 streptavidin binding sites on the beads (saturated at  $>9 \mu$ M of biotin). We tested this “saturation  
331 hypothesis” using *N. benthamiana* leaves and protein precipitation to completely remove  
332 residual biotin, showing that even low concentration of residual biotin can saturate the  
333 streptavidin beads and incapacitate detection (**Supplemental Figure 7**). Hence, special care  
334 should be taken to avoid excess of residual free biotin during streptavidin-capture.



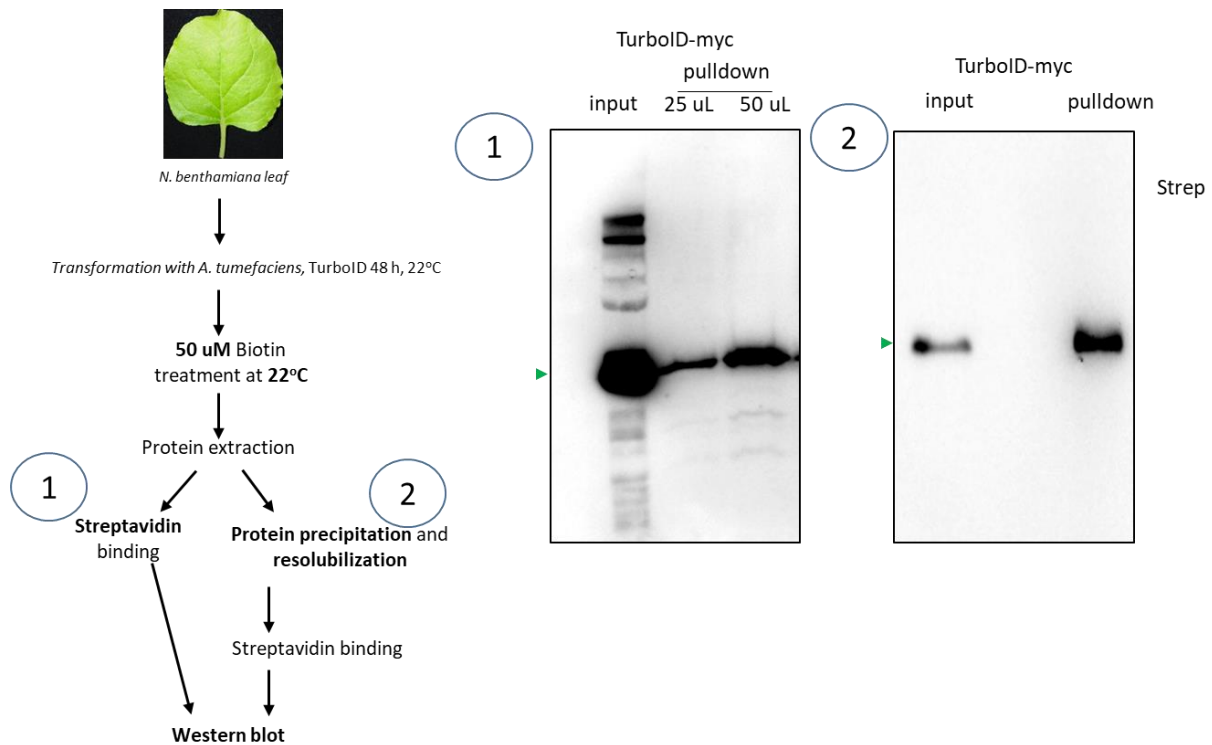

335

**Figure S7. Exogenous application of biotin can exceed the binding capacity of streptavidin beads.** Blot on the left: input and IP with streptavidin using 25 or 50 ul of beads. Note that 2 x more beads increased the recovery of the input signal, suggesting that the beads are saturated. Blot on the right: IP with 25 ul of streptavidin beads but in this case the supernatant was precipitated using ammonium acetate to remove excess biotin. Green arrowheads mark the position of the BL.

336

337 It should be noticed that the fold change by which the other TPC subunits were detected with  
338 TurboID was only similar or even sometimes lower (e.g. AtEH2) compared to the other BioID  
339 forms (Figure 4). This was caused by the fact that TPC subunits were identified more in the  
340 TurboID control samples, resulting in the lower relative fold changes. All individual TPC  
341 subunits were detected with more than 20 unique peptides using the GFP-linkerTurboID  
342 whereas TWD40-2 was the only TPC subunit detected in other GFP-PBLs, which explains its  
343 overall low fold change (**Supplemental Table 3**). Nevertheless, TurboID identified the other  
344 TPC subunits more robustly compared to the other PBLs. So, although in our case, TurboID  
345 showed to be superior to all others in identifying the other TPC subunits, the lower signal/noise  
346 ratio of TurboID, due to its increased activity, might work as a disadvantage to observe  
347 differences between bait proteins and control samples, which might even be enhanced if the  
348 proteins are targeted to specific subcellular locations.

349

350

**Supplemental Table 3: Cell cultures expressing different TPLATE-PBLs identifies TPC subunits with different amount of non-biotinylated peptides.** The table shows the amount of non-biotinylated peptides identified for TPC subunits in GFP and TPLATE-BioIDs PBL cell cultures. Preparation of samples for LC-MS/MS involved the use of a buffer containing 8M Urea and 2% SDS. Cell cultures were incubated with either 50µM or 2mM biotin for 24 hours before harvesting. This table shows higher amount of peptides detected for all TPC subunits in case of linkerTurboID constructs than other BioIDsPBL. Also, it show higher amounts of peptides detected in TurboID control experiments (GFP-linkerTurboID vs. GFP-BioID and GFP-BioID2) suggesting increased promiscuity of TurboID.

| Total number of non-biotinylated peptides identified for each TPC subunit |            |            |            |            |            |            |             |
|---------------------------------------------------------------------------|------------|------------|------------|------------|------------|------------|-------------|
|                                                                           | AT1G20760. | AT1G21630. | AT2G07360. | AT3G01780. | AT3G50590. | AT5G24710. | AT5G57460.1 |
|                                                                           | AtEH1      | AtEH2      | TASH3      | TPLATE     | TWD40-1    | TWD40-2    | TML         |
| SUM TPLATE linkerTurboID                                                  | 76         | 158        | 205        | 384        | 228        | 374        | 116         |
| SUM GFPlinkerTurboID                                                      | 40         | 98         | 122        | 27         | 102        | 271        | 21          |
| SUM TPLATE BioID                                                          | 20         | 32         | 2          | 428        | 68         | 95         | 37          |
| SUM TPLATE linkerBioID                                                    | 19         | 37         | 15         | 540        | 35         | 34         | 16          |
| SUM GFP BioID                                                             | -          | -          | -          | -          | -          | 26         | -           |
| SUM TPLATE BioID2                                                         | 9          | 30         | -          | 157        | 42         | 38         | 51          |
| SUM TPLATE linkerBioID2                                                   | 24         | 55         | 59         | 453        | 107        | 89         | 38          |
| SUM GFP BioID2                                                            | -          | -          | 6          | -          | -          | 42         | -           |
| SUM TPLATE linkerBioID 2mM                                                | -          | -          | -          | 10         | -          | -          | -           |

351

352 *The structural composition of protein complexes causes differences in detection between*  
 353 *PDL and APMS*

354 We compared the stoichiometry by which the different TPC subunits are detected using PDL  
 355 using our stringent washing protocol with our one step IgG pull down protocol using the GS<sup>rhino</sup>  
 356 TAP tag. To do this, we normalized the LFQ intensities for each TPC subunit to TPLATE and  
 357 compared the values of TPLATE-linkerBioID, TPLATE-linkerBioID2 and TPLATE-  
 358 linkerTurboID with those coming from tandem affinity tag (TAP)-fused TPLATE (TPLATE-  
 359 GS<sup>rhino</sup>). Compared to the bait protein (TPLATE), the other TPC subunits are detected with  
 360 small differences in relative abundance between the different subunits in one-step-purification  
 361 MS as well as with PDL which showed the same trend. (**Figure 5, Supplemental Data Set 3**).  
 362 Our results, comparing BioID, BioID2 and TurboID, each fused to TPLATE and having a long  
 363 linker in-between reveal that TurboID allows identifying the other subunits with higher  
 364 enrichment compared to the other PBLs. The smallest subunit, LOLITA, could only be  
 365 identified via TAP-MS, which points out that this subunit is not biotinylated although it  
 366 harbours 11 lysine residues. Our results furthermore reveal that, except for LOLITA, all TPC  
 367 subunits, which are part of a protein complex in the range of 1MDa can be identified using our  
 368 stringent wash protocol as proxy for biotinylation. For example, using TPLATE as bait and  
 369 using a long linker sequence linking it to the PBL, the TASH3 subunit was detected with 15  
 370 peptides instead of 2 in the absence of the linker (**Supplemental Table 3**).

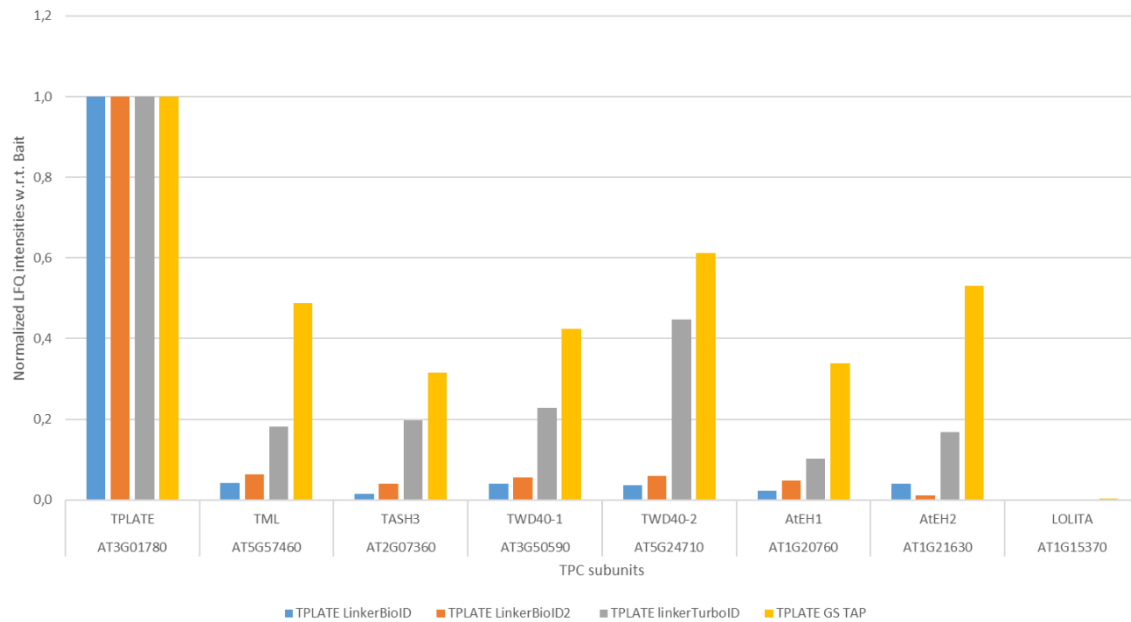

**Figure 5. Comparison of relative abundance of TPC subunits in pull down and BioID.** Pull down and LinkerBioIDs experiments were performed in triplicate, using TPLATE as bait. Per set of experiments, average LFQ intensities were calculated for each of the TPC subunits. Values were normalized versus the bait, TPLATE, taking into account the molecular weight of the TPC subunit. Normalized LFQ values show small differences in relative abundance of the TPC subunits, both in pull down and BioID.

371

372 ***Identification of biotinylated peptides allows identifying structural relationships between***  
373 ***complex subunits***

374 The interaction between biotin-streptavidin is strong enough to be retained even under harsh  
375 conditions, e.g, in reductive buffers (**Supplemental Figure 7**). Thus, biotinylated peptides are  
376 expected to be retained on the streptavidin beads even under stringent washing. Following  
377 stringent washing under denaturing conditions, on bead digest will release non-biotinylated  
378 proteins, which can subsequently be identified using LC-MS. This approach, however, does  
379 not provide direct evidence for biotinylation and it relies on the assumption that only  
380 biotinylated proteins remain bound to the beads after the washing steps. To acquire direct proof  
381 of biotinylation MS-based identification of biotinylated peptides is required.

382

383

384

385

386

387

388

389

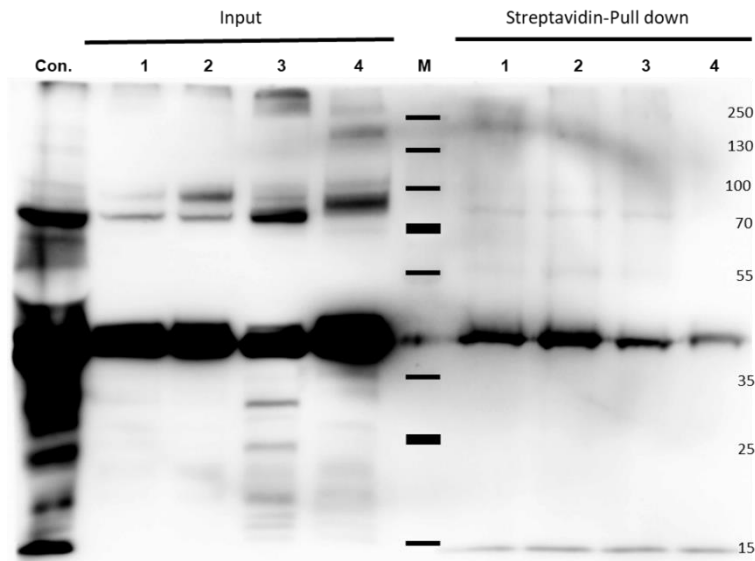

390

**Figure S8. The biotin-streptavidin interaction is retained under harsh conditions.** Different extraction buffers were used for testing the binding affinity of biotin-labelled proteins with streptavidin from equal amount of plant protein material: 1. 50mM HEPES, 150 mM NaCl, 0.5% NP40, 10% Glycerol, 1mM PMSF; 2. 50mM Tris/HCl, 150 mM NaCl, 0.5% NP40, 10% Glycerol, 1mM PMSF; 3. 1x PBST, 1mM PMSF; 4. 2x Laemmli sample buffer (65 mM Tris-HCl, pH 6.8, 20% (w/v) glycerol, 2% SDS, 0.01% bromophenol blue, 10mM DTT). Con: control. M: marker. Note that the lack of enrichment in the pulldown (right panel) is due to the presence of biotin (see also **Supplemental Figure 7**).

391

392 Thus, we expanded the protocol to also be able to identify biotinylated peptides. For this, we  
393 included a second elution step (see **Materials and Methods**) to release the biotinylated  
394 peptides from the beads using an adapted protocol based on [29]. This approach allows  
395 detecting both non-biotinylated as well as biotinylated peptides in the same experimental setup.  
396 We performed the analysis on the TPLATE-linkerTurboID setup and again specifically focused  
397 on peptide identification of the TPC subunits (**Figure 6** and **Supplemental Data Set 4**). The  
398 highest number of biotinylated peptides were identified for TPLATE (44 biotinylated  
399 peptides), followed by TWD40-1 (18), EH2 (16), EH1 (12), TWD40-2 (9) and TML (3). No  
400 biotinylated peptides could be detected for LOLITA, correlating with our previous results.  
401 Mapping non-biotinylated and biotinylated peptides, taking into account their relative  
402 abundance, on the different TPC subunits revealed differences in the number of detected  
403 peptides as well as differences in the distribution of the biotinylated peptides along the length  
404 of the subunits. Whereas the bait, TPLATE, shows a relatively even distribution of biotinylated  
405 peptides along the protein sequence, there is a clear tendency of the EH1, EH2 and TML  
406 subunits towards biotinylation at their C-terminal parts (**Figure 6**). It is tempting to speculate  
407 that the observed distribution of biotinylated peptides, as well as their absence, reflect the  
408 proximity of the domains as well as structural constraints with respect to the bait protein and

409 that proximity biotinylation harnesses the potential to help deduce structural insight into protein  
410 complexes as well as topology information in case of transmembrane proteins.

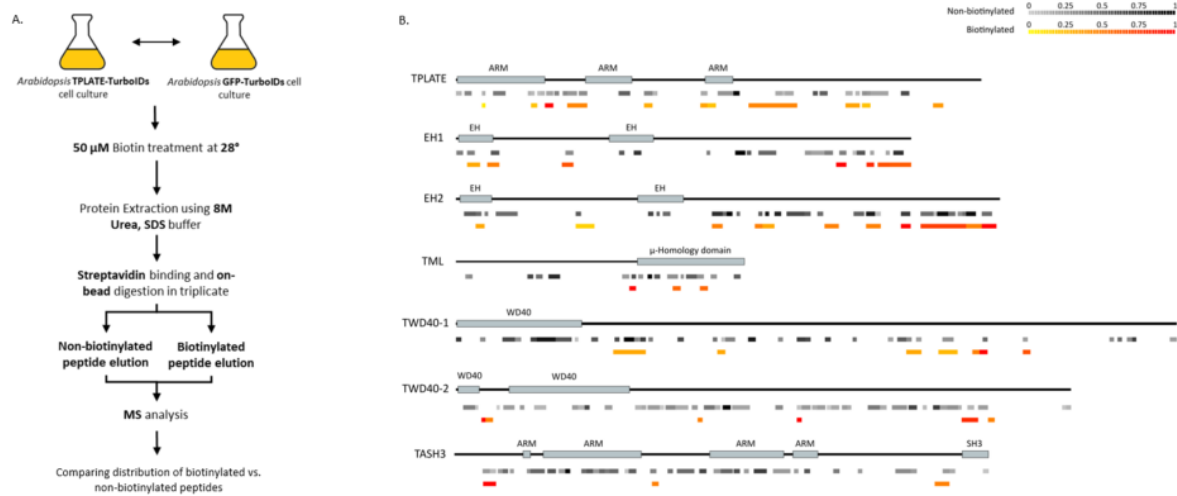

411 **Figure 6. Comparison of biotinylated versus non-biotinylated peptide identification of the various TPC**  
412 **subunits using TPLATE-linkerTurboID as bait. (A) Experimental setup. (B) Overview of the identified**  
413 **peptides and their abundance, mapped onto the different TPC subunits.**

## 414 Discussion

415 We provide a comprehensive comparison of various PBL based proximity labelling strategies  
416 in plants and show that TurboID is the most promiscuous one, and that this also sometimes  
417 leads to a lower signal to noise ratio. We also provide guidelines and approaches for  
418 interactome capture in various plant systems specifically focusing on the ones that interact with  
419 the plasma membrane. Furthermore, we show that for each bait/system conditions need to be  
420 optimized independently.

421 We observed that in all three plant systems, using exogenous application of biotin  
422 enhances PDL output but might not be a strict requirement for the successful application of  
423 PDL. This result seems to contradict with what has been reported for a related method called  
424 INTACT (isolation of nuclei tagged in specific cell types) in plants. This method allows for  
425 affinity-based isolation of nuclei from individual cell types of tissue. INTACT relies on the  
426 endogenous pool of biotin as no exogenous supplementation is required [30]. In INTACT,  
427 nuclei are affinity-labelled through transgenic expression of the wild-type variant of BirA  
428 which biotinylates a nuclear envelope protein carrying biotin ligase recognition peptide from  
429 ACC1. This tag acts as a native substrate for the *E. coli* biotin ligase BirA [31]. The use of  
430 wild-type BirA along with its preferable substrate could explain the higher affinity for the free  
431 biotin pool in INTACT, and the peptide used as fusion is an optimal substrate for the bioAMP

431 intermediate. We assume that various proteins may show variability in functioning as acceptors  
432 of bioAMP (e.g. depending on the presence of accessible lysine residues).

433 PDL utilizing bacterial enzymes poses the question of whether these enzymes could  
434 perform adequately in plants [8]. The activity optimum for BioID2 is 50°C, whereas for BioID  
435 this is 37°C and thus BioID2 may be most adequate for use at higher temperature conditions.  
436 Both temperatures are however far-off from the usual growth temperatures of most plant  
437 species grown in temperate regions (e.g. Arabidopsis sp.). Both BioID2 and BioID show  
438 reduced activity below 37°C ([8] and our results herein). Furthermore, the lower temperature  
439 optimum of TurboID (and mTurboID) [9] would imply that may function better at normal plant  
440 growth temperature. In fact, we observed that TurboID activity is only increased by 2-fold from  
441 22°C to 28°C. We, however, cannot rule out that the optimal temperature for PDL may vary  
442 depending on the bait protein. At all tested temperatures, we observed that TurboID (and  
443 mTurboID) outperforms other PBLs in terms of speed and promiscuity. Hence, TurboID might  
444 be preferable when it comes to initial study of (transient) complex composition where the  
445 generation of as much as possible specific biotinylation output in short time might be desirable.

446 However, the strong promiscuity of the control might also work as a disadvantage in  
447 revealing specific interactions in cases where the reaction cannot be controlled that easily in  
448 time or when both the bait and the control would be targeted to a confined intracellular space.

449 We provide evidence that our methods and conditions are applicable to plasma-  
450 membrane complexes. We showed that the interaction of the symbiotic RLKs NFR5 and  
451 SYMRK can be identified by exploiting PDL and particularly the PBL TurboID. Furthermore,  
452 the use of proper negative controls is imperative. However, even though the brassinosteroid  
453 receptor BRI1 was not co-immunoprecipitated with the symbiotic receptors in a previously  
454 published dataset [25], we detected weak biotinylation of this RLK and the immune-receptor  
455 FLS2. While it could be interpreted as unspecificity within the PBL system, it should also be  
456 considered, that PBL allows labelling of transient interactions or proximal proteins. As a  
457 consequence, continuous unstable interactions accumulate to detectable amounts of proteins  
458 and would thus allow their identification. As PDL using TurboID is capable of *trans*-  
459 biotinylation in the range of minutes (15 minutes under our experimental conditions), the  
460 enrichment of unstable interactions would thus be more prominent. Therefore, putative  
461 interactions identified by PBL still need to be verified using independent experimental systems  
462 but comparisons between the different experimental systems should always reflect the technical  
463 limitations of each approach.

464 By expanding our protocols and PBLs into Arabidopsis cell cultures, we could  
 465 reproduce the composition of the TPC except for one subunit. We show that the use of linkers  
 466 can be advantageous when it comes to identifying protein-protein interactions of multi-subunit  
 467 complexes. Furthermore, TPLATE-linkerBioID2 shows reduced cis-biotinylation compared to  
 468 TPLATE-linkerBioID in the presence of exogenous biotin but seems to function in the absence  
 469 of biotin suggesting that in plants, BioID2 can function in tissues where exogenous  
 470 supplementation of biotin may be slower, e.g. the vasculature. Furthermore, increased biotin  
 471 applications can lead to serious impediments when it comes to the identification of TPC  
 472 subunits as this can interfere with biotinylated protein binding on streptavidin slurries. Caution  
 473 is warranted to assure sufficient capture capacity of biotinylated proteins', since the amount of  
 474 beads needed for capture should be tested for each experimental setup/protocol.

475 Finally, by establishing a strategy for simultaneous identification of biotinylated and  
 476 non-biotinylated peptides we could provide evidence for the accessibility of different protein  
 477 parts to PDL. We show that EH1, EH2 and TML subunits are preferentially biotinylated at  
 478 their C-terminal parts, suggesting that their C-termini are in closer proximity to the C-terminal  
 479 end of TPLATE and/or some domains (even complex subunits) are not available for  
 480 biotinylation. We thus provide evidence that PDL approaches in plants may be able to provide  
 481 structural information of multi-subunit protein complexes and that this may be extended to the  
 482 topology of membrane proteins.

483 While this manuscript was on preparation, two additional works appeared in BioRxiv  
 484 making use of TurboID in plants. These two works complement our work providing further  
 485 evidence that TurboID can be used to capture cell-specific interactomes [32] and transient  
 486 signalling components [33]. Taken together, these three studies provide a new arena for the  
 487 identification of novel protein-protein interactions in plants.

488

489 **Supplemental Table 1: list of constructs used**

| Name                | Vector     | Promoter | Gene   | PBL used                      |
|---------------------|------------|----------|--------|-------------------------------|
| GFP-BioID           | pK7m34Gw   | p35s     | GFP    | BioID                         |
| GFP-BioID2          | pK7m34Gw   | p35s     | GFP    | BioID2                        |
| TPLATE-BioID        | pK7m34Gw   | p35s     | TPLATE | BioID                         |
| TPLATE-BioID2       | pH7m34Gw-R | p35s     | TPLATE | BioID2                        |
| TPLATE-linkerBioID  | pH7m34Gw-R | p35s     | TPLATE | (GGGGG) <sub>13</sub> BioID   |
| TPLATE-linkerBioID2 | pH7m34Gw-R | p35s     | TPLATE | (GGGGG) <sub>13</sub> BioID   |
| GFP linkerTurboID   | pK7m34Gw   | p35s     | GFP    | (GGGGG) <sub>13</sub> TurboID |
| attL2-BioID-attL3   | pG9m-2     | -        | -      | bioID                         |

|                           |                   |      |            |                               |
|---------------------------|-------------------|------|------------|-------------------------------|
| attL2-BioID2-attL3        | pG9m-2            | -    | -          | bioID2                        |
| attL2-linkerBioID-attL3   | pUC54             | -    | -          | (GGGGS) <sub>13</sub> BioID   |
| attL2-linkerBioID2-attL3  | pG9m-2            | -    | -          | (GGGGS) <sub>13</sub> BioID2  |
| attL2-linkerTurboID-attL3 | pUC54             | -    | -          | (GGGGS) <sub>13</sub> TurboID |
| TPLATE-linkerTurboID      | pK7m34Gw          | p35s | TPLATE     | (GGGGS) <sub>13</sub> TurboID |
| BirA-myc                  | pICSL86900        | p35s | BirA-myc   | BirA-myc                      |
| BirA*-myc                 | pICSL86900        | p35s | BirA*-myc  | BioID-myc                     |
| HF-BioID2-HA              | pICSL86900        | p35s | BioID2-HA  | BioID2-HA                     |
| GFP-TurboID-HF            | pICSL86922        | p35s | TurboID-HF | TurboID                       |
| GFP-TurboID-His           | Xpre2-S (pCAMBIA) | P35S | GFP        | TurboID                       |
| NFR5-TurboID              | Xpre2-S (pCAMBIA) | P35S | NFR5       | TurboID                       |

490

491 **Supplemental Table 2: list of primers used**

| Name                              | Primer                                                                                   |
|-----------------------------------|------------------------------------------------------------------------------------------|
| BirA                              | GTGGTCTC A T TCG GGA AAC GCGGCT ATT AGA TCA AAG GAT<br>AAC ACC GTG CCA CTT A             |
| BirA                              | GTGGTCTC A AAGC CTA CAG ATC CTC TTC TGA GAT GAG TTT TTG<br>TTC TTT TTC TGC ACT ACG AAG G |
| BirA                              | GTGGTCTC A CGTAGAGGTCGTAAATGGTTTTTC                                                      |
| BirA                              | GTGGTCTC C TACGTCCACGACCAGCCTGCT                                                         |
| HF-Module-Fw                      | GTGGTCTC ACCATGGGTTCCGGAAGAGGATCGCA                                                      |
| HF-Module-Rv                      | GTGGTCTC ACATTCCTTGTGCATCGTCATCCTTG                                                      |
| BioID2 with long-linker-Module-Fw | agGAAGACaaTTCGGGATCTGGAGGTGGCGGAAG                                                       |
| BioID2 without linker-Module-Fw   | agGAAGACaaTTCGTTTAAGAACTTGATATGGCTGAAAG                                                  |
| ScFv-superfolder-GFP-Module-Fw    | GTGGTCTC A ATGG GCCCCGACATCGT                                                            |
| ScFv-superfolder-GFP-Module-Fw    | GTGGTCTC A CGAA CCACCTTTGTAGAGCTC                                                        |

492

493 **MATERIAL AND METHODS**

494 ***Bacterial strains***

495 For cloning, *Escherichia coli* strain DH10B or Top10 was used using standard chemical  
 496 transformation protocols. Electrocompetent *Agrobacterium tumefaciens* C58C1 Rif<sup>R</sup> (pMP90),  
 497 AGL1 Rif<sup>R</sup> or GV3101 Rif<sup>R</sup> bacterial cells (i.e. a cured nopaline strain commonly used for  
 498 tobacco infiltration [34] were used for electroporation and tobacco infiltration.  
 499 Electrocompetent rhizogenic *Agrobacterium* (RAB) ATCC15834 (ATCC® 15834™)[35]  
 500 bacterial cells were used for electroporation and for hairy root transformation.



501 Electrocompetent *Agrobacterium tumefaciens* C58C1 Rif<sup>R</sup> (pMP90) or GV3101 Rif<sup>R</sup> bacterial  
502 cells (i.e. a cured nopaline strain commonly used for tobacco infiltration [34]) were used for  
503 *Arabidopsis* cell culture transformation. For cloning, *Escherichia coli* strain DH10B was used  
504 using standard chemical transformation protocols. Electrocompetent *Agrobacterium*  
505 *tumefaciens* C58C1 Rif<sup>R</sup> (pMP90) or GV3101 Rif<sup>R</sup> bacterial cells (i.e. a cured nopaline strain  
506 commonly used for tobacco infiltration [34]) were used for *Arabidopsis* cell culture  
507 transformation.

508

### 509 ***Cloning of the proximity label-tagged control constructs***

510 For constructs used in hairy roots: Constructs encoding the full-length ORF of the PBL (e.g.  
511 BirA\* (pDEST-pcDNA5-BirA\*-Flag C-term, a kind gift from the Gingras laboratory  
512 (Couzens, Knight et al. 2013)), BioID2 (MCS-BioID2-HA, Addgene, Plasmid #74224 (Kim,  
513 Jensen et al. 2016)), TurboID (V5-TurboID-NES\_pCDNA3, Addgene, Plasmid #107169  
514 (Branon, Bosch et al. 2018)), miniTurboID (V5-miniTurbo-NES\_pCDNA3, Addgene, Plasmid  
515 #107170 [9] and Apex2 (linear DNA sequence synthesis) were PCR amplified using Q5®  
516 High-Fidelity DNA Polymerase (New England Biolabs, Cat n° M0491) with oligonucleotide  
517 primers containing attB recombination sequences. The forward and reverse primer additionally  
518 encoded the GGGGS linker and the Flag-tag (DYKDDDDK) followed by a stop codon,  
519 respectively. The primer sequences are depicted in **Table S2**. The resultant attB-flanked PCR  
520 products were used in a Gateway® BP recombination reaction with the pDONR™ P2r-P3  
521 vector (Life Technologies, Carlsbad, CA, USA) according to the manufacturer's instructions,  
522 thereby creating an entry clone. The construct was transformed in DH5α chemical competent  
523 cells and verified by sequencing (i.e. Sanger sequencing). Using a standard multisite (3-  
524 fragment) Gateway® LR cloning strategy as described by [36], the entry clones together with  
525 pEN-L1-F-L2 encoding eGFP [37] (<https://gateway.psb.ugent.be/search>) and pEN-L4-2-R1  
526 encoding the constitutive cauliflower mosaic virus (CaMV) 35S promoter [37], were  
527 recombined with the multisite Gateway destination vector pKm43GW [37] to generate  
528 expression constructs. More specifically, the multisite LR Gateway reaction resulted in  
529 translational fusions between the eGFP and the proximity labels, driven by the 35S promoter.  
530 This way, the following expression constructs were created; Pro35S::eGFP-BirA\*,  
531 Pro35S::eGFP-BioID2, Pro35S::eGFP-TurboID and Pro35S::eGFP-miniTurboID and  
532 Pro35S::eGFP-BirA\*(Deep) construct (in pKm43GW), with a C-terminally triple HA-tagged  
533 BirA\* fused to eGFP.

534 For constructs used in *N. benthamiana*: original BioID, BioID2 and TurboID DNA  
535 sequences were taken from [5, 9, 10], codon optimized to *Arabidopsis*. The GOLDENGATE  
536 compatible BirA, BirA\*, BioID2 and TurboID were synthesized and codon optimized using  
537 the codon optimization tool of Integrated DNA Technologies, Inc. The ORFs were synthesized  
538 with BsaI overhangs and were ligated to the Level1/2 vector pICSL86900 and pICSL86922,  
539 as previously described [38]. The following expression vectors were used: Pro35S::BirA-Myc,  
540 Pro35S::BirA\*-myc, Pro35S::HF-BioID2-HA and Pro35S::superfolderGFP-TurboID-FLAG.

541 The genomic sequence of NFR5 and the coding sequence of BRI1 was synthesized with  
542 BsaI overhangs for Golden Gate as Level1 vector [39]. Pro35S::NFR5-TurboID and  
543 Pro35S::BRI1-GFP were created by Golden Gate cloning in Xpre2-S (pCAMBIA) vectors  
544 (Binder et al 2014). Pro35S::FLS2-GFP was kindly provided by Hemsley lab, University of  
545 Dundee, Scotland. Pro35S::EFR-GFP [40] and Pro35S::SymRK-GFP/ Pro35S::NFR5-GFP  
546 [41, 42] were kindly provided by Cyril Zipfel (University of Zurich, Switzerland) and Jens  
547 Stougaard (Aarhus University, Denmark).

548

549 For constructs used in *A. thaliana*: BioID and BioID2 DNA sequences were taken from [5, 10],  
550 codon optimized to *Arabidopsis* using the codon optimization tool of Integrated DNA  
551 Technologies, Inc. The BioID and BioID2 with and without linker (GGGGS)<sub>13</sub> with stop codon,  
552 flanked by attB2 and attB3 sites [43] were synthesized by Gen9. The TurboID sequence (Tess  
553 et al., 2018) was codon optimized to *Arabidopsis* using the codon optimization tool of  
554 Integrated DNA Technologies, Inc. TurboID with linker (GGGGS)<sub>13</sub> with stop codons, flanked  
555 by attB2 and attB3 sites [43], was synthesized by GenScript. Entry clones of eGFP [44], TML  
556 (At5g57460) [27] and TPLATE (At3g01780) [45] without stop codon were used in a triple  
557 Gateway LR reaction, combining pK7m34GW or pH7m34GW [43], pDONRP4-P1R-35sp and  
558 pDONRP2-P3R-BioID/BioID2/(GGGGS)<sub>13</sub> BioID/(GGGGS)<sub>13</sub> BioID2/(GGGGS)<sub>13</sub> TurboID  
559 to yield pK7m34GW,35sp: GFP/TPLATE/TML-BioID, pK7m34GW,35sp: GFP/ TML-  
560 BioID2, pH7m34GW,35sp: TPLATE-BioID2, pK7m34GW 35sp: TML-(GGGGS)<sub>13</sub>  
561 BioID/BioID2, pK7m34GW 35sp: TPLATE-(GGGGS)<sub>13</sub> BioID/BioID2 and pK7m34GW  
562 35sp: GFP/TPLATE-(GGGGS)<sub>13</sub> TurboID.

563

#### 564 ***Plant transformations***

565 Hairy roots: Seeds of tomato (*Solanum* spp.) cv. Moneymaker were surface-sterilized in 70%  
566 ethanol for 10 min and in 3% NaOCl for 20 min (rinsing with sterile deionized water was  
567 performed in between the two sterilization steps), and then rinsed 3 times 5 min each with

568 sterile deionized water. The seeds were germinated on Murashige and Skoog (MS) tissue  
569 culture medium [46] containing 4.3 g/L MS medium (Duchefa; catalog no. M0221.0050), 0.5  
570 g/L MES, 20 g/L sucrose, pH 5.8, and 8 g/L agar (Difco; catalog no. 214530) in magenta boxes  
571 (~50 ml). The pH of the medium was adjusted to 5.8 with KOH and autoclaved at 121°C for  
572 20 min. The boxes were covered and placed in the dark at 4°C in a cold room for two days.  
573 Subsequently, the boxes were transferred to a 24°C growth chamber (16 h light/8 h  
574 photoperiod) for ~10 days until cotyledons were fully expanded and the true leaves just  
575 emerged. Rhizogenic *Agrobacterium* (RAB) transformation was essentially performed as  
576 described previously [47] with some minor modifications. More specifically, competent  
577 rhizogenic *Agrobacterium* cells were transformed by electroporation (Shen and Forde 1989)  
578 with the desired binary vector, plated on YEB medium plates with the appropriate antibiotics  
579 (100 mg/L spectinomycin), and incubated for 3 to 4 d at 28°C. A transformed rhizogenic  
580 *Agrobacterium* culture was inoculated from fresh plates into YEB liquid medium with the  
581 appropriate antibiotics added and grown overnight at 28°C with shaking at 200 rpm. The RAB  
582 culture was used to transform 20 to 40 tomato cotyledon halves. Using a scalpel, the cotyledons  
583 were cut in half from ~10 days old tomato seedlings, transferred (adaxial side down) onto MS  
584 liquid medium. The MS liquid was subsequently removed and the cotyledon halves  
585 immediately immersed in a bacterial suspension at an optical density at 600 nm of 0.3 in MS  
586 liquid medium for 20 min, then blotted on sterile Whatman filter paper and transferred (adaxial  
587 side down) onto MS agar plates without antibiotics (4.3 g/L MS medium, 0.5 g/L MES, 30 g/L  
588 sucrose, pH 5.8, and 8 g/L agar). The co-cultivation culture plates were closed with aeropore  
589 tape. After 3 to 4 days of incubation at 22-25°C in the dark (Oberpichler, Rosen et al. 2008),  
590 the cotyledons were transferred to MS agar plates with 200 mg/L cefotaxime (Duchefa;  
591 catalogue no. c0111.0025) and 50 mg/L kanamycin and returned to 22-25°C. Typically, three  
592 to five independent roots arise from each cotyledon. The expression of the eGFP marker of  
593 antibiotic-resistant roots that emerged was monitored by means of fluorescent microscopic  
594 imaging (Leica stereomicroscope and imaging DFC7000 T Leica microscope camera) and four  
595 to ten independent roots showing expression of the marker were subcloned for each construct.  
596 These roots were subsequently transferred to new selection plates with the same antibiotic  
597 concentration for 3 rounds of subcultivation (~6 weeks) before antibiotics-free cultivation of  
598 the hairy root cultures in liquid MS (in 50 ml Falcon tubes containing 10 to 30 ml MS medium  
599 at 22-25°C and shaking at 300 rpm) and downstream analysis. After 3 rounds of cultivation,  
600 root cultures were maintained and grown in antibiotics-free half-strength (½) Murashige and  
601 Skoog (MS) medium supplemented with 3% sucrose at 22-25°C.

602 *N. benthamiana*: Wild-type tobacco (*Nicotiana benthamiana*) plants were grown under normal  
603 light and dark regime at 25°C and 70% relative humidity. 3- to 4-weeks old *N. benthamiana*  
604 plants were watered from the bottom ~2h prior infiltration. Transformed *Agrobacterium*  
605 *tumefaciens* strain C58C1 Rif<sup>R</sup> (pMP90), AGL1 Rif<sup>R</sup> or GV3101 Rif<sup>R</sup> harbouring the  
606 constructs of interest were used to infiltrate tobacco leaves and used for transient expression of  
607 binary constructs by *Agrobacterium tumefaciens*-mediated transient transformation of lower  
608 epidermal leaf cells essentially as described previously [48]. Transformed *Agrobacterium*  
609 *tumefaciens* were grown for ~20h in a shaking incubator (200 rpm) at 28°C in 5 mL of LB-  
610 medium (Luria/Miller) (Carl Roth) or yeast extract broth (YEB) medium (5 g/L beef extract, 1  
611 g/L yeast extract, 5 g/L peptone, 0.5 g/L MgCl<sub>2</sub>, and 15 g/L bacterial agar), supplemented with  
612 appropriate antibiotics (i.e. 100 g/L spectinomycin). After incubation, the bacterial culture was  
613 transferred to 15 ml Falcon tubes and centrifuged (10 min, 5,000 rpm). The pellets were washed  
614 with 5 mL of the infiltration buffer (10 mM MgCl<sub>2</sub>, 10 mM MES pH 5.7) and the final pellet  
615 resuspended in the infiltration buffer supplemented with 100-150 µM acetosyringone. The  
616 bacterial suspension was diluted with supplemented infiltration buffer to adjust the inoculum  
617 concentration to a final OD<sub>600</sub> value of 0.025-1.0. The inoculum was incubated for 2-3 h at  
618 room temperature before injecting and delivered to tobacco by gentle pressure infiltration of  
619 the lower epidermis leaves (fourth and older true leaves were used; and about 4/5-1/1 of their  
620 full size) with a 1-mL hypodermic syringe without needle [49].

621 Arabidopsis cell suspension: The PSB-D Arabidopsis thaliana cell suspension cultures were  
622 transformed with the POI: 35sp::GFP/TPLATE/TML-BioID/BioID2, 35sp::TPLATE/TML-  
623 (GGGGS)<sub>13</sub> BioID/BioID2 and 35sp:: GFP/TPLATE-(GGGGS)<sub>13</sub> TurboID and selected  
624 without callus screening, grown and subcultured as described by [36].

### 625 ***Biotin treatments***

626 *Hairy roots*: For assessing self-biotinylation, 2 weeks old 25 ml liquid cultures were added 5  
627 ml fresh MS medium with or w/o supplemented biotin (i.e. 50 µM f.c.; stock solution dissolved  
628 in water) for 2h or 24h and samples collected. Two independent root cultures were analyzed  
629 per combination and the experiment repeated twice with similar results.

630 *N. benthamiana* leaves: Plants were kept under normal growing conditions 22°C, re-infiltrated  
631 with infiltration buffer (no biotin) or alternatively, infiltration buffer supplemented with biotin  
632 (stock solution dissolved in DMSO or water) and samples collected at the indicated times  
633 points. Two infiltrated tobacco leaf segments/leaves were analyzed per combination.

634 *Arabidopsis* cell cultures: were grown under normal conditions, at 25°C at 130 rpm in the dark.  
635 48 h after subculturing, the required amount of biotin was added and the cell culture was  
636 transferred to the desired temperature for 24 h at 130 rpm in the dark in an INCLU-line IL56  
637 (VWR) incubator. After 24 h, cell cultures were harvested and flash frozen in liquid nitrogen  
638 and stored at -70° till used.

639

#### 640 ***Protein extractions***

641 Hairy roots: The tissue samples were flash frozen and crushed using a liquid cooled mortar and  
642 pestle and the crushed material transferred to a 1.5 ml Eppendorf in homogenization buffer (25  
643 mM Tris-HCl pH 7.6, 15 mM MgCl<sub>2</sub>, 5 mM EGTA, 150 mM NaCl, 15mM pNO<sub>2</sub>PhenylPO<sub>4</sub>,  
644 15 mM β-glycerolphosphate, 1mM DTT, 0.1% NP-40, 0.1 mM Na<sub>3</sub>VO<sub>4</sub>, 1mM NaF, 1mM  
645 PMSF, 10 µg/ml leupeptin, 10 µg/ml aprotinin, 10 µg/ml SBTI, 0.1 mM benzamidine, 5 µg/ml  
646 antipain, 5 µg/ml pepstatin, 5 µg/ml chymostatin, 1µM E64, 5% ethylene glycol) was added  
647 with volumes according to the dry weight of the recovered material (1/1 w/v) and protein  
648 material extracted by three repetitive freeze-thaw cycles in liquid nitrogen and the lysate  
649 transferred to a 1.5 ml Eppendorf. The lysates were cleared by centrifugation for 15 min at  
650 16,100 x g (4 °C) and the supernatant transferred to a new 1.5 ml Eppendorf. This step was  
651 repeated two times and the protein concentration was determined by the DC Protein Assay Kit  
652 (Bio-Rad, Munich, Germany) according to the manufacturer's instructions.

653 *N. benthamiana* leaves: The tissue samples were crushed using a liquid cooled mortar and  
654 pestle and the crushed material transferred to a 1.5 ml Eppendorf in homogenization buffer.  
655 Leaves were harvested and directly frozen in liquid nitrogen. Proteins were extracted with  
656 buffer containing 50 mM Tris-HCl (pH 7.5), 150 mM NaCl, 10 % glycerol, 2 mM EDTA, 5  
657 mM DTT, 1 mM PMSF, Protease inhibitor Cocktail (Roche) and 1 % (v/v) IGEPAL CA-630  
658 (Sigma-Aldrich). Extraction buffer was added at 2 ml/g tissue. Extracts were incubated at 4 °C  
659 for 1 h and then centrifuged at 4 °C, 13000 rpm for 30min. Supernatants were used directly or  
660 filtered through PD-10 columns (GE Healthcare) and incubated with streptavidin (Roche) or  
661 GFP (Chromotek) beads for 1 h. For ammonium acetate protein precipitation, supernatants  
662 were precipitated using 5x v/v pre-cold 0.1 M ammonium acetate in methanol at -20 °C for 2h  
663 and then centrifuged at 4 °C, 13,000 rpm for 15min. The pellet was washed with pre-cold 0.1  
664 M ammonium acetate and dissolved in the same extraction buffer plus 1% SDS. Magnetic  
665 separation was done using Dynabeads™ M-280 Streptavidin (Thermo Fisher Scientific)  
666 followed by 5 times washing in buffer containing 50 mM Tris-HCl (pH 7.5), 150 mM NaCl,

667 10 % glycerol, 2 mM EDTA, Protease inhibitor Cocktail (Roche) and 0.5 % (v/v) IGEPAL  
668 CA-630 (Sigma-Aldrich) and one time in buffer containing 50 mM Tris-HCl (pH 7.5), 1M  
669 NaCl, 10 % glycerol, 2 mM EDTA, Protease inhibitor Cocktail (Roche) and 0.5 % (v/v)  
670 IGEPAL CA-630 (Sigma-Aldrich) at 4°C. To release the proteins, 100 µl 2x NuPAGE LDS  
671 sample buffer (Invitrogen) was added and samples were heated for 5 min at 95 °C

672 *Arabidopsis cell cultures*: Total protein extracts were obtained from liquid nitrogen retched (20  
673 Hz, 1 min), biotin treated and harvested, *Arabidopsis* cell suspension cultures using double the  
674 volume (w/2v) of extraction buffer containing 150mM Tris-HCl pH 7.5; 150 mM NaCl; 10 %  
675 glycerol; 10 mM EDTA; 1mM sodium molybdate; 1 mM NaF and freshly added 10 mM DTT;  
676 1 % (v/v) protease inhibitor cocktail (P9599, Sigma (1 tablet/10ml elution buffer) and 1 % (v/v)  
677 NP-40. Cell debris was removed by two rounds of centrifugation at 14,000 rpm for 20 min at  
678 4°C and the supernatant was collected.

#### 679 ***SDS-PAGE and western blots***

680 *Hairy roots*: Sample loading buffer was added and equivalent amounts of protein (~ 30 µg)  
681 separated by SDS-PAGE (1.0 mm thick 4 to 12% polyacrylamide Criterion Bis-Tris XT- gels,  
682 Bio-Rad or equivalent) in MOPS buffer (Bio-Rad) at 150 V. Subsequently, proteins were  
683 transferred onto PVDF membranes with 0.2 µm porous size. Membranes were blocked for 30  
684 min in a 1:1 Tris-buffered saline (TBS)/Odyssey Blocking solution (cat n° 927-40003, LI-  
685 COR, Lincoln, NE, USA) and probed by Western blotting. Following overnight incubation of  
686 primary antibody in TBS-T/Odyssey blocking buffer and three 10 min washes in TBS-T (0.1%  
687 Tween-20), membranes were incubated with secondary antibody for 30 min in TBS-T/Odyssey  
688 blocking buffer followed by 3 washes in TBS-T or TBS (last wash step). The following  
689 antibodies were used: streptavidin-S680 (Invitrogen, S32358, 1/10000), mouse anti-Flag  
690 (Sigma, F3165; 1/5000), mouse anti-actin (plant) (Sigma, A0480, 1/2000), rabbit anti-GFP  
691 (Invitrogen, A11122, 1/1000), anti-mouse (IRDye 800 CW goat anti-mouse antibody IgG, LI-  
692 COR, cat n° 926-32210, 1/10000) and anti-rabbit (IRDye 800 CW goat anti-rabbit IgG, LI-  
693 COR, cat n° 926-3221, 1/10000). The bands were visualized using an Odyssey infrared  
694 imaging system (LI-COR) and the intensity of bands assessed using the LICOR Odyssey  
695 software for Western Blot image processing.

696 *N. benthamiana*: Extracted proteins were loaded to 12% SDS-PAGE gels and separated for 2  
697 h at 90-110V. SDS-PAGE gels were blotted via wet transfer on PVDF membranes (Carl Roth)  
698 overnight at 30V. Membrane blocking was performed with 3%BSA in PBS-t buffer for 1 h at

699 room temperature followed by incubation with Mouse-anti-GFP (TaKaRa) (1/5,000) for 2 h  
700 followed by Anti-Mouse-HRP (Sigma-Aldrich) (1/5,000) for 2 h or directly Strep-Tactin-HRP  
701 (iba-Life Sciences) (1/5,000) for 2 h. Chemiluminescence was detected with Clarity Western  
702 ECL (Bio-rad).

703 *N. benthamiana*: Input and eluted proteins were loaded to 12% SDS-PAGE gels and separated  
704 for 1-2 h at 120 V. SDS-PAGE gels were blotted via wet transfer on PVDF membranes (Bio-  
705 rad) 3h at 300 mA in a cool room. The membrane was blocked with 3% BSA in PBS-T buffer  
706 for 1 h at room temperature followed by incubation with Streptavidin-HRP (Sigma-Aldrich)  
707 (1/25,000) for 2 h. Chemiluminescence was detected with ECL Prime Western Blotting  
708 Detection Reagent (GE healthcare).

709 *Arabidopsis cell cultures*: The extracts were heated in sample buffer for 10 min at 70°C and  
710 loaded in equal amounts (20 µg) on a 4-20% SDS-PAGE gel. SDS-PAGE separated proteins  
711 were blotted on PVDF membrane (Thermo Fischer). Membranes were blocked overnight at  
712 RT in 5% (v/v) BSA dissolved in 25 mM Tris-HCl, pH8, 150 mM NaCl and 0.1% Tween20.  
713 The blots were then incubated at room temperature with the Pierce High Sensitivity  
714 Streptavidin-HRP Thermo Fisher scientific (1/2,000) or Abcam Anti-HA-HRP tag antibody  
715 (ab1190) (1/5,000) for 2 h. Antigen-antibody complexes were detected using  
716 chemiluminescence (Perkin-Elmer).

717

### 718 ***Protein Extraction and Pull-Down for mass spectrometry analysis***

719 *Arabidopsis cell cultures* expressing different POI were ground in 0.67 volume of extraction  
720 buffer containing 100mM Tris (pH7.5), 2% SDS and 8M Urea. The extract was mechanically  
721 disrupted using three repetitive freeze-thaw cycles followed by 2 cycles of sonication at output  
722 level 4 with a 40% duty cycle for 50 secs. Cell debris was removed by two rounds of  
723 centrifugation at 20,000 rpm for 20 min and the supernatant was buffer exchanged using pre-  
724 equilibrated PD-10 columns and eluted in binding buffer containing 100mM Tris (pH7.5), 2%  
725 SDS and 7.5M Urea. Pull-downs were performed in triplicate. For each pull-down, 1/3 of the  
726 soluble protein extract was incubated with 200 µl slurry of streptavidin sepharose high-  
727 performance beads (Amersham) overnight on a rotating wheel at RT. The unbound fraction  
728 was removed after brief centrifugation at 1,500 rpm for 1 min. Beads were transferred to a  
729 Mobicol column and washed with 4 ml binding buffer incubating for 5 min, followed by a wash  
730 with high salt buffer containing 1M NaCl, 100 mM Tris-HCl pH 7.5 and incubated for 30 min.  
731 The beads were washed once with ultrapure water, incubated for five min, and finally washed

732 with 3.2ml of 50mM ammonium bicarbonate pH8.0. Proteins were digested on beads with  
733 Trypsin/LysC (Promega) overnight followed by zip-tip cleanup using C-18 Omix tips  
734 (Agilent). Digests containing the unbiotinylated peptides were dried in a Speedvac and stored  
735 at -20 °C until LC-MS/MS analyses. Biotinylated peptides were eluted first by adding 300µl  
736 of the elution buffer (0.2% TFA, 0.1% formic acid and 80% acetonitrile in water) [29] and  
737 collecting the eluted proteins by centrifuging at 1500 rpm for 1 min and a second elution by  
738 adding 300µl of the elution buffer and heating at 95°C for 5 min for maximum release of  
739 peptides. A short spin at 1500 rpm for 1 min was done to collect the eluted peptides. The two  
740 elutes were pooled together and dried in a Speedvac. The dried peptides were dissolved in 1%  
741 TFA solution to perform zip-tip cleanup using C-18 Omix tips (Agilent). Digests were dried in  
742 a Speedvac as Elution-2 and stored at -20 °C until LC-MS/MS analysis.

743

#### 744 ***Mass Spectrometry and Data Analysis***

745 Pull-down experiments were analyzed on a Q Exactive (ThermoFisher Scientific) as previously  
746 reported [50]. Proteins were identified with MaxQuant using standard parameters. The relative  
747 abundance of the TPC subunits in pull-down and BioID experiments was determined by  
748 average LFQ intensities of the TPC subunits per set of three experiments, normalized versus  
749 the bait, TPLATE or TML, and taking into account the MW of the TPC subunit. LFQ values  
750 in case of non-detection were imputed using the Perseus software package. For each of the TPC  
751 subunits, the identified peptides were mapped to the protein sequence. Non-biotinylated and  
752 biotinylated peptides of TPC subunits were mapped to the protein sequence by using the Draw  
753 Map tool in the MSTools package (<http://peterslab.org/MSTools/> [51]) and put together using  
754 Inkscape v 0.92.4 ([www.inkscape.org](http://www.inkscape.org)). Domain annotation of TPC subunits was retrieved  
755 using InterPro protein sequence analysis (<https://www.ebi.ac.uk/interpro/>) [52].

756

#### 757 **REFERENCES**

- 758 1. Varnaite, R. and S.A. MacNeill, *Meet the neighbors: Mapping local protein interactomes by*  
759 *proximity-dependent labeling with BioID*. *Proteomics*, 2016. **16**(19): p. 2503-2518.
- 760 2. van Steensel, B. and S. Henikoff, *Identification of in vivo DNA targets of chromatin proteins*  
761 *using tethered dam methyltransferase*. *Nat Biotechnol*, 2000. **18**(4): p. 424-8.
- 762 3. Kim, D.I. and K.J. Roux, *Filling the Void: Proximity-Based Labeling of Proteins in Living Cells*.  
763 *Trends Cell Biol*, 2016. **26**(11): p. 804-817.
- 764 4. Choi-Rhee, E., H. Schulman, and J.E. Cronan, *Promiscuous protein biotinylation by Escherichia*  
765 *coli biotin protein ligase*. *Protein Sci*, 2004. **13**(11): p. 3043-50.
- 766 5. Roux, K.J., et al., *A promiscuous biotin ligase fusion protein identifies proximal and*  
767 *interacting proteins in mammalian cells*. *J Cell Biol*, 2012. **196**(6): p. 801-10.



- 768 6. Kwon, K. and D. Beckett, *Function of a conserved sequence motif in biotin holoenzyme*  
769 *synthetases*. Protein Sci, 2000. **9**(8): p. 1530-9.
- 770 7. Cronan, J.E., *Targeted and proximity-dependent promiscuous protein biotinylation by a*  
771 *mutant Escherichia coli biotin protein ligase*. J Nutr Biochem, 2005. **16**(7): p. 416-8.
- 772 8. Kim, D.I., et al., *An improved smaller biotin ligase for BioID proximity labeling*. Mol Biol Cell,  
773 2016. **27**(8): p. 1188-96.
- 774 9. Branon, T.C., et al., *Efficient proximity labeling in living cells and organisms with TurboID*. Nat  
775 Biotechnol, 2018. **36**(9): p. 880-887.
- 776 10. Kim, D.I., et al., *Probing nuclear pore complex architecture with proximity-dependent*  
777 *biotinylation*. Proc Natl Acad Sci U S A, 2014. **111**(24): p. E2453-61.
- 778 11. Opitz, N., et al., *Capturing the Asc1p/Receptor for Activated C Kinase 1 (RACK1)*  
779 *Microenvironment at the Head Region of the 40S Ribosome with Quantitative BioID in Yeast*.  
780 Mol Cell Proteomics, 2017. **16**(12): p. 2199-2218.
- 781 12. Opitz, N., et al., *Capturing the Asc1p/Receptor for Activated C Kinase 1 (RACK1)*  
782 *Microenvironment at the Head Region of the 40S Ribosome with Quantitative BioID in Yeast*.  
783 Molecular & Cellular Proteomics, 2017. **16**(12): p. 2199-2218.
- 784 13. Batsios, P., I. Meyer, and R. Graf, *Proximity-Dependent Biotin Identification (BioID) in*  
785 *Dictyostelium Amoebae*. Methods Enzymol, 2016. **569**: p. 23-42.
- 786 14. Gu, B., et al., *AIRE is a critical spindle-associated protein in embryonic stem cells*. Elife, 2017.  
787 **6**.
- 788 15. Dingar, D., et al., *BioID identifies novel c-MYC interacting partners in cultured cells and*  
789 *xenograft tumors*. J Proteomics, 2015. **118**: p. 95-111.
- 790 16. Gupta, G.D., et al., *A Dynamic Protein Interaction Landscape of the Human Centrosome-*  
791 *Cilium Interface*. Cell, 2015. **163**(6): p. 1484-99.
- 792 17. Youn, J.Y., et al., *High-Density Proximity Mapping Reveals the Subcellular Organization of*  
793 *mRNA-Associated Granules and Bodies*. Mol Cell, 2018. **69**(3): p. 517-532.e11.
- 794 18. Lin, Q., et al., *Screening of Proximal and Interacting Proteins in Rice Protoplasts by Proximity-*  
795 *Dependent Biotinylation*. Front Plant Sci, 2017. **8**: p. 749.
- 796 19. Conlan, B., et al., *Development of a Rapid in planta BioID System as a Probe for Plasma*  
797 *Membrane-Associated Immunity Proteins*. Frontiers in plant science, 2018. **9**: p. 1882-1882.
- 798 20. Khan, M., et al., *In planta proximity dependent biotin identification (BioID)*. Scientific Reports,  
799 2018. **8**(1): p. 9212.
- 800 21. Das, P.P., et al., *In planta proximity-dependent biotin identification (BioID) identifies a TMV*  
801 *replication co-chaperone NbSGT1 in the vicinity of 126 kDa replicase*. Journal of Proteomics,  
802 2019. **204**: p. 103402.
- 803 22. Alban, C., D. Job, and R. Douce, *BIOTIN METABOLISM IN PLANTS*. Annu Rev Plant Physiol  
804 Plant Mol Biol, 2000. **51**: p. 17-47.
- 805 23. Pirner, H.M. and J. Stolz, *Biotin sensing in Saccharomyces cerevisiae is mediated by a*  
806 *conserved DNA element and requires the activity of biotin-protein ligase*. Journal of Biological  
807 Chemistry, 2006. **281**(18): p. 12381-12389.
- 808 24. Ried, M.K., M. Antolin-Llovera, and M. Parniske, *Spontaneous symbiotic reprogramming of*  
809 *plant roots triggered by receptor-like kinases*. Elife, 2014. **3**.
- 810 25. Antolin-Llovera, M., M.K. Ried, and M. Parniske, *Cleavage of the SYMBIOSIS RECEPTOR-LIKE*  
811 *KINASE ectodomain promotes complex formation with Nod factor receptor 5*. Curr Biol, 2014.  
812 **24**(4): p. 422-7.
- 813 26. Grebe, M., et al., *Arabidopsis sterol endocytosis involves actin-mediated trafficking via ARA6-*  
814 *positive early endosomes*. Curr Biol, 2003. **13**(16): p. 1378-87.
- 815 27. Gadeyne, A., et al., *The TPLATE adaptor complex drives clathrin-mediated endocytosis in*  
816 *plants*. Cell, 2014. **156**(4): p. 691-704.

- 817 28. Cox, J., et al., *Accurate proteome-wide label-free quantification by delayed normalization*  
818 *and maximal peptide ratio extraction, termed MaxLFQ*. Mol Cell Proteomics, 2014. **13**(9): p.  
819 2513-26.
- 820 29. Schiapparelli, L.M., et al., *Direct detection of biotinylated proteins by mass spectrometry*. J  
821 Proteome Res, 2014. **13**(9): p. 3966-78.
- 822 30. Deal, R.B. and S. Henikoff, *The INTACT method for cell type-specific gene expression and*  
823 *chromatin profiling in Arabidopsis thaliana*. Nat Protoc, 2011. **6**(1): p. 56-68.
- 824 31. Beckett, D., E. Kovaleva, and P.J. Schatz, *A minimal peptide substrate in biotin holoenzyme*  
825 *synthetase-catalyzed biotinylation*. Protein Sci, 1999. **8**(4): p. 921-9.
- 826 32. Mair, A., et al., *Proximity labeling of protein complexes and cell type-specific organellar*  
827 *proteomes in Arabidopsis enabled by TurboID*. BioRxiv 2019: p. 629675.
- 828 33. Kim, T.-W., et al., *Application of TurboID-mediated proximity labeling for mapping a GSK3*  
829 *kinase signaling network in Arabidopsis*. BioRxiv 2019: p. 636324.
- 830 34. Ashby, A.M., et al., *Ti plasmid-specified chemotaxis of Agrobacterium tumefaciens C58C1*  
831 *toward vir-inducing phenolic compounds and soluble factors from monocotyledonous and*  
832 *dicotyledonous plants*. J Bacteriol, 1988. **170**(9): p. 4181-7.
- 833 35. Kajala, K., D.A. Coil, and S.M. Brady, *Draft Genome Sequence of Rhizobium rhizogenes Strain*  
834 *ATCC 15834*. Genome Announc, 2014. **2**(5).
- 835 36. Van Leene, J., et al., *A tandem affinity purification-based technology platform to study the*  
836 *cell cycle interactome in Arabidopsis thaliana*. Mol Cell Proteomics, 2007. **6**(7): p. 1226-38.
- 837 37. Karimi, M., et al., *Building Blocks for Plant Gene Assembly*. 2007. **145**(4): p. 1183-1191.
- 838 38. Patron, N.J., et al., *Standards for plant synthetic biology: a common syntax for exchange of*  
839 *DNA parts*. New Phytol, 2015. **208**(1): p. 13-9.
- 840 39. Binder, A., et al., *A Modular Plasmid Assembly Kit for Multigene Expression, Gene Silencing*  
841 *and Silencing Rescue in Plants*. PLOS ONE, 2014. **9**(2): p. e88218.
- 842 40. Schwessinger, B., et al., *Phosphorylation-Dependent Differential Regulation of Plant Growth,*  
843 *Cell Death, and Innate Immunity by the Regulatory Receptor-Like Kinase BAK1*. PLOS  
844 Genetics, 2011. **7**(4): p. e1002046.
- 845 41. Madsen, E.B., et al., *Autophosphorylation is essential for the in vivo function of the Lotus*  
846 *japonicus Nod factor receptor 1 and receptor-mediated signalling in cooperation with Nod*  
847 *factor receptor 5*. Plant J, 2011. **65**(3): p. 404-17.
- 848 42. Wong, J., et al., *A Lotus japonicus cytoplasmic kinase connects Nod factor perception by the*  
849 *NFR5 LysM receptor to nodulation*. Proc Natl Acad Sci U S A, 2019.
- 850 43. Karimi, M., B. De Meyer, and P. Hilson, *Modular cloning in plant cells*. Trends Plant Sci, 2005.  
851 **10**(3): p. 103-5.
- 852 44. Mylle, E., et al., *Emission spectra profiling of fluorescent proteins in living plant cells*. 2013.  
853 **9**(1): p. 10.
- 854 45. Van Damme, D., et al., *Somatic Cytokinesis and Pollen Maturation in Arabidopsis*  
855 *Depend on TPLATE, Which Has Domains Similar to Coat Proteins*. 2006. **18**(12): p. 3502-3518.
- 856 46. Murashige, T. and F. Skoog, *A Revised Medium for Rapid Growth and Bio Assays with*  
857 *Tobacco Tissue Cultures*. Physiologia Plantarum, 1962. **15**(3): p. 473-497.
- 858 47. Harvey, J.J.W., J.E. Lincoln, and D.G. Gilchrist, *Programmed cell death suppression in*  
859 *transformed plant tissue by tomato cDNAs identified from an Agrobacterium rhizogenes-*  
860 *based functional screen*. Molecular Genetics and Genomics, 2008. **279**(5): p. 509-521.
- 861 48. Boruc, J., et al., *Functional modules in the Arabidopsis core cell cycle binary protein-protein*  
862 *interaction network*. Plant Cell, 2010. **22**(4): p. 1264-80.
- 863 49. Moschou, P.N., et al., *Separase Promotes Microtubule Polymerization by Activating CENP-E-*  
864 *Related Kinesin Kin7*. Dev Cell, 2016. **37**(4): p. 350-361.
- 865 50. Nelissen, H., et al., *Dynamic Changes in ANGUSTIFOLIA3 Complex Composition Reveal a*  
866 *Growth Regulatory Mechanism in the Maize Leaf*. Plant Cell, 2015. **27**(6): p. 1605-19.

- 867 51. Kavan, D. and P. Man, *MSTools—Web based application for visualization and presentation of*  
868 *HXMS data*. International Journal of Mass Spectrometry, 2011. **302**(1): p. 53-58.  
869 52. Mitchell, A.L., et al., *InterPro in 2019: improving coverage, classification and access to*  
870 *protein sequence annotations*. Nucleic Acids Research, 2018. **47**(D1): p. D351-D360.  
871  
872
