# Supplementary material for: Establishment of Proximity-dependent Biotinylation Approaches in Different Plant Model Systems
Source: bioRxiv or medRxiv preprint supplement (doi:10.1101/701425), 2020-03-27
Supplement: Supplementary file [file media-1.pdf]

## Establishment of Proximity-dependent Biotinylation Approaches in Different Plant Model Systems.

Deepanksha Arora<sup>1,2,\*</sup>, Nikolaj B. Abel<sup>3,\*</sup>, Chen Liu<sup>4,\*</sup>, Petra Van Damme<sup>1,2,5,\*</sup>, Klaas Yperman<sup>1,2</sup>, Lam Dai Vu<sup>1,2</sup>, Jie Wang<sup>1,2</sup>, Anna Tornkvist<sup>4</sup>, Francis Impens<sup>6,7,8</sup>, Barbara Korbei<sup>9</sup>, Dominique Eeckhout<sup>1,2</sup>, Jelle Van Leene<sup>1,2</sup>, Alain Goossens<sup>1,2</sup>, Geert De Jaeger<sup>1,2,#</sup>, Thomas Ott<sup>3,10,#</sup>, Panagiotis Moschou<sup>4,11,12,#</sup>, Daniël Van Damme<sup>1,2,#</sup>

### Supplemental material

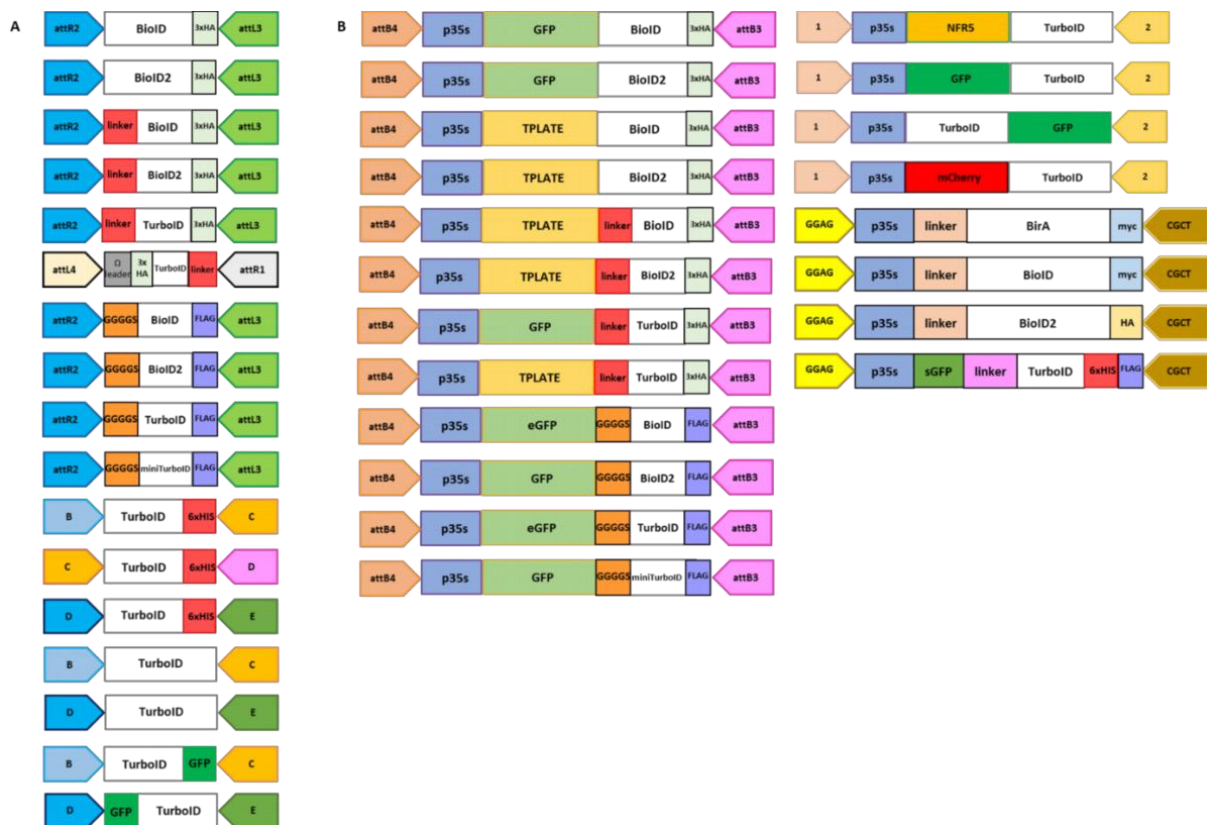

### Supplemental Figure 1. Overview of available constructs for proximity biotinylation in plants.

Diagrammatic representation of plasmids used in the study and/or available for the community. (A) various entry clones or building blocks used to make the destination vectors in panel B. (B) Destination vectors used in this study and/or available to the community. Gateway att sites are according to Karimi et al., 2007. Borders of golden gateway B-E and 1,2 are according to GoldenGate from Binder et al 2014, whereas the 4 nucleotide borders of the golden gateway system are according to GoldenGate from Patron et al., 2015. The linker (in red) is a 65 aa long (GGGGS)<sub>13</sub> repeat. The linker (in light orange) is a 213bp GS linker while the one in grey is 30 bp GS linker. BioID, BioID2, TurboID and miniTurbo all represent promiscuous versions of the respective biotin ligases. BirA is the non-promiscuous negative control version of the biotin ligase. Myc, HA, 6xHis and 1x or 3xFLAG are added tags for Western Blot detection. All corresponding sequences can be found in supplemental sequences.

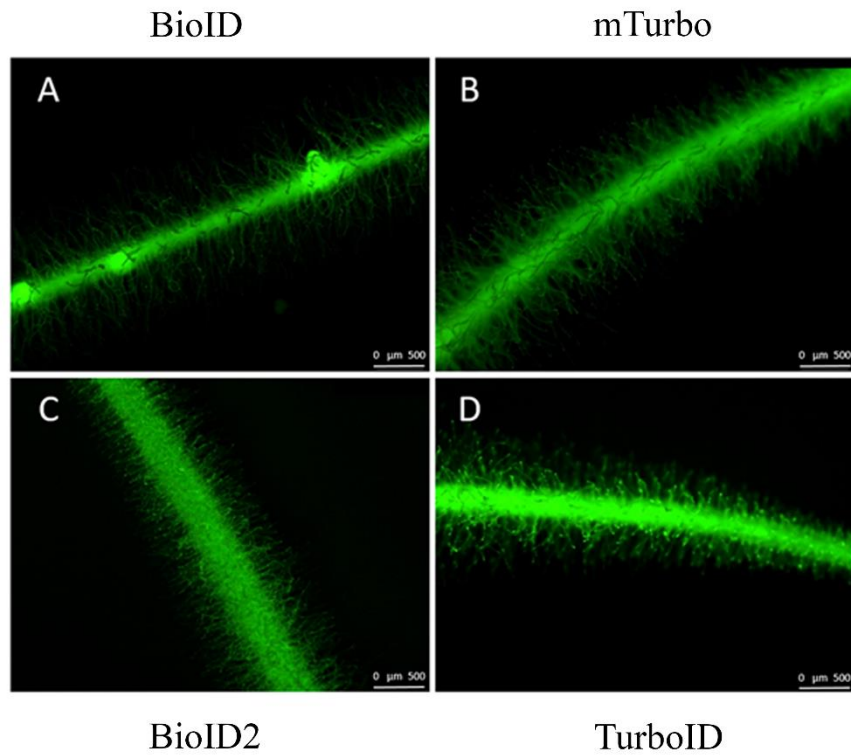

**Supplemental Figure 2. GFP expression in tomato hairy root cultures transformed with rhizogenic *Agrobacterium*.** Fluorescence micrograph images of eGFP expression were obtained from primary hairy roots (~14 days) transformed by rhizogenic *Agrobacterium* with the following expression constructs; Pro35S::eGFP-BioID, Pro35S::eGFP-BioID2, Pro35S::eGFP-TurboID, and Pro35S::eGFP-mTurbo. The scale bars are 500 μm. Images are representative for the four to ten independent roots selected for sub cultivation and showing expression of the marker per construct. This figure supports Figure 1.

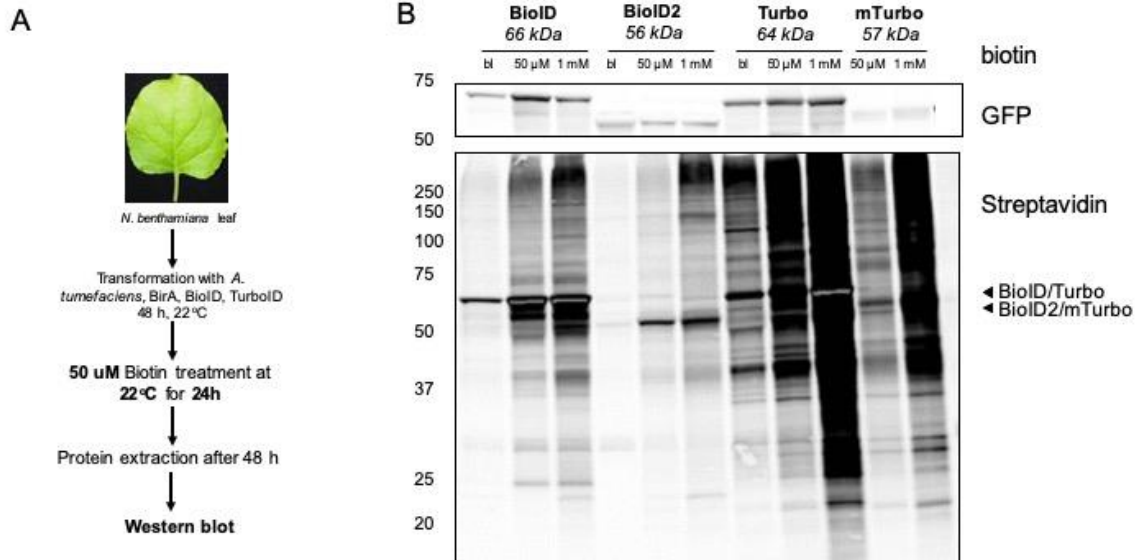

**Supplemental Figure 3. Characterization of PBL-catalysed proximity labelling in *N. benthamiana*.**

(A) Experimental setup. (B) Comparison of biotinylation activity in *N. benthamiana* expressing eGFP-BioID (~66 kDa), eGFP-BioID2 (~56 kDa), eGFP-Turbo (~64 kDa) and eGFP-mTurbo (~57 kDa). Overlapping signal as indicated with a black arrow denote enzyme-catalysed *cis*-biotinylation. Gray bands in intense black areas represent saturation of the streptavidin-s680 signal and is most prominent in case of auto-biotinylation activity. Blank lanes (bl) depict endogenously biotinylated proteins. Two infiltrated tobacco leaf segments/leaves were analyzed per setup and the experiment was repeated twice with similar results. This figure supports Figure 1.

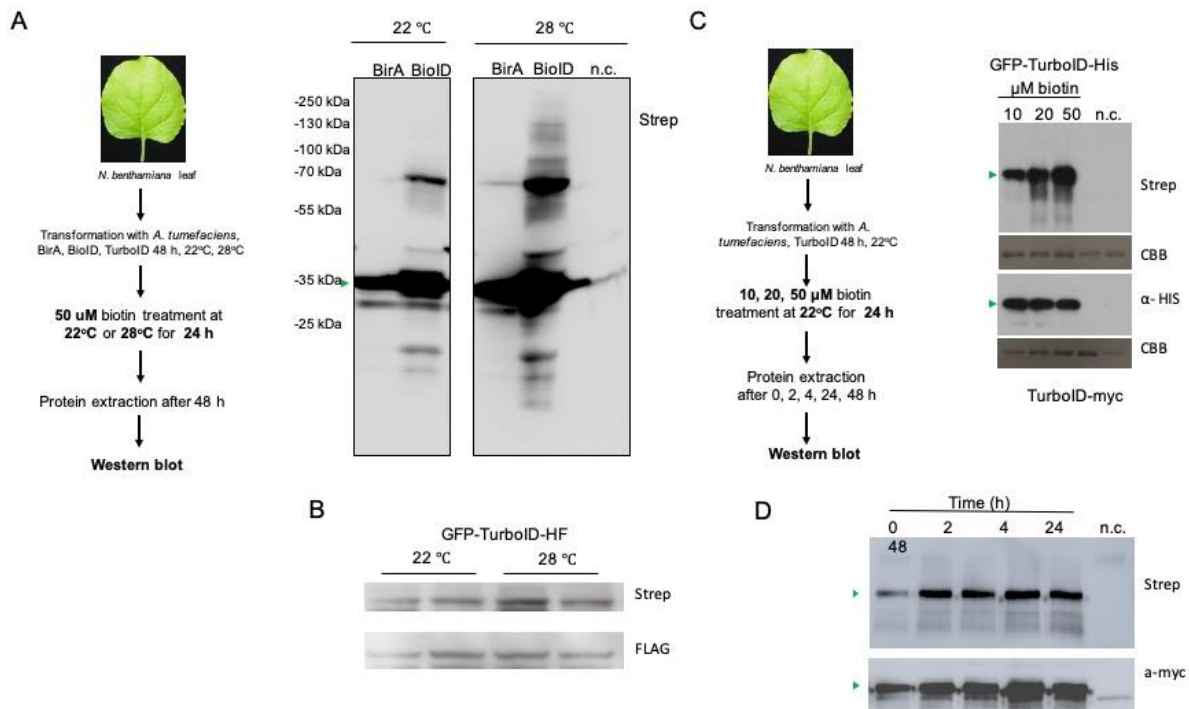

**Supplemental Figure 4. Biotinylation of BioID increases at elevated growth temperature and biotin concentration in *Nicotiana benthamiana*.** (A) The left panel shows the experimental setup. Western blot: The wild-type version of BioID (BirA) shows residual cis-biotinylation activity at both 22°C and 28°C. (B) BioID shows promiscuous biotinylation which increases with temperature. The samples were run on the same blot along with other ones. The blot was cropped to allow a direct comparison between the samples shown. GFP-TurboID-HF activity was ~2 fold increased at higher temperature (i.e. when going from 22°C to 28°C). Two biological replicates are depicted. (C) The left panel shows the experimental setup. Increasing biotin levels elevated biotinylation efficiency. (D) Efficient cis-biotinylation was observed already 2 h after biotin administration. For (C) and (D), green arrowheads show the corresponding BL. N.c. negative control (empty vector). This figure supports Figure 2.

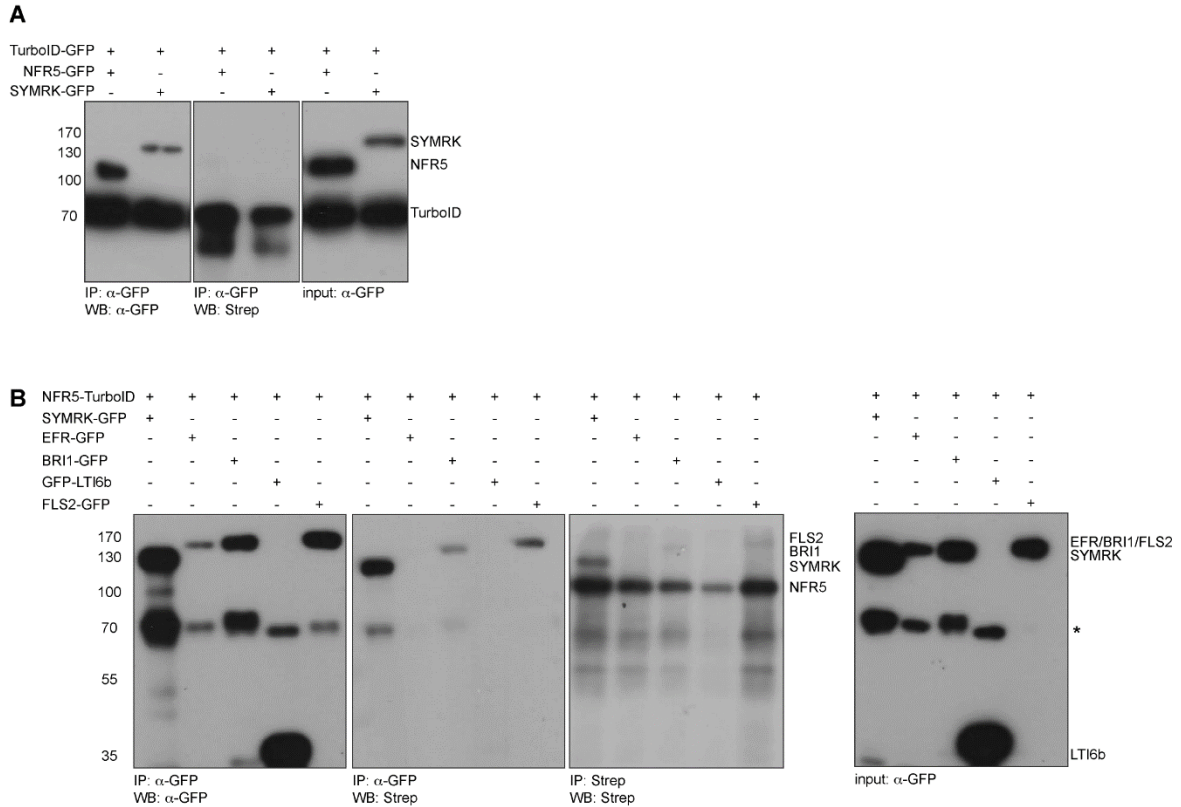

**Supplemental Figure 5. *Trans*-biotinylation within membrane-resident receptor complexes.** (A) TurboID-GFP was co-expressed with symbiotic RLKs to test for unspecific *trans*-biotinylation. While all proteins were detected before (right panel) and after immunoprecipitation (left panel), no *trans*-biotinylation of the receptors was observed under these conditions (middle panel). The activity of TurboID is indicated by *cis*-biotinylation of TurboID-GFP (70 kDa). (B) Fusing TurboID to NFR5 (120 kDa) resulted in strong *trans*-biotinylation of the known interaction partner SYMRK (150 kDa), weak signals were detected in case of the PM-resident receptors BRI1 and FLS2, while no *trans*-biotinylation of EFR and the PM-marker LTI6b were detected. Temporally limiting the reaction results in weak but specifically detectable bands in case of NFR5-TurboID and SYMRK-GFP. Biotin was applied for 2 hours. IP= immunoprecipitation; WB= Western Blot. \*= unclassified band. Strep= Streptavidin. This figure supports Figure 2.

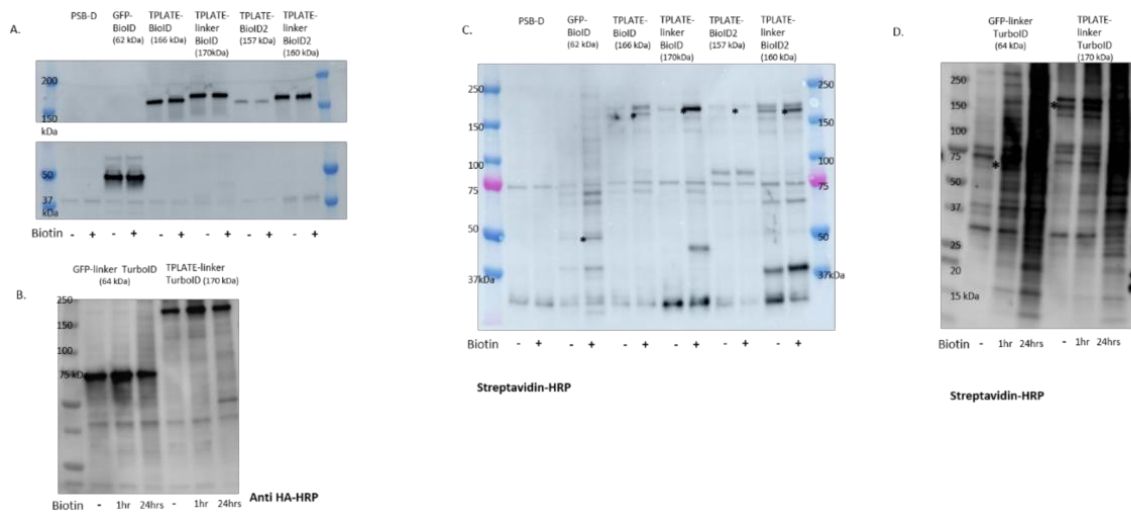

**Supplemental Figure 6. Different PBL cause different *cis*- and *trans*-biotinylation.** *Arabidopsis* cell cultures expressing different TPLATE-PBLs were incubated with 50 $\mu$ M biotin at 28°C for 24 h or for both 24 h and 1 h (linkerTurboID cultures) before harvesting. (A and B) Anti-HA HRP Western blotting was performed to visualize expression levels of the different cultures. (C and D) Streptavidin-HRP Western blotting of different TPLATE-PBLs, GFP-BioID and control cell cultures (PSB-D). *Cis*-biotinylation of the bait and *trans*-biotinylation can clearly be observed. \* indicates *cis*-biotinylation of the bait. This figure supports Figure 4.

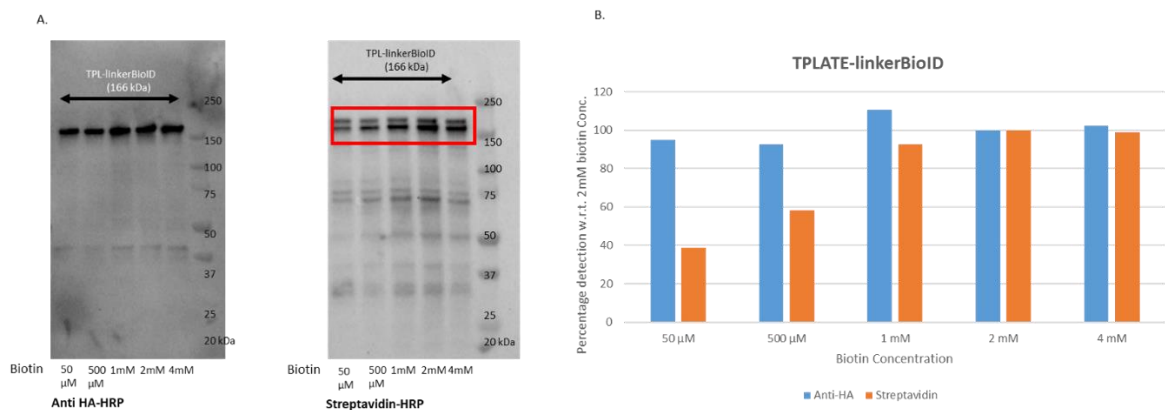

**Supplemental Figure 7. *Cis*-biotinylation of TPLATE-linkerBioID increases at higher concentration of exogenous biotin.** Cell cultures expressing TPLATE-linkerBioID were incubated with biotin (50 $\mu$ M to 4mM) at 28°C for 24 h. (A) Anti-HA HRP Western immunostaining was performed to check protein expression while streptavidin-HRP Western immunostaining was used to assess the biotinylation levels of TPLATE-BioID. (B) Quantification of the percentage of biotinylation (orange) as well as the expression (blue) for each biotin concentration normalized to the maximum biotinylation efficiency (2mM) using ImageJ. This figure supports Figure 4.

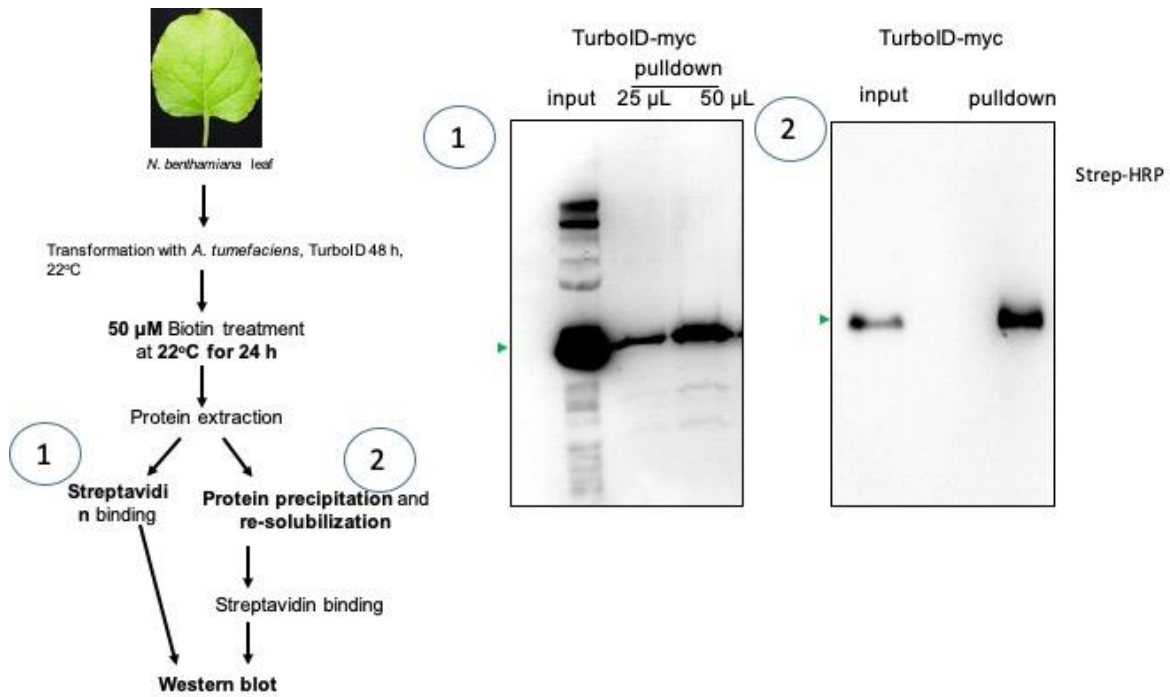

**Supplemental Figure 8. Exogenous application of biotin can exceed the binding capacity of streptavidin beads.** Blot on the left: input and IP with streptavidin using 25 or 50 µl of beads. Note that 2x more beads increased the recovery of the input signal, suggesting that the beads are saturated. Blot on the right: IP with 25 µl of streptavidin beads but in this case the supernatant was precipitated using ammonium acetate to remove excess biotin (in this case, the pull-down is much more than the input). Green arrowheads mark the position of the BL. This figure supports Figure 4.

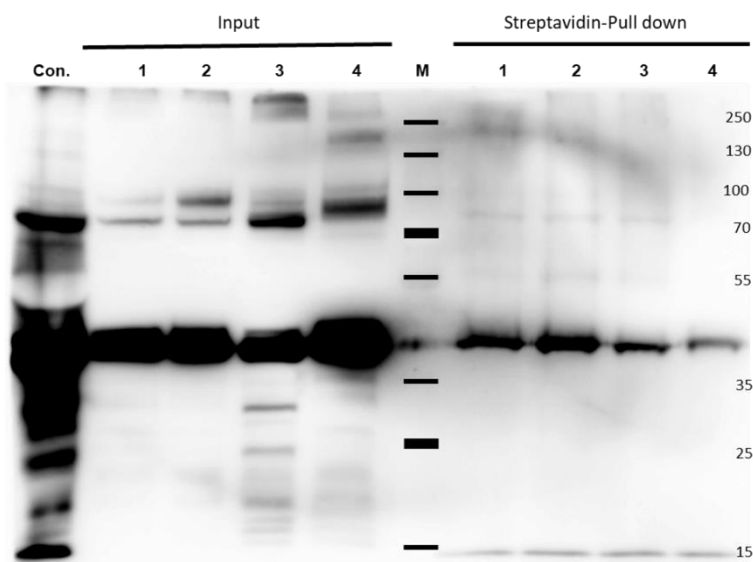

**Supplemental Figure 9. The biotin-streptavidin interaction is retained under harsh conditions.** Different extraction buffers were used for testing the binding affinity of biotin-labelled proteins with streptavidin from equal amounts of plant protein material: 1. 50mM HEPES, 150 mM NaCl, 0.5% NP40,



10% Glycerol, 1mM PMSF; 2. 50mM Tris/HCl, 150 mM NaCl, 0.5% NP40, 10% Glycerol, 1mM PMSF; 3. 1x PBST, 1mM PMSF; 4. 2x Laemmli sample buffer (65 mM Tris-HCl, pH 6.8, 20% (w/v) glycerol, 2% SDS, 0.01% bromophenol blue, 10mM DTT). Con: control. M: marker. Note that the lack of enrichment in the pull-down (right panel) is due to the presence of biotin (see also Supplemental Figure 8). This figure supports Figure 4, Figure 5 and Figure 6.

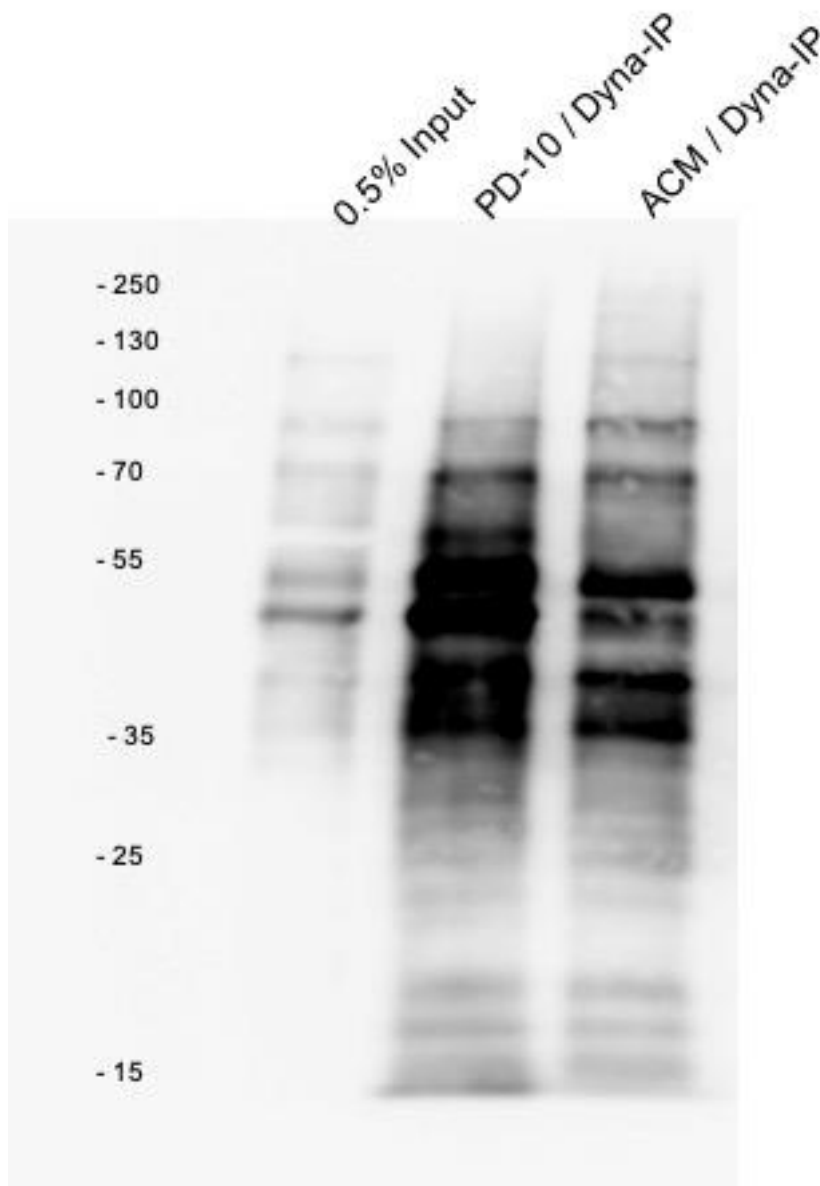

**Supplemental Figure 10. Comparing PD10 versus ammonium acetate for biotin removal.** To test the best way for removing free biotin following sample extraction, the same amount of supernatant (2.5 mL) was either de-salted using PD-10 columns or precipitated by ammonium acetate method (ACM). Next, the PD10-cleared lysate and the ammonium acetate re-dissolved precipitate were incubated with Dynabeads (Dyna-IP) to capture biotinylated proteins. Western blot analysis using anti-streptavidin showed that majority of biotinylated proteins (ca. 15 to 70 kDa) were better enriched in the supernatant by using PD-10 columns. Larger proteins (ca. >100 kDa) were better enriched using ACM.



**Supplemental Table1. List of expression vectors used in this study.**

| Name                  | Vector            | Promoter | Gene          | PBL used                      | Material used                                                               |
|-----------------------|-------------------|----------|---------------|-------------------------------|-----------------------------------------------------------------------------|
| GFP-BioID             | pK7m34Gw          | p35s     | GFP           | BioID                         | <i>Arabidopsis</i> cell culture                                             |
| GFP-BioID2            | pK7m34Gw          | p35s     | GFP           | BioID2                        | <i>Arabidopsis</i> cell culture                                             |
| TPLATE-BioID          | pK7m34Gw          | p35s     | TPLATE        | BioID                         | <i>Arabidopsis</i> cell culture                                             |
| TPLATE-BioID2         | pH7m34Gw-R        | p35s     | TPLATE        | BioID2                        | <i>Arabidopsis</i> cell culture                                             |
| TPLATE-linkerBioID    | pH7m34Gw-R        | p35s     | TPLATE        | (GGGGS) <sub>13</sub> BioID   | <i>Arabidopsis</i> cell culture                                             |
| TPLATE-linkerBioID2   | pH7m34Gw-R        | p35s     | TPLATE        | (GGGGS) <sub>13</sub> BioID   | <i>Arabidopsis</i> cell culture                                             |
| GFP linkerTurboID     | pK7m34Gw          | p35s     | GFP           | (GGGGS) <sub>13</sub> TurboID | <i>Arabidopsis</i> cell culture                                             |
| TPLATE-linkerTurboID  | pK7m34Gw          | p35s     | TPLATE        | (GGGGS) <sub>13</sub> TurboID | <i>Arabidopsis</i> cell culture                                             |
| BirA-myc              | pICSL86900        | p35s     | BirA-myc      | BirA-myc                      | <i>N.benthamiana</i>                                                        |
| BioID-myc             | pICSL86900        | p35s     | BioID-myc     | BioID-myc                     | <i>N.benthamiana</i>                                                        |
| HF-BioID2-HA          | pICSL86900        | p35s     | BioID2-HA     | BioID2-HA                     | <i>N.benthamiana</i>                                                        |
| GFP-TurboID-HF        | pICSL86922        | p35s     | TurboID-HF    | TurboID                       | <i>N.benthamiana</i>                                                        |
| GFP-TurboID-His       | Xpre2-S (pCAMBIA) | p35s     | GFP           | TurboID                       | <i>N.benthamiana</i>                                                        |
| NFR5-TurboID          | Xpre2-S (pCAMBIA) | p35s     | NFR5          | TurboID                       | <i>N.benthamiana</i>                                                        |
| GFP-LTI6b             | Xpre2-S (pCAMBIA) | p35s     | LTI6b         |                               | <i>N.benthamiana</i>                                                        |
| BiFC_CC_TPLATE_BIN2   | BiFC_CC           | p35s     | TPLATE/BIN2   | NA                            | <i>N.benthamiana</i>                                                        |
| BiFC_CC_TPLATE_TOL9   | BiFC_CC           | p35s     | TPLATE/TOL9   | NA                            | <i>N.benthamiana</i>                                                        |
| BiFC_CN_TPLATE_TOL9   | BiFC_CN           | p35s     | TPLATE/TOL9   | NA                            | <i>N.benthamiana</i>                                                        |
| BiFC_CC_TPLATE_SCAMP5 | BiFC_CC           | p35s     | TPLATE/SCAMP5 | NA                            | <i>N.benthamiana</i>                                                        |
| BiFC_CN_TPLATE_SCAMP5 | BiFC_CN           | p35s     | TPLATE/SCAMP5 | NA                            | <i>N.benthamiana</i>                                                        |
| GFP-GGGS-BioID-FLAG   | pK7m34Gw          | p35s     | GFP           | BioID                         | <i>Solanum lycopersicum</i> stable hairy root lines & <i>N. Benthamiana</i> |
| GFP-GGGS-BioID2-FLAG  | pK7m34Gw          | p35s     | GFP           | BioID2                        | <i>Solanum lycopersicum</i> stable hairy root lines & <i>N. Benthamiana</i> |
| GFP-GGGS-TurboID-FLAG | pK7m34Gw          | p35s     | GFP           | TurboID                       | <i>Solanum lycopersicum</i> stable hairy root lines & <i>N. Benthamiana</i> |
| GFP-GGGGS-mTurbo-FLAG | pK7m34Gw          | p35s     | GFP           | mTurbo                        | <i>Solanum lycopersicum</i> stable hairy root lines & <i>N. Benthamiana</i> |

**Supplemental Table 2: list of primers used.**

| Name                              | Primer                                                                                   |
|-----------------------------------|------------------------------------------------------------------------------------------|
| BirA                              | GTGGTCTC A T TCG GGA AAC GCGGCT ATT AGA TCA AAG GAT AAC ACC<br>GTG CCA CTT A             |
| BirA                              | GTGGTCTC A AAGC CTA CAG ATC CTC TTC TGA GAT GAG TTT TTG TTC<br>TTT TTC TGC ACT ACG AAG G |
| BirA                              | GTGGTCTC A CGTAGAGGTCGTAATGGTTTTTC                                                       |
| BirA                              | GTGGTCTC C TACGTCCACGACCAGCCTGCT                                                         |
| HF-Module-Fw                      | GTGGTCTC ACCATGGGTTCCGGAAGAGGATCGCA                                                      |
| HF-Module-Rv                      | GTGGTCTC ACATTCCCTTGTTCATCGTCATCCTTG                                                     |
| BioID2 with long-linker-Module-Fw | agGAAGACaaTTCGGGATCTGGAGGTGGCGGAAG                                                       |
| BioID2 without linker-Module-Fw   | agGAAGACaaTTCGTTTAAGAAGCTTGATATGGCTGAAAG                                                 |
| ScFv-superfolder-GFP-Module-Fw    | GTGGTCTC A ATGG GCCCCGACATCGT                                                            |
| ScFv-superfolder-GFP-Module-Fw    | GTGGTCTC A CGAA CCACCTTTGTAGAGCTC                                                        |
| NotImcherryu                      | GCGGCCGCATGGTGAGCAAGGGCGAGGAG                                                            |
| NotImcherryd                      | GCGGCCGCTTACTTGTACAGCTCGTCC ATG                                                          |
| attB1_SCAMP5_FWD                  | GGGGACAAGTTTGTACAAAAAAGCAGGCTTAATGAATCGCCACCACGATC<br>CCAATCC                            |
| attB4_SCAMP5_REV                  | GGGGACAAGTTTGTATAGAAAAGTTGGGTGCTTGTTTCCCCTAAAGTAGAG<br>GTAAATTTTCTG                      |
| attB3_TPLATE_FWD                  | GGGGACAAGTTTGTATAATAAAGTTGTAATGGACATTCTTTTTGCTCAGATC<br>CAGGC                            |
| attB2-TPLATE_REV                  | GGGGACCACTTTGTACAAGAAAGCTGGGTTGTTAACTTTGGTATATTTTCTA<br>TCTTTGCACAAGATG                  |
| attB1_TOL9_FWD                    | GGGGACAAGTTTGTACAAAAAAGCAGGCTTAATGGTGAACGCTATGG                                          |
| attB4_TOL9_REV                    | GGGGACAAGTTTGTATAGAAAAGTTGGGTGTCACATGGTACCAGCTC                                          |

**Supplemental Table 3: Cell cultures expressing different TPLATE-PBLs identifies TPC subunits with different amount of non-biotinylated peptides.** The table shows the amount of non-biotinylated peptides identified for TPC subunits in GFP and TPLATE-BioIDs PBL cell cultures. Preparation of samples for LC-MS/MS involved the use of a buffer containing 8M Urea and 2% SDS. Cell cultures were incubated with either 50µM or 2mM biotin for 24 hours before harvesting. This table shows higher amount of peptides detected for all TPC subunits in case of linkerTurboID constructs than other BioIDs PBL. Also, it shows higher amounts of peptides detected in TurboID control experiments (GFP-linkerTurboID vs. GFP-BioID and GFP-BioID2) suggesting increased promiscuity of TurboID. This table supports Figure 4.

| Total number of unique non-biotinylated peptides identified for each TPC subunit |           |           |           |           |           |           |           |
|----------------------------------------------------------------------------------|-----------|-----------|-----------|-----------|-----------|-----------|-----------|
|                                                                                  | AT1G20760 | AT1G21630 | AT2G07360 | AT3G01780 | AT3G50590 | AT5G24710 | AT5G57460 |
|                                                                                  | AtEH1     | AtEH2     | TASH3     | TPLATE    | TWD40-1   | TWD40-2   | TML       |
| TPLATE linkerTurboID                                                             | 73        | 155       | 205       | 384       | 228       | 374       | 116       |
| GFP linkerTurboID                                                                | 40        | 98        | 122       | 27        | 102       | 271       | 21        |
| TPLATE BioID                                                                     | 20        | 32        | 2         | 428       | 68        | 95        | 37        |
| TPLATE linkerBioID                                                               | 19        | 37        | 15        | 540       | 35        | 34        | 16        |
| GFP BioID                                                                        | -         | -         | -         | -         | -         | 26        | -         |
| TPLATE BioID2                                                                    | 9         | 30        | -         | 157       | 42        | 38        | 51        |
| TPLATE linkerBioID2                                                              | 24        | 55        | 59        | 453       | 107       | 89        | 38        |
| GFP BioID2                                                                       | -         | -         | 6         | -         | -         | 42        | -         |
| TPLATE linkerBioID 2mM                                                           | -         | -         | -         | 10        | -         | -         | -         |

**Supplemental Table 4. Full list of significantly enriched identifications with TPLATE-BioID versus GFP-BioID at different incubation temperatures for 24 hours with 50 µM biotin.**

The table shows the amount of non-biotinylated peptides identified for TPC subunits in GFP and TPLATE-BioID PBLs at different temperatures (25°, 28°, 30° and 35°). Cell cultures were incubated with 50µM biotin for 24 hours. This table supports figure 3.

**Supplemental Table 5. Full list of significantly enriched identifications with TPLATE as bait using BioID, BioID2, linkerBioID, linkerBioID2, linkerTurboID E1, linkerTurboID E2 and linkerTurboID E1+E2, versus the respective GFP PBLs.** This table shows the amount of non-biotinylated peptides identified for TPC subunits in GFP and various TPLATE-PBLs. Cell cultures were treated with either 50 µM or 2mM biotin at 28°C for 24 hours. This table supports Figure 4.

**Supplemental Table 6. Full list of significantly enriched hits with either TPLATE PBLs or GSRhino PD, including average iBAQ values normalized versus TPLATE.** The table shows the normalized MaxQuant iBAQ values of all proteins that were significantly enriched in TPLATE-GSRhino (PD), TPLATE-linkerBioID (LBioID), TPLATE-linkerBioID2 (LBioID2) or TPLATE-linkerTurboID (LTurboID) compared to the respective control samples. Colored cells (red for PD, orange for LBioID, green for

LBioID2 and blue for LTurboID) are proteins that are significantly enriched for those experiments. This table supports Figure 5.

**Supplemental Table 7. Full list of significantly enriched hits with TPLATE-linkerTurboID, including average iBAQ values normalized versus TPLATE, at different incubation times at 25 degrees and 24-hour incubation time at 28 degrees, all with 50  $\mu$ M biotin.** The table shows the normalized MaxQuant iBAQ values of all proteins that were significantly enriched in TPLATE-linkerTurboID (LTurboID) at different temperatures (25°C or 28°C) and biotin treatments (10 mins, 1 hour, 6 hours and 24 hours) compared to the respective control samples. Colored cells (red for 25°C, 10 mins, orange for 25°C, 1 hour, green for 25°C, 6 hours and blue triangle for 25°C, 24 hours and dark blue circle for 28°C, 24 hours) are proteins that are significantly enriched for those experiments. This table supports Figure 6.

**Supplemental Table 8. MaxQuant TPC subunits peptides in TPLATE-LTurboID.** The table shows the amount of biotinylated and non-biotinylated peptides identified for TPC subunits in the TPLATE-linkerTurboID culture. The cell culture was treated with 50  $\mu$ M biotin at 28°C for 24 hours. This table supports Figure 7.

#### Supplemental sequences. List of all used PBL sequences.

AttR2\_BioID-3xHA\_attL3

```
AttR2_GACAAGGACAACACCGTACCCCTGAAGCTCATCGCACTACTTGCTAATGGTGAATTTCACTCCGGGGAA
CAGCTAGGAGAAACACTCGGCATGTCAAGAGCAGCAATAAACAAGCATATACAAACACTCCGTGACTGGGGCGTG
GATGTATTTACCGTCCCTGGTAAGGGATACTCCCTCCCGGAACCAATCCAACCTTCTCAATGCCAAGCAGATTCTA
GGTCAACTCGATGGTGGCTCAGTGGCGGTTTTACCAGTAATAGACTCTACGAACCAGTATCTGCTCGACCGAATA
GGGGAGCTTAAATCCGGAGATGCTTGCATTGCGGAATATCAACAAGCCGGACGTGGTGGCAGGGGAAGGAAGTGG
TTCAGTCCCTTCGGCGCAATCTCTATCTGAGCATGTTCTGGCGACTTGAACAGGGTCCC CGGGCCGCTATCGGC
CTATCCTTAGTTATAGGTATCGTCATGGCTGAGGTCCTCAGAAAGCTAGGGGCTGACAAGGTGAGGGTAAAAATGG
CCTAATGACCTCTATCTTCAAGATAGAAAGTTGGCCGGTATCTTAGTGGAATTAACGGGAAAAGACCGGCGATGCT
GCACAGATCGTGATCGGTGCGGGAATTAACATGGCCATGCGACGAGTGGAAGAAAAGCGTTGTTAATCAGGGATGG
ATTACGCTACAAGAAGCCGGTATAAATCTTGACCCGTAACACCCTAGCAGCCATGCTGATCCGTGAACTACGAGCG
CGTTGGAACTTTTTGAACAGGAGGGTTTTGGCACCTTACCTTAGCCGATGGGAAAACCTCGACAACCTTCATTAAC
CGTCCCCTCAAATGATTATTGGCGATAAGGAAATTTTTCGGAATAAGTAGAGGGATCGATAAGCAGGGAGCGTTA
CTACTTGAGCAGGATGGTATCATAAAGCCGTGGATGGGAGGCGAAAATTTCACTCCGTAGCGCCGAAAAGGCC TAC
CCATACGATGTTCCAGATTACGCTTACCCATACGATGTTCCAGATTACGCTTACCCATACGATGTTCCAGATTAC
GCTTGA_attL3.
```

AttR2\_BioID2-3xHA\_attL3

```
AttR2_GACTTCAAAAACCTTAATTTGGTTAAAAGAAGTGGATTCAACACAGGAGCGACTTAAAGAATGGAATGTA
AGTTACGGCACGGCATTAGTTGCCGATCGTCAAACGAAGGGAAGAGGAGGGTTGGGGCGTAAGTGGCTAAGTCAG
GAAGGTGGGCTATACTTCAAGTTTTCTTCTGAATCCGAAGGAGTTCGAGAACCTGCTACAATTACCGCTCGTACTG
GGCCTGAGTGTGAGCGAGGCTTTAGAAGAAATTACAGAAATCCCCTTCAAGTTGAAAGTGGCCAAATGATGCTAT
TTTCAGGAAAAGAAAGTCTCTGGCGTACTGTGCGAACTATCAAAGGATAAGCTGATCGTAGGAATCGGTATAAAT
GTTAATCAACGAGAGATCCCGGAGGAAATCAAAGACAGAGCAACCACGTTATATGAGATTACCGGGAAGGACTGG
GATAGGAAAGAGGTAATTAAGGTAATAAGGCAATATCAGAAAATCTCAAGAAATTCAGGAAAAAGGCTTC
AAAGAATTCAAAGGCAAGATTGAAAGCAAGATGCTATACCTCGGGGAAGAGGTTAAGTTGCTTGGGGAAAGGAAAA
ATTACTGGTAAGCTGGTTGGCCTGAGCGAAAAGGGCGGTGCTCTCATTTTAACTGAGGAAGGGATCAAAGAAATC
TTGAGCGGAGAGTTCTCCTTGCCTCGAAGCGCCTACCCATACGATGTTCCAGATTACGCTTACCCATACGATGTT
CCAGATTACGCTTACCCATACGATGTTCCAGATTACGCTTGA_attL3.
```

AttR2 **linkerBioID-3xHA**\_attL3

AttR2 **GGTGGCGGAGGTTCTGGCGGTGGAGGATCCGGAGGTGGCGGGTCCGGTGGTGGCGGATCAGGTGGAGGA  
GGTTCGGGAGGCGGAGGTAGTGGAGGCGGTGGGAGCGGCGGAGGTGGGAGCGGTGGCGGAGGGAGTGGAGGTGGA  
GGCTCGGGCGGAGGTGGCTCCGGCGGAGGTGGGTCTGGAGGCGGTGGCTCG**GACAAGGACAACACCCGTACCCCTG  
AAGCTCATCGCACTACTTGCTAATGGTGAATTTCACTCCGGGGAACAGCTAGGAGAAACACTCGGCATGTCAAGA  
GCAGCAATAAACAAGCATATACAACACTCCGTGACTGGGGCGTGGATGTATTTACCGTCCCTGGTAAGGGATAC  
TCCCTCCCGGAACCAATCCAACCTTCTCAATGCCAAGCAGATTCTAGGTCAACTCGATGGTGGCTCAGTGGCGGTT  
TTACCAGTAATAGACTTACGAACCAGTATCTGCTCGACCGAATAGGGGAGCTTAAATCCGGAGATGCTTGCATT  
GCGGAATATCAACAAGCCGGACGTGGTGGCAGGGGAAGGAAGTGGTTCAGTCCCTTCGGCGGAATCTCTATCTG  
AGCATGTTCTGGCGACTTGAACAGGGTCCCGCGGCCCTATCGGCCATCCTTAGTTATAGGTATCGTCATGGCT  
GAGGTCCTCAGAAAGCTAGGGGCTGACAAGGTGAGGGTAAAATGGCCTAATGACCTCTATCTTCAAGATAGAAAAG  
TTGGCCGATCTTAGTGAATTAACGGGAAAGACCGGCGATGCTGCACAGATCGTGATCGGTGCGGGAATTAAC  
ATGGCCATGCGACGAGTGAAGAAAGCGTTGTTAATCAGGGATGGATTACGCTACAAGAAGCCGGTATAAATCTT  
GACCGTAACACCCTAGCAGCCATGCTGATCCGTGAACTACGAGCGGCGTTGGAACCTTTTTGAACAGGAGGGTTT  
GCACCTTACCTTAGCCGATGGGAAAACCTCGACAACCTTCAATTAACCGTCCCGTCAAATTGATTATTGGCGATAAG  
GAAATTTTCGGAATAAGTAGAGGGATCGATAAGCAGGGAGCGTTACTACTTGAGCAGGATGGTATCATAAAGCCG  
TGGATGGGAGGCGAAATTTCACTCCGTAGCGCCGAAAAGGCC**TACCCATACGATGTTCCAGATTACGCTTACCCA  
TACGATGTTCCAGATTACGCTTACCCATACGATGTTCCAGATTACGCT**TGA\_attL3.

AttR2 **linkerBioID2-3xHA**\_attL3

AttR2 **GGTGGCGGAGGTTCTGGCGGTGGAGGATCCGGAGGTGGCGGGTCCGGTGGTGGCGGATCAGGTGGAGGA  
GGTTCGGGAGGCGGAGGTAGTGGAGGCGGTGGGAGCGGCGGAGGTGGGAGCGGTGGCGGAGGGAGTGGAGGTGGA  
GGCTCGGGCGGAGGTGGCTCCGGCGGAGGTGGGTCTGGAGGCGGTGGCTCG**GACTTCAAAAACCTAATTTGGTTA  
AAAGAAGTGGATTCAACACAGGAGCGACTTAAAGAATGGAATGTAAGTTACGGCACGGCATTAGTTGCCGATCGT  
CAAACGAAGGGAAGAGGAGGGTTGGGGCGTAAGTGGCTAAGTCAGGAAGGTGGGTATACTTACGTTTCTCTG  
AATCCGAAGGAGTTCGAGAACCTGCTACAATTACCGCTCGTACTGGGCCTGAGTGTGAGCGAGGCTTTAGAAGAA  
ATTACAGAAATCCCCTTACGTTTGAAGTGGCCAAATGATGTCTATTTTCAGGAAAAGAAAAGTCTCTGGCGTACTG  
TGCGAACTATCAAAGGATAAGCTGATCGTAGGAATCGGTATAAATGTTAATCAACGAGAGATCCCGGAGGAAATC  
AAAGACAGAGCAACCACGTTATATGAGATTACCGGAAGGACTGGGATAGGAAAAGAGGTAATTTAAAGGTAATA  
AAGCGAATATCAGAAAATCTCAAGAAATTCAGGAAAAAAGCTTCAAAGAATTCAAAGGCAAGATTGAAAAGCAAG  
ATGCTATACCTCGGGGAAGAGGTTAAGTTGCTTGGGGAAGGAAAAAATTACTGGTAAGCTGGTTGGCCTGAGCGAA  
AAGGGCGGTGCTCTCATTTTAACTGAGGAAGGGATCAAAGAAATCTTGAGCGGAGAGTCTCCTTGCGTCGAAGC  
GCCTACCCATACGATGTTCCAGATTACGCTTACCCATACGATGTTCCAGATTACGCTTACCCATACGATGTTCCA  
GATTACGCTTGA\_attL3.

AttR2 **linkerTurboID-3xHA**\_attL3

AttR2 **GGTGGCGGAGGTTCTGGCGGTGGAGGATCCGGAGGTGGCGGGTCCGGTGGTGGCGGATCAGGTGGAGGA  
GGTTCGGGAGGCGGAGGTAGTGGAGGCGGTGGGAGCGGCGGAGGTGGGAGCGGTGGCGGAGGGAGTGGAGGTGGA  
GGCTCGGGCGGAGGTGGCTCCGGCGGAGGTGGGTCTGGAGGCGGTGGCTCG**GACAAAGACAATACCGTGCCTC  
AAACTAATTGCATTGCTTGGCCAATGGTGAGTTCCATTCTGGGGAACAACCTGGGGAGACTCTGGGCATGTCCCGA  
GCGGCCATTAATAAGCACATACAGACTTTGAGGGACTGGGGTGTGATGTGTTTACAGTACCGGGTAAGGGATAT  
TCTCTGCCGAGCCGATAACCTTTACTCAATGCAAAGCAGATTTTAGGACAGCTGGATGGCGGGAGCGTGGCTGTC  
CTCCCGGTGGTGCATAGTACAAATCAATATCTTTTGGACAGGATCGGTGAGCTGAAATCTGGAGATGCTTGCATA  
GCGGAATACCAACAAGCTGGTAGGGGATCTCGAGGCCGAAAAGTGGTTTTACCCCTTTGGGGCCAACCTATACTTA  
TCCATGTTCTGGCGTCTGAAACGTGGCCCGCAGCCATAGGGCTAGGGCCGTAATTGGGATCGTTATGGCGGAA  
GCGTTACGAAAGTTGGGAGCCGATAAAGTCAGAGTAAAGTGGCCAAATGATCTTTATTTACAAGATAGAAAGCTG  
GCGGGCATTCTTGTGAGCTTGGCGGAATAACAGGCGATGCCGCACAGATCGTTATAGGGCCGGGATTAATGTG  
GCTATGAGGAGGGTCAAGAAAGTGTGTGAATCAAGGATGGATTACTCTCCAAGAGGCGGGTATAAATCTTGAT  
CGAAATACTCTAGCTGCAACCTTGATACGAGAGCTAAGAGCAGCACTAGAATTGTTTGAACAAGAAGGGCTGGCC  
CCATATCTCCCTCGATGGGAGAAGTTGGACAATTTTATAAACAGACCGGTGAAGTTAATCATTGGAGACAAAGAA  
ATTTTCGGTATAAGCCGTGGGATCGATAAACAGGGTGTCTTCTCCTTGAGCAGGACGGTGTGCATCAAGCCTTGG  
ATGGGAGGCGAAATCTCTCTCCGAAGCGCCGAGAAGAAGCTTGCCTACCCATACGATGTTCCAGATTACGCTTAC  
CCATACGATGTTCCAGATTACGCTTACCCATACGATGTTCCAGATTACGCT TGA\_attL3.

**attL4-omegaleader-start-3xHA-TurboID-(GGGS)<sub>13</sub>linker-attR1**

AAATAATGATTTTATTTTACTGATAGTGACCTGTTTCGTTGCAACAAATTGATAAGCAATGCTTTTTTATAATGCAACTTTGTATAGAAAAGTTGAACAACAACAACAACAACAATTACAATTACAATGTACCCATACGATGTTCCAGATTACGCTTACCCATACGATGTTCCAGATTACGCTTACCCATACGATGTTCCAGATTACGCTGCCAAAGACAATACCGTGCCCTCAAACATAATTGCATTGCTTGCCAATGGTGAGTTCCATTCTGGGGAACAACCTTGGGGAGACTCTGGCATGTCCCGAGCGGCCATTAATAAGCACATACAGACTTTGAGGGACTGGGGTGTTCGATGTGTTTACAGTACCGGTAAGGGATATTCTCTGCCGGAGCCGATACTTTACTCAATGCAAAGCAGATTTTAGGACAGCTGGATGGCGGGA GCGTGGCTGTCTCCCGGTGGTCGATAGTACAAATCAATATCTTTTGGACAGGATCGGTGAGCTGAAATCTGGAGATGCTTGATAGCGGAATACCAACAAGCTGGTAGGGGATCTCGAGGCCGAAAGTGGTTTTACCCCTTTGGGGCCA ACTTATACTTATCCATGTTCTGGCGTCTGAAACGTGGCCCGCAGCCATAGGGCTAGGGCCCGTAATTGGGATCG TTATGGCGGAAGCGTTACGAAAGTTGGGAGCCGATAAAGTCAGAGTAAAGTGGCCAAATGATCTTTATTTACAAAG ATAGAAAGCTGGCGGGCATTCTTGTGAGCTTGCCGGAATAACAGGCGATGCCGCACAGATCGTTATAGGGGCCG GGATTAATGTGGCTATGAGGAGGGTCGAAGAAAGTGTGTGAATCAAGGATGGATTACTCTCCAAGAGGCGGGTA TAAATCTTGATCGAAATACTCTAGCTGCAACCTTGATACGAGAGCTAAGAGCAGCACTAGAATTGTTTGAACAAG AAGGGCTGGCCCCATATCTCCCTCGATGGGAGAAGTTGGACAATTTTATAAACAGACCCGTGAAGTTAATCATTG GAGACAAAGAAATTTTCGGTATAAGCCGTGGGATCGATAAACAGGGTGCTCTTCTCCTTGAGCAGGACGGTGTCATCAAGCCTTGATGGGAGGCGAAATCTCTCTCCGAAGCGCCGAGAAGAAGCTTGACGGTGGCGGAGGTTCTGGCG GTGGAGGATCCGGAGGTGGCGGGTCCGGTGGTGGCGGATCAGGTGGAGGAGGTTCCGGAGGCGGAGGTAGTGGAG GCGGTGGGAGCGGCGGAGGTGGGAGCGGTGGCGGAGGGAGTGGAGGTGGAGGCTCGGGCGGAGGTGGCTCCGGCG GAGGTGGGTCTGGAGGCGGTGGCTCGGCAAGTTTGTACAAAAAAGTTGAACGAGAAACGTAATAATAATAATA TCAATATATTAATTAGATTTTGCATAAAAAACAGACTACATAATACTGTAAAAACACAACATATGCAGTCACTAT G

AttR2\_GGGGS-BioID-FLAG\_attL3

AttR2\_GGAGGCGGTGGATCGAAGGACAACACCGTGCCCTGAAGCTGATCGCCCTGCTGGCCAACGGCGAGTTCCACAGCGCGAGCAGCTGGGCGAGACCCTGGGCATGAGCCGGGCCCATCAACAAGCACATCCAGACCCTGCGG GACTGGGGCGTGGACGTGTTACCCTGCCCCGCAAGGGCTACAGCCTGCCCGAGCCCATCCAGCTGCTGAACGCC AAGCAGATCCTGGGCCAGCTGGACGGCGGCAGCGTGGCCGTGCTGCCCGTGCATCGCAGCAGCAACCAAGTACCTG CTGGACCGGATCGGCGAGCTGAAGAGCGGCAGCAGCCTGCATCGCCGAGTACCAGCAGGCCCGCCGGGGCGCCGG GGCCGGAAGTGGTTCAGCCCCCTTCGGCGCCAACCTGTACCTGAGCATGTTCTGGCGGTGGAGCAGGGCCCCGCC GCCGCCATCGGCCTGAGCCTGGTGATCGGCATCGTGATGGCCGAGGTGCTGCGGAAGCTGGGCGCCGACAAGGTG CGGGTGAAGTGGCCCAACGACCTGTACCTGCAGGACCGGAAGCTGGCCGCATCCTGGTGGAGCTGACCGGCAAG ACCGGCGACGCCGCCAGATCGTGATCGGCGCCGGCATCAACATGGCCATGCGGCGGGTGGAGGAGAGCGTGGTG AACAGGGCTGGATCACCTGCAGGAGGCCGGCATCAACCTGGACCGGAACACCTGGCCGCATGCTGATCCGG GAGCTGCGGGCCGCCCTGGAGCTGTTTCGAGCAGGAGGGCCTGGCCCCCTACCTGAGCCGGTGGGAGAAGCTGGAC AACTTCATCAACCGGCCCGTGAAGCTGATCATCGGCGACAAGGAGATCTTCGGCATCAGCCGGGCATCGACAAG CAGGGCGCCCTGCTGCTGGAGCAGGACGGCATCATCAAGCCCTGGATGGGCGGCGAGATCAGCTGCGGAGCGCC GAGAAGGACTACAAAGACGATGACGATAAAATGA\_attL3

AttR2\_GGGGS-BioID2-FLAG\_attL3

AttR2\_GGAGGCGGTGGATCGTTCAAGAACCTGATCTGGCTGAAGGAGGTGGACAGCACCCAGGAGAGACTGAAG GAGTGGACGTGAGTACGGCACCCCTGGTGGCCGACAGACAGACCAAGGGCAGAGGCGGCTGGGCAGAAAG TGGCTGAGCCAGGAGGGCGGCCTGTACTTCAGCTTCTGCTGAACCCCAAGGAGTTCGAGAACCTGCTGCAGCTG CCCCTGGTGTGGCCCTGAGCGTGGAGGAGGAGGATCAGGAGATCAGGATCCCTTCAGCTGAAGTGGCCC AACGACGTGTAATTCAGGAGAAGAAGGTGAGCGGCGTGTGTGCGAGCTGAGCAAGGACAAGCTGATCGTGGGC ATCGGCATCAACGTGAACAGAGAGAGATCCCCGAGGAGATCAAGGACAGAGCCACCACCTGTACGAGATCACC GGCAAGGACTGGGACAGAAAGGAGGTGCTGCTGAAGGTGCTGAAGAGAATCAGCGAGAACCTGAAGAAGTTCAAG GAGAAGAGCTTCAAGGAGTTCAAGGGCAAGATCGAGAGCAAGATGCTGTACCTGGGCGAGGAGGTGAAGCTGCTG GCGGAGGGCAAGATCACCGGCAAGCTGGTGGCCCTGAGCGAGAAGGGCGGCGCCCTGATCCTGACCGAGGAGGGC ATCAAGGAGATCCTGAGCGGCGAGTTCAGCCTGAGAAGAAGCGACTACAAAGACGATGACGATAAAATGA\_attL3

AttR2\_GGGGS-TurboID-FLAG\_attL3

AttR2\_GGAGGCGGTGGATCGAAAGACAATACTGTGCCTCTGAAGCTGATCGCTCTCCTGGCTAATGGCGAGTTCCATAGTGGCGAACAGCTGGGAGAAACCCTGGGCATGTCCAGGGCCGCTATCAACAAGCACATTCAGACTCTGCGC GACTGGGGCGTGGACGTGTTACCCTGCCCCGAAAGGGCTACTCTCTGCCCGAGCCTATCCCGCTGCTGAACGCT AACAGATTCTGGGACAGCTGGACGGCGGGAGCGTGGCAGTCTGCCTGTGGTGCAGTCCACCAATCAGTACCTG CTGGATCGAATCGGCGAGCTGAAGAGTGGGGATGCTTGCAATTGCAGAATATCAGCAGGCAGGGAGAGGAAGCAGA GGGAGGAAATGGTCTCTCCTTTTGGAGCTAACCTGTACCTGAGTATGTTTTGGCGCTGAAGCGGGGACCAGCA GCAATCGCCCTGGGCCCCGTCATCGGAATTGTCATGGCAGAAGCGCTGCGAAAGCTGGGAGCAGACAAGGTGCGA

GTCAAATGGCCCAATGACCTGTATCTGCAGGATAGAAAGCTGGCAGGCATCCTGGTGGAGCTGGCCGGAATAACA  
GGCGATGCTGCACAGATCGTCATTGGCGCCGGGATTAACGTGGCTATGAGGCGCGTGGAGGAAAGCGTGGTCAAT  
CAGGGCTGGATCACACTGCAGGAAGCAGGGATTAACCTGGACAGGAATACTCTGGCCGCTACGCTGATCCGAGAG  
CTGCGGGCAGCCCTGGAAGCTGTTTCGAGCAGGAAGGCCTGGCTCCATATCTGCCACGGTGGGAGAAGCTGGATAAC  
TTCATCAATAGACCCGTGAAGCTGATCATTGGGGACAAAGAGATTTTCGGGATTAGCCGGGGGATTGATAAACAG  
GGAGCCCTGCTGCTGGAACAGGACGGAGTTATCAAACCCTGGATGGGCGGAGAAATCAGTCTGCGGTCTGCCGAA  
AAGGACTACAAAGACGATGACGATAAA TGA\_attL3

Attr2\_ GGGGS-miniTurboID-FLAG\_attL3

Attr2\_ GGAGGCGGTGGATCGATCCCCGCTGCTGAACGCTAAACAGATTCTGGGACAGCTGGACGGCGGGAGCGTG  
GCAGTCCCTGCCTGTGGTCGACTCCACCAATCAGTACCTGCTGGATCGAATCGGCGAGCTGAAGAGTGGGGATGCT  
TGCATTGCAGAATATCAGCAGGCAGGGAGAGGAAGCAGAGGGAGGAAATGGTTCTCTCCTTTTGGAGCTAACCTG  
TACCTGAGTATGTTTTGGCGCCTGAAGCGGGGACCAGCAGCAATCGGCCTGGGCCCGGTTCATCGGAATTGTCATG  
GCAGAAGCGCTGCGAAAGCTGGGAGCAGACAAGGTGCGAGTCAAATGGCCAATGACCTGTATCTGCAGGATAGA  
AAGCTGGCAGGCATCCTGGTGGAGCTGGCCGGAATAACAGGCGATGCTGCACAGATCGTCATTGGCGCCGGGATT  
AACGTGGCTATGAGGCGCGTGGAGGAAAGCGTGGTCAATCAGGGCTGGATCACACTGCAGGAAGCAGGGATTAAC  
CTGGACAGGAATACTCTGGCCGCTATGCTGATCCGAGAGCTGCGGGCAGCCCTGGAAGTGTTCGAGCAGGAAGGC  
CTGGCTCCATATCTGTACGGTGGGAGAAGCTGGATAAATTTCATCAATAGACCCGTGAAGCTGATCATTGGGGAC  
AAAGAGATTTTCGGGATTAGCCGGGGGATTGATAAACAGGGAGCCCTGCTGCTGGAACAGGACGGAGTTATCAAA  
CCCTGGATGGGCGGAGAAATCAGTCTGCGGTCTGCCGAAAAGGACTACAAAGACGATGACGATAAA TGA\_attL3

B TurboID 6xHIS C

AAGAAGACTATACGGGTCTCATCTGAACAATGAAAGACAATACTGTGCCTCTGAAGCTGATCGCTCTCCTGGCTA  
ATGGCGAGTTCCATAGTGGCGAACAGCTGGGAGAAACCCTGGGCATGTCCAGGGCCGCTATCAACAAGCACATT  
AGACTCTGCGCGACTGGGGCGTGGACGTGTTACCGTGCCCGGAAAGGGCTACTCTCTGCCGAGCCTATCCCGC  
TGCTGAACGCTAAACAGATTCTGGGACAGCTGGACGGCGGGAGCGTGGCAGTCTGCTGTGGTTCGACTCCACCA  
ATCAGTACCTGCTGGATCGAATCGGCGAGCTGAAGAGTGGGGATGCTTGCATTGCAGAATATCAGCAGGCAGGGA  
GAGGAAGCAGAGGGAGGAAATGGTTCTCTCCTTTTGGAGCTAACCTGTACCTGAGTATGTTTTGGCGCCTGAAGC  
GGGGACCAGCAGCAATCGGCCTGGGCCCGGTTCATCGGAATTGTCATGGCAGAAGCGCTGCGAAAAGCTGGGAGCAG  
ACAAGGTGCGAGTCAAATGGCCAATGACCTGTATCTGCAGGATAGAAAGCTGGCAGGCATCCTGGTGGAGCTGG  
CCGGAATAACAGGCGATGCTGCACAGATCGTCATTGGCGCCGGGATTAACGTGGCTATGAGGCGCGTGGAGGAAA  
GCGTGGTCAATCAGGGCTGGATCACACTGCAGGAAGCAGGGATTAACCTGGACAGGAATACTCTGGCCGCTACGC  
TGATCCGAGAGCTGCGGGCAGCCCTGGAAGTGTTCGAGCAGGAAGGCCTGGCTCCATATCTGCCACGGTGGGAGA  
AGCTGGATAAATTTCATCAATAGACCCGTGAAGCTGATCATTGGGGACAAAGAGATTTTCGGGATTAGCCGGGGGA  
TTGATAAACAGGGAGCCCTGCTGCTGGAACAGGACGGAGTTATCAAACCCTGGATGGGCGGAGAAATCAGTCTGC  
GGTCTGCCGAAAAGAAGCTTGC GGCCCGCACTCGAG CACCACCACCACCACCACGGCACCTGAGACCTCTGTAGTC  
TTCTT

C TurboID 6xHIS D

AAGAAGACTATACGGGTCTCACACCATGAAAGACAATACTGTGCCTCTGAAGCTGATCGCTCTCCTGGCTAATGG  
CGAGTTCCATAGTGGCGAACAGCTGGGAGAAACCCTGGGCATGTCCAGGGCCGCTATCAACAAGCACATTCAGAC  
TCTGCGCGACTGGGGCGTGGACGTGTTACCGTGCCCGGAAAGGGCTACTCTCTGCCGAGCCTATCCCGCTGCT  
GAACGCTAAACAGATTCTGGGACAGCTGGACGGCGGGAGCGTGGCAGTCTGCTGTGGTTCGACTCCACCAATCA  
GTACCTGCTGGATCGAATCGGCGAGCTGAAGAGTGGGGATGCTTGCATTGCAGAATATCAGCAGGCAGGGAGAGG  
AAGCAGAGGGAGGAAATGGTTCTCTCCTTTTGGAGCTAACCTGTACCTGAGTATGTTTTGGCGCCTGAAGCGGGG  
ACCAGCAGCAATCGGCCTGGGCCCGGTTCATCGGAATTGTCATGGCAGAAGCGCTGCGAAAAGCTGGGAGCAGACAA  
GGTGCAGTCAAATGGCCAATGACCTGTATCTGCAGGATAGAAAGCTGGCAGGCATCCTGGTGGAGCTGGCCGG  
AATAACAGGCGATGCTGCACAGATCGTCATTGGCGCCGGGATTAACGTGGCTATGAGGCGCGTGGAGGAAAGCGT  
GGTCAATCAGGGCTGGATCACACTGCAGGAAGCAGGGATTAACCTGGACAGGAATACTCTGGCCGCTACGCTGAT  
CCGAGAGCTGCGGGCAGCCCTGGAAGTGTTCGAGCAGGAAGGCCTGGCTCCATATCTGCCACGGTGGGAGAAGCT  
GGATAAATTTCATCAATAGACCCGTGAAGCTGATCATTGGGGACAAAGAGATTTTCGGGATTAGCCGGGGGATTGA  
TAAACAGGGAGCCCTGCTGCTGGAACAGGACGGAGTTATCAAACCCTGGATGGGCGGAGAAATCAGTCTGCGGTC  
TGCCGAAAAGAAGCTTGC GGCCCGCACTCGAG CACCACCACCACCACCACAAGGtGAGACCTCTGTAGTCTTCTT

D TurboID 6xHIS E

AAGAAGACTATACGGGTCTCAAAGGGAATGAAAGACAATACTGTGCCTCTGAAGCTGATCGCTCTCCTGGCTAAT  
GGCGAGTTCCATAGTGGCGAACAGCTGGGAGAAACCCTGGGCATGTCCAGGGCCGCTATCAACAAGCACATTCAG



ACTCTGCGCGACTGGGGCGTGGACGTGTTACCGTGCCCGGAAAGGGCTACTCTCTGCCCGAGCCTATCCCGCTG  
CTGAACGCTAAACAGATTCTGGGACAGCTGGACGGCGGGAGCGTGGCAGTCCTGCCTGTGGTTCGACTCCACCAAT  
CAGTACCTGCTGGATCGAATCGGCGAGCTGAAGAGTGGGGATGCTTGCATTGCAGAATATCAGCAGGCAGGGAGA  
GGAAGCAGAGGGAGGAAATGGTTCTCTCCTTTTGGAGCTAACCTGTACCTGAGTATGTTTTGGCGCCTGAAGCGG  
GGACCAGCAGCAATCGGCCTGGGCCCGGTTCATCGGAATTGTCATGGCAGAAGCGCTGCGAAAAGCTGGGAGCAGAC  
AAGGTGCGAGTCAAATGGCCCAATGACCTGTATCTGCAGGATAGAAAAGCTGGCAGGCATCCTGGTGGAGCTGGCC  
GGAATAACAGGCGATGCTGCACAGATCGTCATTGGCGCCGGGATTAACGTGGCTATGAGGCGCGTGGAGGAAAAGC  
GTGGTCAATCAGGGCTGGATCACACTGCAGGAAGCAGGGATTAACCTGGACAGGAATACTCTGGCCGCTACGCTG  
ATCCGAGAGTGCGGGCGCCCTGGAACCTGTTTCGAGCAGGAAGGCCTGGCTCCATATCTGCCACGGTGGGAGAAG  
CTGGATAAATTTCATCAATAGACCCCGTGAAGCTGATCATTGGGGACAAAAGAGATTTTCGGGATTAGCCGGGGGATT  
GATAAACAGGGAGCCCTGCTGCTGGAACAGGACGGAGTTATCAAACCCTGGATGGGCGGAGAAAATCAGTCTGCCG  
TCTGCCGAAAAGAAGCTTGCGGCCGCACTCGAGCACCACCACCACCACCAATCTGAGACCACGAAGTGGGTA

B\_TurboID\_C

AAGAAGACTATACGGGTCTCATCTGAACAATGAAAGACAATACTGTGCCTCTGAAGCTGATCGCTCTCCTGGCTA  
ATGGCGAGTTCCATAGTGGCGAACAGCTGGGAGAAAACCCTGGGCATGTCCAGGGCCGCTATCAACAAGCACATTC  
AGACTCTGCGCGACTGGGGCGTGGACGTGTTACCGTGCCCGGAAAGGGCTACTCTCTGCCCGAGCCTATCCCGC  
TGCTGAACGCTAAACAGATTCTGGGACAGCTGGACGGCGGGAGCGTGGCAGTCCTGCCTGTGGTTCGACTCCACCA  
ATCAGTACCTGCTGGATCGAATCGGCGAGCTGAAGAGTGGGGATGCTTGCATTGCAGAATATCAGCAGGCAGGGA  
GAGGAAGCAGAGGGAGGAAATGGTTCTCTCCTTTTGGAGCTAACCTGTACCTGAGTATGTTTTGGCGCCTGAAGC  
GGGGACCAGCAGCAATCGGCCTGGGCCCGGTTCATCGGAATTGTCATGGCAGAAGCGCTGCGAAAAGCTGGGAGCAG  
ACAAGGTGCGAGTCAAATGGCCCAATGACCTGTATCTGCAGGATAGAAAAGCTGGCAGGCATCCTGGTGGAGCTGG  
CCGGAATAACAGGCGATGCTGCACAGATCGTCATTGGCGCCGGGATTAACGTGGCTATGAGGCGCGTGGAGGAAA  
GCGTGGTCAATCAGGGCTGGATCACACTGCAGGAAGCAGGGATTAACCTGGACAGGAATACTCTGGCCGCTACGC  
TGATCCGAGAGTGCGGGCGCCCTGGAACCTGTTTCGAGCAGGAAGGCCTGGCTCCATATCTGCCACGGTGGGAGA  
AGCTGGATAAATTTCATCAATAGACCCCGTGAAGCTGATCATTGGGGACAAAAGAGATTTTCGGGATTAGCCGGGGGA  
TTGATAAACAGGGAGCCCTGCTGCTGGAACAGGACGGAGTTATCAAACCCTGGATGGGCGGAGAAAATCAGTCTGC  
GGTCTGCCGAAAAGAAGCTTGCGGCCGCACTCGAGGGCACCTGAGACCTCTGTAGTCTTCTT

D\_TurboID\_E

AAGAAGACTATACGGGTCTCAAAGGGAATGAAAGACAATACTGTGCCTCTGAAGCTGATCGCTCTCCTGGCTAAT  
GGCGAGTTCCATAGTGGCGAACAGCTGGGAGAAAACCCTGGGCATGTCCAGGGCCGCTATCAACAAGCACATTCAG  
ACTCTGCGCGACTGGGGCGTGGACGTGTTACCGTGCCCGGAAAGGGCTACTCTCTGCCCGAGCCTATCCCGCTG  
CTGAACGCTAAACAGATTCTGGGACAGCTGGACGGCGGGAGCGTGGCAGTCCTGCCTGTGGTTCGACTCCACCAAT  
CAGTACCTGCTGGATCGAATCGGCGAGCTGAAGAGTGGGGATGCTTGCATTGCAGAATATCAGCAGGCAGGGAGA  
GGAAGCAGAGGGAGGAAATGGTTCTCTCCTTTTGGAGCTAACCTGTACCTGAGTATGTTTTGGCGCCTGAAGCGG  
GGACCAGCAGCAATCGGCCTGGGCCCGGTTCATCGGAATTGTCATGGCAGAAGCGCTGCGAAAAGCTGGGAGCAGAC  
AAGGTGCGAGTCAAATGGCCCAATGACCTGTATCTGCAGGATAGAAAAGCTGGCAGGCATCCTGGTGGAGCTGGCC  
GGAATAACAGGCGATGCTGCACAGATCGTCATTGGCGCCGGGATTAACGTGGCTATGAGGCGCGTGGAGGAAAAGC  
GTGGTCAATCAGGGCTGGATCACACTGCAGGAAGCAGGGATTAACCTGGACAGGAATACTCTGGCCGCTACGCTG  
ATCCGAGAGTGCGGGCGCCCTGGAACCTGTTTCGAGCAGGAAGGCCTGGCTCCATATCTGCCACGGTGGGAGAAG  
CTGGATAAATTTCATCAATAGACCCCGTGAAGCTGATCATTGGGGACAAAAGAGATTTTCGGGATTAGCCGGGGGATT  
GATAAACAGGGAGCCCTGCTGCTGGAACAGGACGGAGTTATCAAACCCTGGATGGGCGGAGAAAATCAGTCTGCCG  
TCTGCCGAAAAGAAGCTTGCGGCCGCACTCGAGCAATCTGAGACCACGAAGTGGGTA

B\_TurboID-sGFP\_C

GGTCTCaTCTGAACAATGAAAGACAATACTGTGCCTCTGAAGCTGATCGCTCTCCTGGCTAATGGCGAGTTCCAT  
AGTGGCGAACAGCTGGGAGAAAACCCTGGGCATGTCCAGGGCCGCTATCAACAAGCACATTCAGACTCTGCGCGAC  
TGGGGCGTGGACGTGTTACCGTGCCCGGAAAGGGCTACTCTCTGCCCGAGCCTATCCCGCTGCTGAACGCTAAA  
CAGATTCTGGGACAGCTGGACGGCGGGAGCGTGGCAGTCCTGCCTGTGGTTCGACTCCACCAATCAGTACCTGCTG  
GATCGAATCGGCGAGCTGAAGAGTGGGGATGCTTGCATTGCAGAATATCAGCAGGCAGGGAGAGGAAGCAGAGGG  
AGGAAATGGTTCTCTCCTTTTGGAGCTAACCTGTACCTGAGTATGTTTTGGCGCCTGAAGCGGGGACCAGCAGCA  
ATCGGCCTGGGCCCGGTTCATCGGAATTGTCATGGCAGAAGCGCTGCGAAAAGCTGGGAGCAGACAAGGTGCGAGTC  
AAATGGCCCAATGACCTGTATCTGCAGGATAGAAAAGCTGGCAGGCATCCTGGTGGAGCTGGCCGGAATAACAGGC  
GATGCTGCACAGATCGTCATTGGCGCCGGGATTAACGTGGCTATGAGGCGCGTGGAGGAAAAGCGTGGTCAATCAG  
GGCTGGATCACACTGCAGGAAGCAGGGATTAACCTGGACAGGAATACTCTGGCCGCTACGCTGATCCGAGAGCTG  
CGGCAGCCCTGGAACCTGTTTCGAGCAGGAAGGCCTGGCTCCATATCTGCCACGGTGGGAGAAGCTGGATAACTTC

ATCAATAGACCCGTGAAGCTGATCATTGGGGACAAAGAGATTTTCGGGATTAGCCGGGGGATTGATAAACAGGGA  
GCCCTGCTGCTGGAACAGGACGGAGTTATCAAACCCTGGATGGGCGGAGAAATCAGTCTGCGGTCTGCCGAAAAG  
AAGCTTGCGGGCCGCACTCGAGAAGGGAGGTGGAGGAGGTTCTGGAGGCGGTGGAAGTGGTGGCGGAGGTAGCCTG  
AGCAAGGGCGAGGAGCTGTTACCCGGGGTGGTGGCCATCCTGGTTCGAGCTGGACGGCGACGTAACCGCCACAAG  
TTCAGCGTGTCCGGCGAGGGCGAGGGCGATGCCACCTACGGCAAGCTGACCCTGAAGTTCATCTGCACCACCGGC  
AAGCTGCCCCGTGCCCTGGCCACCCTCGTGACCACCTTACCTACGGCGTGCAGTGCTTCAGCCGCTACCCCGAC  
CACATGAAGCAGCAGACTTCTTCAAGTCCGCCATGCCCCAAGGCTACGTCCAGGAGCGCACCATCTTCTTCAAG  
GACGACGGCACTACAAGACCCGCGCCGAGGTGAAGTTCGAGGGCGACACCCTGGTGAACCGCATCGAGCTGAAG  
GGCATCGACTTCAAGGAGGACGGCAACATCCTGGGGCACAAGCTGGAGTACAACATAACAGCCACAACGTCTAT  
ATCATGGCCGACAAGCAGAAGAAGCGGCATCAAGGTGAAGTTCAGATCCGCCACAACATCGAGGACGGCAGCGTG  
CAGCTCGCCGACCCTACCAGCAGAACACCCCATCGGCGACGGCCCCGTGCTGCTGCCCGACAACCCTACCTG  
AGCACCCAGTCCGCCCTGAGCAAAGACCCCAACGAGAAGCGCGATCACATGGTCTGCTGGAGTTTCGTGACCGC  
GCCGGATCACTACGGCATGGACGAGCTGTACAAGGGCACCTGAGACC

D\_sGFP-TurboID\_E

AAGAAGACTATACGGGTCTCAAAGGGAATGGTGGAGCAAGGGCGAGGAGCTGTTACCCGGGGTGGTGGCCATCCTG  
GTCGAGCTGGACGGCGACGTAACCGCCACAAGTTCAGCGTGTCCGGCGAGGGCGAGGGCGATGCCACCTACGGC  
AAGCTGACCCTGAAGTTCATCTGCACCACCGGCAAGCTGCCCGTGGCCCTGGCCACCCTCGTGACCACCTTACC  
TACGGCGTGCAGTGCTTCAGCCGCTACCCCGACCACATGAAGCAGCAGACTTCTTCAAGTCCGCCATGCCCGAA  
GGCTACGTCCAGGAGCGCACCATCTTCTTCAAGGACGACGGCAACTACAAGACCCGCGCCGAGGTGAAGTTCGAG  
GGCGACACCCTGGTGAACCGCATCGAGCTGAAGGGCATCGACTTCAAGGAGGACGGCAACATCCTGGGGCACAAG  
CTGGAGTACAACATAACAGCCACAACGTCTATATCATGGCCGACAAGCAGAAGAAGCGGCATCAAGGTGAAGTTC  
AAGATCCGCCACAACATCGAGGACGGCAGCGTGCAGTTCGCCGACCCTACCAGCAGAACACCCCATCGGCGAC  
GGCCCCGTGCTGCTGCCCGACAACCCTACCTGAGCACCAGTCCGCCCTGAGCAAAGACCCTCAACGAGAAGCGC  
GATCACATGGTCTGCTGGAGTTCGTGACCCGCCCGGGATCACTACGGCATGGACGAGCTGTACAAGGGTGGGA  
GGAGGTTCTGGAGGCGGTGAAGTGGTGGCGGAGGTAGCGCACCATGAAAGACAATACTGTGCCTCTGAAGCTG  
ATCGCTCTCCTGGCTAATGGCGAGTTCATAGTGGCGAACAGCTGGGAGAAACCCTGGGCATGTCCAGGGCGCT  
ATCAACAAGCACATTCAGACTCTGCGCGACTGGGGCGTGGACGTGTTACCCGTGCCCGGAAAGGGCTACTCTCTG  
CCCGAGCCTATCCCGCTGCTGAACGCTAAACAGATTCTGGGACAGCTGGACGGCGGGAGCGTGGCAGTCTGCCT  
GTGGTGCAGTCCACCAATCAGTACCTGCTGGATCGAATCGGCGAGCTGAAGAGTGGGGATGCTTGCATTCAGAA  
TATCAGCAGGCAGGGAGAGGAAGCAGAGGGAGGAAATGGTCTCTCTCTTTGGAGCTAACCTGTACCTGAGTATG  
TTTTGGCGCCTGAAGCGGGGACCAGCAGCAATCGGCCTGGGCCCGGTTCATCGGAATTGTCATGGCAGAAGCGCTG  
CGAAAGCTGGGAGCAGACAAGGTGCGAGTCAAATGGCCCAATGACCTGTATCTGCAGGATAGAAAGCTGGCAGGC  
ATCCTGGTGGAGCTGGCCGGAATAACAGGCGATGCTGCACAGATCGTCATTGGCGCCGGGATTAACGTGGCTATG  
AGGCGCGTGGAGGAAAGCGTGGTCAATCAGGGCTGGATCACACTGCAGGAAGCAGGGATTAACCTGGACAGGAAT  
ACTCTGGCCGCTACGCTGATCCGAGAGCTGCGGGCAGCCCTGGAAGTGTTCGAGCAGGAAGGCCTGGCTCCATAT  
CTGCCACGGTGGGAGAAGCTGGATAACTTCATCAATAGACCCGTGAAGCTGATCATTGGGGACAAAGAGATTTTC  
GGGATTAGCCGGGGATTGATAAACAGGGAGCCCTGCTGCTGGAACAGGACGGAGTTATCAAACCCTGGATGGGC  
GGAGAAATCAGTCTGCGGTCTGCCGAAAAGAAGCTTGGCGCCGCACTCGAGTGAGACCACGAAGTGGGTA

GGAG\_p35S\_Linker\_BirA-Myc\_CaMV poly(A)\_CGCT

CCATTGAGACTTTTCAACAAAGGATAATTTTCGGGAAACCTCCTCGGATTCCATTGCCAGCTATCTGTCACTTCA  
TCGAAAGGACAGTAGAAAAGGAAGGTGGCTCCTACAAATGCCATCATTGCGATAAAGGAAAGGCTATCATTCAG  
ATCTCTCTGCCGACAGTGGTCCCAAAGATGGACCCCCACCCACGAGGAGCATCGTGGAAAAAGAAGAGGTCCAA  
CCACGTCTACAAAGCAAGTGGATTGATGTGACATCTCCACTGACGTAAGGGATGACGCACAATCCCCTATCCTT  
CGCAAGACCCTTCTCTATATAAGGAAGTTCATTTTCAATTTGGAGAGGACACGCTCGAGTATAAGAGCTCATTTTT  
ACAACAATTACCAACAACAACAACAACAACAACAATTACAATTACATTTACAATTATCGATACCCATccatGGA  
GAGTAAACGGAATAAGCCAGGGAAGGCGACAGGTAAAGGTAAACCAGTTGGTGATAAATGGCTGGATGATGCAGG  
TAAAGATTCCAGGAGCGCAATTCCAGATCGCATTGCTGATAAGTTGCGTGATAAAGAATTTAAAAGCTTCGACGA  
TTTTTCGGAAGGCTGTATGGGAAGAGGTGTGCAAGATCCTGAGCTTAGTAAAAATTTAAACCCAAGCAATAAGTC  
TAGTGTTCAAAAGGTTATTTCTCCGTTTACTCCAAAGAATCAACAGGTCGGAGGGGAGAAAAGTCTATGAACTTCA  
TCATGACAAGCCAATTAGTCAAGGTGGTGGAGGTTTATGACATGGATAATATCCGAGTGACTACACCTAAGCGACA  
TATCGATATTCACCGAGGTAAGGTTTTCGGATCTGGAGGTGGCGGAAGCGGAGGCGGAGGATCCGGAGGTGGAGG  
TAGCGGCGGTGGAGGCGGTAGTGGAGGAGGAGGTTCTGGTGGAGGTGGCTCAGGTGGTGGTGGGTCAGGCGGTGG  
TGGTAGTGGCGGAGGAGGATCGGGAGGAGGTGGGTCAGGTGGCGGAGGATCTGGAGGGGGTGGTTCGGTGGTGG  
TGTTTCAGCAAGGAGATCTCATTCCGGAAACCGCGCTATTAGATCAAAGGATAACACCGTGCACCTTAAATTTGAT  
TGCCCTTTTAGCGAACGGTGAATTTCACTCTGGTGGAGCAGTTGGGTGAAACGCTTGAATGAGCAGAGCTGCTAT  
TAATAAACACATTCAGACTCTTCGTGACTGGGGAGTTGATGTCTTTACCGTTCAGGTAAGGATACAGCCTGCC  
TGAGCCTATCCAGTTACTTAATGCTAAACAGATATTGGGTGAGCTTGGTGGAGGTAGTGTAGCTGTCTGCCAGT

GATTGACTCCACGAATCAGTACCTTCTTGATCGTATCGGAGAGCTTAAATCTGGTGATGCTTGCATTGCAGAATA  
CCAGCAGGCTGGTTCGTGGAGGTAGAGGTCGTAAATGGTTTTTACCTTTTGGTGCAAACCTTGTATTTGTCAATGTT  
CTGGCGTCTTGAACAAGGTCCAGCTGCAGCTATTGGTTTTAAGTCTTGTATTCGGTATCGTGATGGCCGGAAGTATT  
ACGTAAGCTTGGTGCAGATAAAGTTTCGTGTTAAATGGCCTAATGACCTCTATCTTCAGGATCGTAAAGCTTGCAGG  
AATTCCTTGTGGAGCTCACTGGCAAAACTGGTGATGCAGCTCAAATAGTCATTGGAGCTGGTATCAACATGGCAAT  
GAGGCGTGTGAAGAGAGTGTCTGTTAATCAGGGATGGATCACGCTGCAGGAAGCTGGTATCAATCTCGATCGTAA  
TACGTTGGCAGCTATGCTAATACGTGAATTACGTGCTGCGTTGGAACCTCTCGAACAAGAAGGATTTGGCACCTTA  
TCTTTCACGTTGGGAAAAGCTCGATAATTTTATTAATAGACCAGTGAAACTTATCATTGGTGATAAAGAAATATT  
TGTTGTTTACGTTGGAATAGACAAACAGGGTGCTTTGTTACTTGAGCAGGATGGAATAATAAAAACCTTGGATGGG  
AGGTGAAATATCCCTTCGTAGTGCAGAAAAA**GAACAAAACTCATCTCAGAAGAGGATCTG**TAAGCTTCTCTAGC  
TAGAGTCGATCGACAAGCTCGAGTTTCTCCATAATAATGTGTGAGTAGTTCCAGATAAAGGGAATTAGGGTTCCCT  
ATAGGGTTTCGCTCATGTGTTGAGCATATAAGAAACCTTAGTATGTATTTGTATTTGTAAAATACTTCTATCAA  
TAAAATTTCTAATTCCTAAAACCAAATCCAGTACTAAAATCCAGATCGCTACGCT

GGAG\_ p35S Linker BioID-Myc CaMV poly(A)\_CGCT

CCATTGAGACTTTTCAACAAAGGATAATTTTCGGGAAACCTCCTCGGATTCCATTGCCAGCTATCTGTCACTTCA  
TCGAAAGGACAGTAGAAAAGGAAGGTGGCTCCTACAAATGCCATCATTGCGATAAAGGAAAGCTATCATTTCAAG  
ATCTCTCTGCCGACAGTGGTCCCAAAGATGGACCCCCACCCACGAGGAGCATCGTGAAAAAGAAGAGTTCCAA  
CCACGTCTACAAAGCAAGTGGATTGATGTGACATCTCCACTGACGTAAGGGATGACGCACAATCCCACTATCCTT  
CGCAAGACCCTTCTCTATATAAGGAAGTTCAATTTTCAATTTGGAGAGGACACGCTCGAGTATAAGAGCTCATTTTT  
ACAACAATTACCAACAACAACAACAACAACAACAATTAACAATTACATTTACAATTATCGATACCCATCCATGGA  
GAGTAAACGGAATAAGCCAGGGAAGGCGACAGGTAAAGGTAAACCAGTTGGTGATAAATGGCTGGATGATGCAGG  
TAAAGATTCAGGAGCGCAATTCAGATCGCATTGCTGATAAGTTGCGTGATAAAGAATTTAAAAGCTTCGACGA  
TTTTCGGAAGGCTGTATGGGAAGAGGTGTGCAAGATCCTGAGCTTAGTAAAAATTTAAACCCAAGCAATAAGTC  
TAGTGTTCAAAAGGTTATTCTCCGTTTACTCCAAAGAATCAACAGGTCGGAGGGAGAAAAGTCTATGAACCTCA  
TCATGACAAGCCAATTAGTCAAGGTGGTGAGGTTTATGACATGGATAAATATCCGAGTGACTACACCTAAGCGACA  
TATCGATATTCACCGAGGTAAGGTTTCGGATCTGGAGGTGGCGGAAGCGGAGGCGGAGGATCCGGAGGTGGAGG  
TAGCGGCGGTGGAGGCGGTAGTGGAGGAGGAGGTTCTGGTGGAGGTGGCTCAGGTGGTGGTGGGTCAGGCGGTG  
TGGTAGTGGCGGAGGAGGATCGGGAGGAGGTGGGTCAGGTGGCGGAGGATCTGGAGGGGTGGTTCTGGTGGTGG  
TGTTTCAGCAAGGAGAACCATGGAACAAAACTCATCTCAGAAGAGGATCTGAAGGATAACACCGTGCCACTTA  
AATTGATTGCCCTTTTAGCGAACGGTGAATTTCACTCTGGTGAGCAGTTGGGTGAAACGCTTGGAAATGAGCAGAG  
CTGCTATTAATAAACACATTCAGACTCTTCGTGACTGGGGAGTTGATGTCTTTACCCTCCAGGTAAAGGATAACA  
GCCTGCCTGAGCCTATCCAGTTACTTAATGCTAAACAGATATTGGGTGAGCTTGGTGGAGGTAGTGTAGCTGTGC  
TGCCAGTGATTGACTCCACGAATCAGTACCTTCTTGATCGTATCGGAGAGCTTAAATCTGGTGATGCTTGCATTG  
CAGAATACCAGCAGGCTGGTTCGTGGACGTAGAGGTCGTAAATGGTTTTTACCTTTTGGTGCAAACCTTGTATTTGT  
CAATGTTCTGGCGTCTTGAACAAGGTCCAGCTGCAGCTATTGGTTTTAAGTCTTGTATTCGGTATCGTGATGGCGG  
AAGTATTACGTAAGCTTGGTGCAGATAAAGTTTCGTGTTAAATGGCCTAATGACCTCTATCTTCAGGATCGTAAGC  
TTGCAGGAATTTGTGGAGCTCACTGGCAAAACTGGTGATGCAGCTCAAATAGTCATTGGAGCTGGTATCAACA  
TGGCAATGAGGCGTGTGAAGAGAGTGTCTGTTAATCAGGGATGGATCACGCTGCAGGAAGCTGGTATCAATCTCG  
ATCGTAATACGTTGGCAGCTATGCTAATACGTGAATTACGTGCTGCGTTGGAACCTCTTCGAACAAGAAGGATTTG  
CACCTTATCTTTACGTTGGGAAAAGCTCGATAATTTTATTAATAGACCAGTGAAACTTATCATTTGGTGATAAAG  
AAATATTTGGTATTTACGTTGGAATAGACAAACAGGGTGCTTTGTTACTTGAGCAGGATGGAATAATAAAAACCTT  
GGATGGGAGGTGAAATATCCCTTCGTAGTGCAGAAAAAGGAAACCGCTATTAGATCAGGAATG**GAACAAAAAC**  
**TCATCTCAGAAGAGGATCTG**TAAGCTTCTCTAGCTAGAGTCGATCGACAAGCTCGAGTTTCTCCATAATAATGTG  
TGAGTAGTTCCAGATAAAGGGAATTAGGGTTTCTATAGGGTTTCGCTCATGTGTTGAGCATATAAAGAAACCTT  
GTATGTATTTGTATTTGTAAAATACTTCTATCAATAAAAATTTCTAATTCCTAAAACCAAATCCAGTACTAAAAT  
CCAGATCGCTACGCT

GGAG\_ p35S Linker BioID2-HA CaMV poly(A)\_CGCT

GGAGTGAGACTTTTCAACAAAGGATAATTTTCGGGAAACCTCCTCGGATTCCATTGCCAGCTATCTGTCACTTCA  
TCGAAAGGACAGTAGAAAAGGAAGGTGGCTCCTACAAATGCCATCATTGCGATAAAGGAAAGCTATCATTTCAAG  
ATCTCTCTGCCGACAGTGGTCCCAAAGATGGACCCCCACCCACGAGGAGCATCGTGAAAAAGAAGAGTTCCAA  
CCACGTCTACAAAGCAAGTGGATTGATGTGACATCTCCACTGACGTAAGGGATGACGCACAATCCCACTATCCTT  
CGCAAGACCCTTCTCTATATAAGGAAGTTCAATTTTCAATTTGGAGAGGACACGCTCGAGTATAAGAGCTCATTTTT  
ACAACAATTACCAACAACAACAACAACAACAACAATTAACAATTACATTTACAATTATCGATACCCATccatGGA  
GAGTAAACGGAATAAGCCAGGGAAGGCGACAGGTAAAGGTAAACCAGTTGGTGATAAATGGCTGGATGATGCAGG  
TAAAGATTCAGGAGCGCAATTCAGATCGCATTGCTGATAAGTTGCGTGATAAAGAATTTAAAAGCTTCGACGA  
TTTTCGGAAGGCTGTATGGGAAGAGGTGTGCAAGATCCTGAGCTTAGTAAAAATTTAAACCCAAGCAATAAGTC  
TAGTGTTCAAAAGGTTATTCTCCGTTTACTCCAAAGAATCAACAGGTCGGAGGGAGAAAAGTCTATGAACCTCA

TCATGACAAGCCAATTAGTCAAGGTGGTGGAGGTTTATGACATGGATAAATATCCGAGTGACTACACCTAAGCGACA  
TATCGATATTCACCGAGGTAAGGTTTTCGGGATCTGGAGGTGGCGGAAGCGGAGGCGGAGGATCCGGAGGTGGAGG  
TAGCGGCGGTGGAGGCGGTAGTGGAGGAGGAGGTTCTGGTGGAGGTGGCTCAGGTGGTGGTGGGTCAGGCGGTG  
TGGTAGTGGCGGAGGAGGATCGGGAGGAGGTGGGTGAGGTGGCGGAGGATCTGGAGGGGTGGTTCCTGGTGGTGG  
TGGTTCAGCAAGGAGATTTAAGAAGTTGATATGGCTGAAAGAAGTAGATTCCACACAAGAGAGACTTAAAGAATG  
GAATGTCTCCTATGGGACTGCACCTGTTGCCGATAGGCAAACCAAAGGAAGAGGCGGGTTAGGACGTAAATGGTT  
ATCTCAAGAAGGCGGTCTATACTTCAGTTTTCTTCTGAATCCTAAAGAGTTTGAAGACTTGCCTCAGCTTCCTTT  
GGTGTGGGTTTTATCGTTTTCCGAGGCTCTGGAGGAAATCACTGAGATCCCATTTTCTCTCAAATGGCCTAATGA  
CGTTTACTTCCAGGAGAAGAAAGTATCTGGTGTGCTTTGTGAATCTCAAAGGACAAGCTAATTTGTTGGAATCGG  
TATTAACGTCAATCAGAGAGAAATTCGGAAGAGATCAAAGATCGAGCTACAACACTATACGAGATTACCGGTAA  
GGATTGGGACAGAAAGGAGGTCCTACTCAAAGTGTAAAACGGATATCAGAGAAGTTGAAGAAGTTCAAGGAAAA  
GAGCTTCAAAGAATTCAAAGGGAAGATAGAATCCAAAATGTTGTACCTTGGGGAAGAAGTGAAGCTTTTGGGAGA  
AGGAAAGATAACGGGAAAGCTCGTTGGGCTTAGTGAGAAAGGGGGGGCTTTGATTCTCACTGAAGAGGGAAATTA  
GGAGATCTTATCTGGGGAATTTAGTCTCAGGCGTAGCTATCCCTATGATGTTCCAGATTATGCGTAAGCTTCTCT  
AGCTAGAGTGCATCGACAAGCTCGAGTTTCTCCATAATAATGTGTGAGTAGTTCAGATAAGGGAATTAGGGTT  
CCTATAGGGTTTTCGCTCATGTGTTGAGCATATAAGAAACCTTAGTATGTATTTGTATTTGTAAAATACTTCTAT  
CAATAAAATTTCTAATTCCTAAAACCAAATCCAGTACTAAAATCCAGATCGCT

GGAG\_ p35S\_sGFP\_Linker\_TurboID\_6xHIS-3xFLAG\_CaMV poly(A)\_CGCT

GGAGGAATTCCAATCCACAAAAATCTGAGCTTAACAGCACAGTTGCTCCTCTCAGAGCAGAATCGGGTATTCAA  
CACCTCATATCAACTACTACGTTGTGTATAACGGTCCACATGCCGGTATATACGATGACTGGGGTTGTACAAA  
GCGGCAACAAACGGCGTTCCCGGAGTTGCACACAAGAAATTTGCCACTATTACAGAGGCAAGAGCAGCAGCTGAC  
GCGTACACAACAAGTCAGCAAACAGACAGGTTGAATTCATCCCCAAAGGAGAAGCTCAACTCAAGCCCAAGAGC  
TTTGCTAAGGCCCTAACAAGCCCAAAAGCAAAAAGCCCACTGGCTCACGCTAGGAACCAAAAGGCCCAGCAGT  
GATCCAGCCCCAAAAGAGATCTCCTTTGCCCGGAGATTACAATGGACGATTTCTCTATCTTTACGATCTAGGA  
AGGAAGTTCGAAGGTGAAGGTGACGACACTATGTTACCACACTGATAATGAGAAGGTAGCTCTCAATTCAGA  
AAGAATGCTGACCCACAGATGGTTAGAGAGGCTACGCAGCAAGTCTCATCAAGACGATCTACCCGAGTAACAAT  
CTCCAGGAGATCAAATACCTTCCCAAGAAGGTTAAAGATGCAGTCAAAGATTCAAGACTAATTTGCATCAAGA  
ACAGAGAAAGACATATTTCTCAAGATCAGAAGTACTATTCAGTATGGACGATTCGAAGGCTTGTCTCATAAACCA  
AGGCAAGTAATAGAGATTGGAGTCTCTAAAAAGGTAGTTTCTACTGAATCTAAGGCCATGCATGGAGTCTAAGAT  
TCAAATCGAGGATCTAACAGAAGTCCGCGTCAAGACTGGCGAACAGTTCATACAGAGTCTTTTACGACTCAATGA  
CAAGAAGAAAATCTTCGTCAACATGGTGGAGCACGACACTCTGGTCTACTCCAAAATGTCAAAGATACAGTCTC  
AGAAGATCAAAGGGCTATTGAGACTTTTCAACAAAGGATAATTTCCGGAAACCTCCTCGGATTCATTTGCCAGC  
TATCTGTCACTTCATCGAAAGGACAGTAGAAAAGGAAGGTGGCTCCTACAAATGCCATCATTGCGATAAAGGAAA  
GGCTATCATTCAAGATCTCTCTGCCGACAGTGGTCCCAAAGATGGACCCCCACCCACGAGGAGCATCGTGGAAAA  
AGAAGAGGTTCCAACCACGTCTACAAAGCAAGTGGATTGATGTGACATCTCCACTGACGTAAGGGATGACGCACA  
ATCCCACTATCCTTCGCAAGACCCTTCTCTATATAAGGAAGTTCATTTTCAATTTGGAGAGGACACGCAATGGGCC  
CCGACATCGTGATGACCCAGAGCCCCAGCAGCCTGAGCGCCAGCGTGGGGCAGCCGCTGACCATCACCTGCCGCA  
GCAGCACCGGCGCCGTGACCACCAGCAACTACGCCAGCTGGGTGCAGGAGAAGCCCGGCAAGCTGTTCAAGGGCC  
TGATCGGCGGCACCAACAACCGCGCCCCCGGCGTGGCCAGCCGCTTCAGCGGCAGCCTGATCGGCGACAAGGCCA  
CCCTGACCATCAGCAGCCTGCAGCCCCGAGGACTTCGCCACCTACTTCTGCGCCCTGTGGTACAGCAACCCTGGG  
TGTTCCGGCAGGCGACCAAGGTGGAGTGAAGCTCGCGCGCGCGCCGCGGAGCGGCGGCGGCGGCGGCGGCGG  
TGCTGGAGAGCGGCGCGGCTGGTGCAGCCCCGCGGCAAGCTGAAGCTGAGCTGCGCCGTGAGCGGCTTCAGCC  
TGAGACTACGGCGTGAAGTGGTGCAGCCAGGCCCCCGCGCCGCGGCTGGAGTGGATCGGCGTGCATCGGCGG  
ACGGCATCACCGACTACAACAGCGCCCTGAAGGACCGCTTCATCATCAGCAAGGACAACGGCAAGAACACCGTGT  
ACCTGCAGATGAGCAAGGTGCGCAGCGACGACACCGCCCTGTACTACTGCGTGACCGGCTGTTTCGACTACTGGG  
GCCAGGGCACCCCTGGTACCCTGAGCAGCTACCCATACGATGTTCCAGATTACGCTGGTGGAGGCGGAGGTTCTG  
GGGAGGAGGTAGTGGCGGTGGTGGTTCAGGAGGCGGCGGAAGCTTGGATCCAGGTGGAGGTGGAAGCGGTAGCA  
AAGGAGAAGAATTTTCACTGGAGTTGTCCCAATTTCTGTTGAATTAGATGGTGATGTTAATGGGCACAAATTTT  
CTGTCCGTGGAGAGGTTGAAGGTGATGCTACAAACGGAAAATCACCCTTAAATTTATTTGCACTACTGGAAAAC  
TACCTGTTCCGTGGCCAACACTTGTCACTACTCTGACCTATGGTGTTCATGCTTTTCCGTTATCCGGATCACA  
TGAAACGGCATGACTTTTTCAAGAGTGCCATGCCCGAAGGTTATGTACAGGAACGCACTATATCTTTCAAAGATG  
ACGGGACCTACAAGACGCGTGTGAAGTCAAGTTTGAAGGTGATACCCTTGTTAATCGTATCGAGTTAAAGGGTA  
TTGATTTTAAAGAAGATGGAACATTTCTGGACACAAACTCGAGTACAATTTAACTCACACAATGTATACATCA  
CGGCAGACAAAACAAAAGAAATGGAATCAAAGCTAACTTCAAATTCGCCACAACGTTGAAGATGGTTCCGTTCAAC  
TAGCAGACCATTATCAACAAAATACTCCAATTTGGCGATGGCCCTGTCTTTTACCAGACAACCATTACCTGTGCA  
CACAATCTGTCTTTTCAAGAGTCCCAACGAAAAGCGTACCACATGGTCTTCTTGAAGTTTGTAACTGCTGCTG  
GGATTACACATGGCATGGATGAGCTTACAAAAGTGGTTCGGGTTCTGGAGGAGGTGGATCTGCAAGCAAGGACA  
ATACTGTGCCTTTGAAGCTAATAGCTTTGCTTGCGAATGGAGAATTCATTCGGGGAAACAACCTGGCGAAACAT  
TAGGGATGTCAGTGTCTATCAACAAGCACATTCAGACTCTAAGGGATTGGGGTGTGATGTGTTCACTGTCC

CTGGCAAAGGATACTCTCTCCCTGAACCTATTCCCCTTCTTAACGCTAAGCAGATACTGGGGCAACTCGATGGTG  
GTAGTGTGGCGGTTTTTGCCAGTTGTGGATTCAACGAACCAGTATCTTCTCGATCGTATCGGAGAGCTTAAAAGTG  
GAGATGCGTGTATAGCAGAGTACCAACAAGCTGGTAGAGGTTACGAGGACGGAAATGGTTTTACCCCTTTGGCG  
CCAATTTGTACTTGAGCATGTTTTGGCGACTCAAAAGAGGTCCAGCTGCAATAGGTCTTGGACCTGTCATCGGCA  
TCGTTATGGCAGAAGCGTTAAGGAAACTTGGTGCCGATAAGGTACGTGTAAAATGGCCAAATGATCTCTATTTAC  
AGGATCGTAAGCTAGCAGGAATTCTGGTTGAACTAGCAGGCATTACCGGAGATGCTGCTCAGATTGTCATTGGAG  
CTGGAATTAACGTTGCCATGAGGAGAGTCGAGGAATCGGTTGTAAATCAAGGTTGGATCACACTTCAAGAAGCTG  
GGATTAACCTAGACAGAAATACGCTTGCTGCAACCCTCATTAGGGAGTTACGGGCTGCTTTGGAACCTCTTGAGC  
AGGAAGGTTTTGGCTCCATATCTGCCTAGATGGGAGAAACTCGATAACTTCATCAATAGACCGGTTAAGCTGATAA  
TTGGAGACAAGGAGATCTTTGGGATATCTAGAGGTATCGACAAACAAGGTGCATTGCTTTTAGAGCAAGATGGGG  
TGATCAAGCCATGGATGGGCGGAGAGATAAGCTTGAGATCGGCCGAAAAGTTGCAAGGGAGTGGTAGAGGATCC  
ATCATCATCACCATCACGACTATGATATTCCGACTACAGCCTCTGAGAACCTGTATTTCCAGGGTGAGTTAGATT  
ACAAAGACCATGATGGAGATTATAAGGATCACGATATCGACTACAAAGATGACGACGATAAA TAAGCTTCGAACT  
CTAGCTAGAGTCGATCGACAAGCTCGAGTTTCTCCATAATAATGTGTGAGTAGTCCCAGATAAGGGAATTAGGG  
TTCCTATAGGGTTTTCGCTCATGTGTTGAGCATATAAGAAACCCTTAGTATGTATTTGTATTTGTAAAATACTTCT  
ATCAATAAAATTTCTAATTCCTAAAACCAAATCCAGTACTAAAATCCAGATCGCT
